# Supplementary material for: A-to-I RNA editing of CYP18A1 mediates transgenerational wing dimorphism in aphids
Source: eLife. 2025 Apr 3;13:RP96540. doi: 10.7554/eLife.96540 (PMC11968105; doi:10.7554/eLife.96540)
Supplement: Supplementary file 1. [file elife-96540-supp1.xlsx]

## Sheet: Sheet1
Statistics for sequencing data for M. dirhodum genome assembly
Method	Insert size (bp)	Data (Gb)	Coverage (X)	Usage
Illumina NovaSeq	500	41.17	92.22	Survey, correction
PacBio Sequel	10,000-20,000	161.53	361.82	De novo assembly
Hi-C	100-500	38.09	85.31	Chromosome-level assembly
