# Supplementary material for: A-to-I RNA editing of CYP18A1 mediates transgenerational wing dimorphism in aphids
Source: eLife. 2025 Apr 3;13:RP96540. doi: 10.7554/eLife.96540 (PMC11968105; doi:10.7554/eLife.96540)
Supplement: Supplementary file 2. [file elife-96540-supp2.xlsx]

## Sheet: Sheet1
Overview of chromosome length of M. dirhodum assembly
chromosome	chromosome length (bp)
Chr1	160037049
Chr2	44416729
Chr3	41762923
Chr4	40071662
Chr5	39359500
Chr6	39321500
Chr7	38521574
Chr8	36722967
Chr9	33431937
Total	473,645,841 (98.50%)
