# Supplementary material for: A-to-I RNA editing of CYP18A1 mediates transgenerational wing dimorphism in aphids
Source: eLife. 2025 Apr 3;13:RP96540. doi: 10.7554/eLife.96540 (PMC11968105; doi:10.7554/eLife.96540)
Supplement: Supplementary file 3. [file elife-96540-supp3.xlsx]

## Sheet: Sheet1
Gene family clusters of ten species
Species	01:01:01	N:N:N	Specific	Other	Uncluster
M. dirhodum	225	5006	981	8764	3027
A. pisum	225	8926	1634	14595	3129
A. lucorum	225	5098	4785	4481	5522
B. tabaci	225	8163	5391	6974	1984
D. noxia	225	7163	177	8649	1262
D. melanogaster	225	12527	9287	6115	2563
M. sacchari	225	7757	345	10079	668
M. persicae	225	8542	647	13153	1343
N. lugens	225	9959	9145	10409	3185
R. maidis	225	8052	392	10435	399
Note: 1:1:1 (single copy orhologous genes in communal gene families); N:N:N (mutiple copy orthologous genes in communal gene families); Specific (genes from unique gene family from each species); Other (genes that do not belong to any above mentioned ortholog categories); Uncluster (genes that do not cluster to any families).
