# Supplementary material for: A-to-I RNA editing of CYP18A1 mediates transgenerational wing dimorphism in aphids
Source: eLife. 2025 Apr 3;13:RP96540. doi: 10.7554/eLife.96540 (PMC11968105; doi:10.7554/eLife.96540)
Supplement: Supplementary file 4. [file elife-96540-supp4.xlsx]

## Sheet: Sheet1
Chromosome-level synteny analysis between Metopolophium dirhodum and Acyrthosiphon pisum.
Metopolophium dirhodum			Acyrthosiphon pisum
Chromosome	location start	location end	Chromosome	location start	location end
Chr01	243608	245237	Chr X	14593518	14591892
Chr01	908761	911520	Chr X	39861954	39864723
Chr01	2373597	2375121	Chr X	48066672	48068193
Chr01	2483409	2484564	Chr X	18420761	18421923
Chr01	2715288	2717359	Chr X	49424396	49426479
Chr01	3948156	3952482	Chr X	117006740	117002387
Chr01	5886147	5890600	Chr X	132441005	132436534
Chr01	7071612	7073810	Chr X	130594955	130592768
Chr01	7076124	7077936	Chr X	130591992	130590169
Chr01	10341226	10342494	Chr X	111552222	111550954
Chr01	10462518	10464262	Chr X	129717642	129715887
Chr01	10501677	10502892	Chr X	43582719	43583916
Chr01	11590921	11596763	Chr X	124132051	124126212
Chr01	14304246	14306005	Chr X	18370335	18368598
Chr01	14763293	14767884	Chr X	113905334	113909938
Chr01	15111871	15113475	Chr X	43774329	43775925
Chr01	15164788	15165955	Chr X	43775925	43774765
Chr01	15336746	15338053	Chr X	423422	424756
Chr01	15979832	15980918	Chr X	126101308	126102403
Chr01	15990953	15992478	Chr X	18395561	18394067
Chr01	15993655	15994895	Chr X	18393988	18392735
Chr01	16022191	16024600	Chr X	126151839	126149428
Chr01	16050315	16052957	Chr X	125902233	125899592
Chr01	16083303	16085985	Chr X	20462479	20459782
Chr01	16086967	16089979	Chr X	20458103	20455056
Chr01	16092878	16093994	Chr X	20449867	20448768
Chr01	16298622	16300869	Chr X	125716335	125714082
Chr01	16505130	16506602	Chr X	125582369	125580882
Chr01	16515447	16518813	Chr X	125574659	125571305
Chr01	16547823	16551907	Chr X	125515572	125511481
Chr01	16696098	16697390	Chr X	125296629	125295305
Chr01	18201874	18203891	Chr X	120485715	120487735
Chr01	18274678	18277386	Chr X	122940320	122943025
Chr01	18405070	18406600	Chr X	111708003	111709525
Chr01	18407397	18410893	Chr X	111712624	111716113
Chr01	18820678	18821739	Chr X	122493935	122492885
Chr01	18978123	18986493	Chr X	122300133	122291790
Chr01	19091446	19093589	Chr X	122205419	122203253
Chr01	19558803	19561350	Chr X	26790588	26793121
Chr01	19928807	19930204	Chr X	102778810	102780171
Chr01	20314569	20317011	Chr X	120790399	120787989
Chr01	20541951	20543291	Chr X	91643443	91642117
Chr01	20774444	20776881	Chr X	119599680	119597264
Chr01	20911537	20913514	Chr X	119348456	119346466
Chr01	20965190	20967191	Chr X	119287317	119285309
Chr01	22018880	22023789	Chr X	115657272	115652354
Chr01	22025632	22029818	Chr X	115652357	115648178
Chr01	22031462	22032509	Chr X	115646575	115645552
Chr01	22100592	22101897	Chr X	115582937	115581627
Chr01	22609372	22611311	Chr X	26460524	26462494
Chr01	22808876	22811947	Chr X	45838617	45835533
Chr01	22814002	22816025	Chr X	79892156	79890220
Chr01	22833664	22837827	Chr X	115283001	115278840
Chr01	23218135	23219215	Chr X	114543363	114544452
Chr01	23247241	23248418	Chr X	38679081	38680255
Chr01	23308747	23311609	Chr X	114499406	114496551
Chr01	23524351	23526820	Chr X	113795338	113792865
Chr01	23644260	23650362	Chr X	113581877	113587949
Chr01	23682146	23683182	Chr X	113495466	113496506
Chr01	23714267	23716150	Chr X	18361062	18362945
Chr01	23798410	23799810	Chr X	113669374	113670802
Chr01	23813147	23816122	Chr X	113776743	113773760
Chr01	24461222	24462868	Chr X	22163778	22165400
Chr01	25153759	25157165	Chr X	110385134	110381750
Chr01	26077908	26078947	Chr X	130389957	130388927
Chr01	26631038	26634053	Chr X	110410802	110413767
Chr01	27497941	27500884	Chr X	12582299	12585194
Chr01	27499946	27502571	Chr X	12577976	12580605
Chr01	28281523	28282972	Chr X	37424897	37426361
Chr01	28351606	28356201	Chr X	35852306	35856911
Chr01	28376516	28378636	Chr X	37301455	37303578
Chr01	28931578	28935547	Chr X	56198019	56194010
Chr01	28980273	28982395	Chr X	108933240	108935380
Chr01	29427114	29429947	Chr X	111051352	111054242
Chr01	29555262	29556652	Chr X	107055966	107057356
Chr01	29564479	29567094	Chr X	107065211	107067836
Chr01	29567975	29571230	Chr X	107067873	107071155
Chr01	29571637	29576756	Chr X	107071154	107076328
Chr01	29577295	29579225	Chr X	107076560	107078507
Chr01	29580111	29584785	Chr X	107079493	107084130
Chr01	29893177	29897173	Chr X	107523832	107527840
Chr01	29983422	29985449	Chr X	106619836	106617773
Chr01	30041022	30042867	Chr X	110896348	110898211
Chr01	30359897	30361012	Chr X	106795764	106796868
Chr01	30503531	30506062	Chr X	104358528	104361033
Chr01	30876100	30877409	Chr X	48577940	48579248
Chr01	31327406	31329223	Chr X	104930677	104932496
Chr01	32290216	32291587	Chr X	104721053	104719687
Chr01	32466460	32468988	Chr X	104361033	104358528
Chr01	32531332	32533336	Chr X	101377095	101375095
Chr01	32880208	32881622	Chr X	23979779	23981217
Chr01	33371456	33372552	Chr X	116303805	116302708
Chr01	33635111	33638590	Chr X	74847626	74851093
Chr01	34103070	34105715	Chr X	38202804	38205482
Chr01	34251203	34253165	Chr X	103140875	103142861
Chr01	34318483	34320004	Chr X	23527589	23529117
Chr01	34510289	34513339	Chr X	119166828	119163763
Chr01	34517553	34519840	Chr X	119155331	119157620
Chr01	35361480	35367493	Chr X	17265410	17259393
Chr01	36216972	36218418	Chr X	38703030	38701589
Chr01	36427088	36428430	Chr X	26710486	26711821
Chr01	36428432	36429835	Chr X	26712119	26713510
Chr01	36602741	36605379	Chr X	116857586	116860218
Chr01	36927454	36928962	Chr X	113545883	113547406
Chr01	37031797	37033495	Chr X	87481096	87482804
Chr01	37609896	37610958	Chr X	28415436	28414376
Chr01	37694736	37696138	Chr X	20025012	20026442
Chr01	37800102	37803966	Chr X	98186401	98182596
Chr01	38291275	38293141	Chr X	121385003	121383146
Chr01	38804165	38805750	Chr X	97238105	97239659
Chr01	39000546	39003627	Chr X	96800910	96797782
Chr01	39092818	39096195	Chr X	96683989	96687392
Chr01	39373066	39377111	Chr X	96341100	96337097
Chr01	40292228	40294844	Chr X	112467414	112464780
Chr01	40360905	40364008	Chr X	95980792	95977667
Chr01	40366135	40368801	Chr X	95977260	95974575
Chr01	40369125	40370456	Chr X	95974370	95973035
Chr01	40375386	40376619	Chr X	95969023	95967783
Chr01	40383261	40384808	Chr X	95958701	95957151
Chr01	40770854	40772746	Chr X	127251687	127253608
Chr01	41115574	41116989	Chr X	2328483	2327071
Chr01	41216507	41217815	Chr X	41240786	41239473
Chr01	41467608	41469275	Chr X	95001803	95003475
Chr01	41494161	41497840	Chr X	36132552	36128872
Chr01	41644073	41645502	Chr X	118305808	118307246
Chr01	41799678	41803015	Chr X	19404009	19400659
Chr01	42001488	42003413	Chr X	46111036	46112981
Chr01	42108981	42111125	Chr X	46642127	46644292
Chr01	42522016	42523266	Chr X	94494650	94493390
Chr01	43331430	43332933	Chr X	43772266	43773740
Chr01	43377383	43378975	Chr X	26516067	26517661
Chr01	43652740	43654982	Chr X	93769161	93771418
Chr01	43663413	43665058	Chr X	93778092	93779720
Chr01	43795265	43799594	Chr X	93611348	93607013
Chr01	44021748	44024742	Chr X	93485529	93482542
Chr01	44376712	44380854	Chr X	93099182	93095010
Chr01	44654780	44658483	Chr X	92953244	92949571
Chr01	44788110	44792405	Chr X	92226784	92222482
Chr01	44831664	44833125	Chr X	92179956	92178469
Chr01	44903002	44904433	Chr X	92106383	92104968
Chr01	45011537	45012696	Chr X	91939496	91938361
Chr01	45014851	45016591	Chr X	91935517	91933761
Chr01	45028445	45031289	Chr X	91926475	91923678
Chr01	45061393	45062646	Chr X	91896729	91895471
Chr01	45119666	45120831	Chr X	26241513	26240334
Chr01	45254545	45256253	Chr X	91546934	91545234
Chr01	45257728	45269273	Chr X	91544015	91532382
Chr01	45305480	45314406	Chr X	91492879	91483834
Chr01	45317592	45323384	Chr X	91480876	91475079
Chr01	45328982	45331499	Chr X	91468566	91466057
Chr01	45332622	45336103	Chr X	91464882	91461408
Chr01	45358271	45359357	Chr X	91437005	91435907
Chr01	45375254	45377569	Chr X	91416833	91414482
Chr01	45390162	45391740	Chr X	91398064	91396487
Chr01	45425564	45429764	Chr X	91373767	91369570
Chr01	45554091	45556201	Chr X	91242287	91240201
Chr01	45556752	45559086	Chr X	91239025	91236714
Chr01	45625237	45626712	Chr X	91164216	91162762
Chr01	45676178	45688883	Chr X	91112509	91099707
Chr01	45735962	45751337	Chr X	90886877	90871528
Chr01	45770541	45773026	Chr X	90851773	90849269
Chr01	45807417	45808800	Chr X	90844515	90843106
Chr01	45845988	45849568	Chr X	90802631	90799040
Chr01	45973481	45975708	Chr X	90641146	90638889
Chr01	45976519	45981256	Chr X	90636431	90631718
Chr01	45987766	45989996	Chr X	90627412	90625163
Chr01	46046452	46055734	Chr X	90561834	90552464
Chr01	46162279	46164699	Chr X	90460331	90457914
Chr01	46164985	46167416	Chr X	90456914	90454461
Chr01	46234168	46235529	Chr X	90391547	90390200
Chr01	46268483	46269903	Chr X	90360930	90359519
Chr01	46310820	46313900	Chr X	90318268	90315204
Chr01	46322030	46323655	Chr X	90305730	90304126
Chr01	46677265	46682486	Chr X	89896324	89891041
Chr01	46707219	46708838	Chr X	89832787	89831195
Chr01	46714204	46717122	Chr X	89827972	89825003
Chr01	46736642	46741267	Chr X	89808431	89803780
Chr01	46828295	46832158	Chr X	89727475	89723620
Chr01	46966117	46969465	Chr X	89515473	89512119
Chr01	46969467	46970986	Chr X	89511976	89510451
Chr01	47021519	47023884	Chr X	89456908	89454557
Chr01	47026479	47027569	Chr X	89451607	89450547
Chr01	47055037	47056251	Chr X	89391058	89389835
Chr01	47056425	47057472	Chr X	89389650	89388627
Chr01	47058326	47059395	Chr X	89384654	89383594
Chr01	47071329	47077800	Chr X	89372782	89366343
Chr01	47095861	47097792	Chr X	89342000	89340054
Chr01	47102638	47103854	Chr X	89332314	89331104
Chr01	47122014	47123475	Chr X	89312754	89311326
Chr01	47123753	47125811	Chr X	89310377	89308312
Chr01	47141201	47146446	Chr X	47808505	47813752
Chr01	47178714	47180258	Chr X	89288790	89287262
Chr01	47227117	47231019	Chr X	26534433	26538312
Chr01	47235056	47237090	Chr X	89237002	89234953
Chr01	47252862	47255011	Chr X	89190168	89192284
Chr01	47262137	47263913	Chr X	89196717	89198459
Chr01	47283560	47284978	Chr X	89167838	89166425
Chr01	47287466	47292775	Chr X	89158415	89153048
Chr01	47295491	47296659	Chr X	89150815	89149622
Chr01	47296836	47298703	Chr X	89149630	89147774
Chr01	47299039	47301172	Chr X	89147716	89145554
Chr01	47321617	47323957	Chr X	89131098	89128747
Chr01	47324614	47327532	Chr X	89127983	89125060
Chr01	47328585	47330409	Chr X	89123851	89122028
Chr01	47333137	47334893	Chr X	89112964	89111201
Chr01	47488688	47489839	Chr X	88967463	88966332
Chr01	47531520	47532831	Chr X	88930099	88928806
Chr01	47552909	47555438	Chr X	88908589	88906065
Chr01	47556573	47561547	Chr X	88904970	88900035
Chr01	47574056	47577552	Chr X	88878613	88875108
Chr01	47606747	47609602	Chr X	88847329	88844467
Chr01	47621212	47623567	Chr X	88823008	88820676
Chr01	47644881	47649075	Chr X	88798366	88794110
Chr01	47649206	47651857	Chr X	88794104	88791424
Chr01	47661189	47663940	Chr X	88782000	88779239
Chr01	47666693	47674322	Chr X	88777789	88770173
Chr01	47700956	47702283	Chr X	88738788	88737459
Chr01	47709505	47710783	Chr X	88731686	88730433
Chr01	47715703	47719305	Chr X	88724910	88721286
Chr01	47782560	47783573	Chr X	88646477	88645440
Chr01	47872133	47874682	Chr X	88546426	88543897
Chr01	47898017	47900327	Chr X	88520828	88518502
Chr01	47930948	47933092	Chr X	88495725	88493571
Chr01	47989723	47993064	Chr X	116243556	116240184
Chr01	48000764	48003403	Chr X	48923812	48926456
Chr01	48005551	48007343	Chr X	88450209	88451979
Chr01	48007741	48012441	Chr X	88394556	88399243
Chr01	48013410	48015052	Chr X	88402742	88404355
Chr01	48017334	48023879	Chr X	88406166	88412706
Chr01	48027096	48031649	Chr X	88413091	88417629
Chr01	48033933	48036533	Chr X	88419567	88422159
Chr01	48036952	48040276	Chr X	88422167	88425474
Chr01	48086983	48088696	Chr X	88290743	88289044
Chr01	48137444	48140394	Chr X	39253443	39256383
Chr01	48372757	48374213	Chr X	87970830	87969374
Chr01	48390150	48391745	Chr X	87957470	87955890
Chr01	48490607	48491928	Chr X	87856979	87855653
Chr01	48607236	48610157	Chr X	87736294	87733476
Chr01	48620890	48630233	Chr X	87723630	87714362
Chr01	48635222	48639231	Chr X	87709397	87705390
Chr01	48661207	48663279	Chr X	87683217	87681167
Chr01	48683303	48685283	Chr X	87652284	87654262
Chr01	48702958	48705691	Chr X	87630730	87627966
Chr01	48708758	48710337	Chr X	87625713	87624127
Chr01	48711124	48712310	Chr X	87623584	87622381
Chr01	48713742	48714757	Chr X	87622388	87621369
Chr01	48745467	48747617	Chr X	87586834	87584711
Chr01	48761237	48765012	Chr X	87571920	87568148
Chr01	48771345	48772587	Chr X	87563005	87561752
Chr01	48780709	48781874	Chr X	87557453	87556292
Chr01	48782793	48787600	Chr X	87555773	87550915
Chr01	48790888	48792521	Chr X	87547714	87546076
Chr01	48792552	48798018	Chr X	87545220	87539759
Chr01	48804981	48812794	Chr X	87532494	87524582
Chr01	48817998	48819343	Chr X	87516258	87514874
Chr01	48825138	48826778	Chr X	87510387	87508763
Chr01	48840760	48842679	Chr X	87497316	87495432
Chr01	48854921	48856149	Chr X	87466662	87465435
Chr01	48856158	48858938	Chr X	87465181	87462362
Chr01	48870188	48871339	Chr X	87444848	87443658
Chr01	48876665	48879696	Chr X	87437260	87434226
Chr01	48879692	48882325	Chr X	87434051	87431437
Chr01	48902751	48909087	Chr X	87411066	87404703
Chr01	49023774	49025411	Chr X	97239659	97238053
Chr01	49024339	49027433	Chr X	87266564	87263497
Chr01	49067400	49069843	Chr X	87214813	87212340
Chr01	49077514	49080288	Chr X	87206221	87203442
Chr01	49089022	49091161	Chr X	87192253	87190090
Chr01	49111021	49113024	Chr X	87158197	87156168
Chr01	49113529	49116537	Chr X	87155899	87152960
Chr01	49116542	49118198	Chr X	87152843	87151198
Chr01	49119053	49121451	Chr X	87151078	87148641
Chr01	49121496	49125228	Chr X	87148452	87144745
Chr01	49129403	49130652	Chr X	87140930	87139668
Chr01	49139639	49146176	Chr X	87129014	87122520
Chr01	49146455	49149494	Chr X	87122517	87119493
Chr01	49150041	49152178	Chr X	87119324	87117164
Chr01	49176086	49177271	Chr X	87093900	87092704
Chr01	49182653	49185499	Chr X	87087249	87084456
Chr01	49188893	49192046	Chr X	87079666	87076530
Chr01	49214817	49218370	Chr X	87058156	87054632
Chr01	49220526	49222616	Chr X	87052347	87050229
Chr01	49261802	49265273	Chr X	87013939	87010514
Chr01	49276472	49278706	Chr X	86999473	86997242
Chr01	49285963	49291222	Chr X	86991201	86985971
Chr01	49465764	49467145	Chr X	86792271	86790862
Chr01	49486128	49489477	Chr X	86768569	86765209
Chr01	49499995	49501088	Chr X	86756325	86755231
Chr01	49527807	49529112	Chr X	86729924	86728621
Chr01	49573447	49574793	Chr X	86680981	86679626
Chr01	49611980	49613356	Chr X	86632419	86631047
Chr01	49728813	49730237	Chr X	86522592	86521171
Chr01	49737943	49740147	Chr X	86513799	86511597
Chr01	49752812	49756750	Chr X	86486521	86482596
Chr01	49803200	49804390	Chr X	86451268	86450062
Chr01	49871950	49873268	Chr X	99214426	99213087
Chr01	49928229	49929543	Chr X	86397035	86395714
Chr01	49940527	49941711	Chr X	86384264	86383098
Chr01	49943033	49946477	Chr X	86381999	86378563
Chr01	49965512	49966801	Chr X	86354768	86353479
Chr01	49966800	49969218	Chr X	86352569	86350138
Chr01	49971216	49972772	Chr X	86348284	86346707
Chr01	49972494	49973999	Chr X	86346586	86345081
Chr01	50022816	50026906	Chr X	86297910	86293851
Chr01	50049073	50051463	Chr X	86270392	86268000
Chr01	50053848	50055931	Chr X	86264158	86262094
Chr01	50060136	50061664	Chr X	86258914	86257432
Chr01	50062475	50064918	Chr X	86256907	86254499
Chr01	50093951	50095057	Chr X	86224890	86223780
Chr01	50095945	50097369	Chr X	86223007	86221582
Chr01	50097431	50098886	Chr X	86221306	86219826
Chr01	50142794	50144033	Chr X	86164162	86162957
Chr01	50183399	50184909	Chr X	107265895	107267393
Chr01	50193068	50195313	Chr X	86129829	86127584
Chr01	50199225	50201339	Chr X	86122873	86120752
Chr01	50210881	50212391	Chr X	9992698	9991191
Chr01	50261500	50264372	Chr X	86062077	86059203
Chr01	50267223	50268765	Chr X	86057973	86056420
Chr01	50297240	50299994	Chr X	86004902	86007661
Chr01	50301304	50303935	Chr X	86008717	86011361
Chr01	50306385	50307742	Chr X	86014367	86015769
Chr01	50353439	50354567	Chr X	85851957	85853083
Chr01	50385449	50387641	Chr X	85925701	85923478
Chr01	50403615	50405042	Chr X	85945569	85944132
Chr01	50408540	50409720	Chr X	85939449	85938251
Chr01	50499993	50501620	Chr X	85748032	85746407
Chr01	50591836	50594002	Chr X	85638324	85636152
Chr01	50594301	50598240	Chr X	85636140	85632156
Chr01	50605541	50607781	Chr X	85626157	85623924
Chr01	50607773	50608961	Chr X	85622795	85621610
Chr01	50696459	50702638	Chr X	85566525	85560382
Chr01	50705606	50709323	Chr X	85557365	85553630
Chr01	50709866	50714550	Chr X	85553637	85549000
Chr01	50716969	50719465	Chr X	85547843	85545372
Chr01	50722986	50726764	Chr X	85541641	85537900
Chr01	50764705	50767786	Chr X	85499463	85496365
Chr01	50783691	50784941	Chr X	85478642	85477428
Chr01	50787017	50798878	Chr X	85475301	85463473
Chr01	50800684	50805367	Chr X	85461546	85456834
Chr01	50807048	50812741	Chr X	85454962	85449283
Chr01	50843601	50845917	Chr X	85396709	85394425
Chr01	50892188	50893217	Chr X	85344746	85343711
Chr01	50912859	50915355	Chr X	85325624	85323092
Chr01	50952338	50954432	Chr X	85288122	85286028
Chr01	50968134	50969580	Chr X	85270412	85268974
Chr01	50969569	50971954	Chr X	85268686	85266363
Chr01	50979953	50981350	Chr X	85258645	85257261
Chr01	50981364	50983175	Chr X	85256196	85254424
Chr01	50983167	50984921	Chr X	85253210	85251474
Chr01	50998470	51000422	Chr X	85234575	85232632
Chr01	51029285	51031706	Chr X	85195150	85197599
Chr01	51033155	51037020	Chr X	85198641	85202531
Chr01	51054160	51055224	Chr X	85161599	85160501
Chr01	51071484	51075540	Chr X	85151032	85146916
Chr01	51077166	51082123	Chr X	85145894	85140918
Chr01	51097752	51100414	Chr X	85123433	85120773
Chr01	51100655	51103949	Chr X	85120713	85117403
Chr01	51109729	51111646	Chr X	85111584	85109658
Chr01	51117083	51118860	Chr X	85102295	85100550
Chr01	51120690	51125338	Chr X	85099584	85094877
Chr01	51138133	51140494	Chr X	85085028	85082656
Chr01	51170781	51172939	Chr X	82776541	82774337
Chr01	51173880	51174924	Chr X	82772737	82771697
Chr01	51199819	51203482	Chr X	82704844	82708512
Chr01	51207967	51213618	Chr X	82712810	82718531
Chr01	51236670	51242998	Chr X	82740764	82747128
Chr01	51252011	51253155	Chr X	82792551	82793691
Chr01	51254318	51255818	Chr X	82794641	82796150
Chr01	51267310	51271737	Chr X	82805882	82810398
Chr01	51330519	51332604	Chr X	82920743	82922837
Chr01	51333884	51335546	Chr X	82924582	82926174
Chr01	51342638	51345998	Chr X	82932634	82936005
Chr01	51376943	51379217	Chr X	82968265	82970526
Chr01	51393276	51396299	Chr X	82990350	82993437
Chr01	51416680	51424204	Chr X	83014052	83021678
Chr01	51783190	51784755	Chr X	37496327	37494759
Chr01	51857266	51859593	Chr X	83086015	83088318
Chr01	51888505	51891477	Chr X	83116689	83119682
Chr01	51894690	51898851	Chr X	83123733	83127930
Chr01	51902955	51907482	Chr X	83131116	83135648
Chr01	51907725	51909821	Chr X	83135636	83137724
Chr01	51938943	51942645	Chr X	83169251	83172923
Chr01	51949272	51950827	Chr X	83179637	83181197
Chr01	52013987	52016388	Chr X	83257321	83259772
Chr01	52036328	52038404	Chr X	83281444	83283495
Chr01	52067506	52069338	Chr X	83320029	83321853
Chr01	52132662	52133829	Chr X	83382916	83384091
Chr01	52138966	52143095	Chr X	83389128	83393256
Chr01	52161214	52163442	Chr X	83411753	83413991
Chr01	52167181	52168334	Chr X	83419214	83420354
Chr01	52173890	52175434	Chr X	83426074	83427586
Chr01	52175454	52176717	Chr X	83427807	83429066
Chr01	52177352	52178363	Chr X	83431414	83432428
Chr01	52178391	52184252	Chr X	83432872	83438668
Chr01	52279319	52281464	Chr X	83507860	83510031
Chr01	52288118	52289636	Chr X	83515943	83517480
Chr01	52300250	52303481	Chr X	83528739	83531960
Chr01	52307437	52310310	Chr X	83535755	83538640
Chr01	52315275	52316856	Chr X	83548286	83549878
Chr01	52323992	52327311	Chr X	83562119	83565485
Chr01	52327311	52328311	Chr X	83565578	83566598
Chr01	52332258	52333668	Chr X	83570202	83571615
Chr01	52333820	52341789	Chr X	83571684	83579644
Chr01	52354280	52356194	Chr X	83600431	83602362
Chr01	52397922	52401474	Chr X	83642100	83645633
Chr01	52425437	52429859	Chr X	83668169	83672608
Chr01	52431125	52432554	Chr X	83672611	83674064
Chr01	52443153	52445097	Chr X	83684907	83686861
Chr01	52489258	52490499	Chr X	83740366	83741596
Chr01	52507490	52510445	Chr X	83750293	83753255
Chr01	52525907	52529093	Chr X	83777597	83780719
Chr01	52535251	52536726	Chr X	83786854	83788322
Chr01	52561262	52562549	Chr X	83815345	83816629
Chr01	52765926	52771571	Chr X	83999315	84004937
Chr01	52775222	52778737	Chr X	84008029	84011555
Chr01	52793796	52795765	Chr X	84026514	84028493
Chr01	52862350	52864493	Chr X	84050619	84052742
Chr01	52869799	52871796	Chr X	84067264	84069242
Chr01	52880675	52884372	Chr X	84078770	84082510
Chr01	52903840	52906806	Chr X	84106897	84109858
Chr01	52907136	52909335	Chr X	84110617	84112834
Chr01	52925230	52926257	Chr X	84130024	84131057
Chr01	52943129	52945098	Chr X	84151076	84153081
Chr01	53025675	53027766	Chr X	84260099	84262203
Chr01	53036817	53042019	Chr X	84272356	84277507
Chr01	53043712	53046904	Chr X	84279256	84282480
Chr01	53054111	53056353	Chr X	84290024	84292238
Chr01	53063753	53067106	Chr X	84299561	84302884
Chr01	53069201	53072954	Chr X	84304052	84307824
Chr01	53089619	53090899	Chr X	84324478	84325776
Chr01	53090898	53094799	Chr X	84325865	84329794
Chr01	53195446	53197267	Chr X	84424967	84426792
Chr01	53215010	53217025	Chr X	84451318	84453347
Chr01	53217222	53222932	Chr X	84453548	84459196
Chr01	53226882	53230499	Chr X	84459209	84462807
Chr01	53248339	53250931	Chr X	84490265	84492863
Chr01	53252365	53254927	Chr X	84494745	84497281
Chr01	53259415	53261653	Chr X	84498495	84500711
Chr01	53261652	53263683	Chr X	84501220	84503252
Chr01	53269233	53270388	Chr X	84511162	84512343
Chr01	53326344	53328760	Chr X	84545127	84542714
Chr01	53403675	53408473	Chr X	84681924	84686715
Chr01	53410238	53411405	Chr X	84689291	84690459
Chr01	53417936	53419281	Chr X	84696503	84697856
Chr01	53428069	53429565	Chr X	84706807	84708287
Chr01	53432214	53435097	Chr X	84711901	84714767
Chr01	53454594	53456640	Chr X	84736385	84734302
Chr01	53481509	53482566	Chr X	84754250	84755289
Chr01	53510880	53514002	Chr X	84778732	84781869
Chr01	53520301	53524880	Chr X	84789509	84794117
Chr01	53576997	53579229	Chr X	84845129	84847344
Chr01	53660460	53662949	Chr X	84908015	84910509
Chr01	53674820	53678394	Chr X	84596191	84599767
Chr01	53698847	53700294	Chr X	84930780	84932223
Chr01	53701003	53702352	Chr X	84932254	84933612
Chr01	53729219	53732523	Chr X	84978528	84981902
Chr01	53762302	53763769	Chr X	85039262	85040728
Chr01	53770353	53772086	Chr X	85053984	85055713
Chr01	53778464	53781193	Chr X	85061607	85064323
Chr01	53787760	53789936	Chr X	85069998	85072163
Chr01	53808633	53812436	Chr X	82687738	82683875
Chr01	53824434	53826464	Chr X	82645914	82643900
Chr01	53858687	53861325	Chr X	82613922	82611309
Chr01	53862865	53864056	Chr X	82610084	82608891
Chr01	53866064	53868616	Chr X	82606936	82604377
Chr01	53870129	53875390	Chr X	82602049	82596768
Chr01	53877786	53880363	Chr X	82594712	82592113
Chr01	53885978	53888132	Chr X	82585697	82583535
Chr01	53894261	53905677	Chr X	82577051	82565586
Chr01	53922469	53928061	Chr X	82546088	82540505
Chr01	53928283	53934961	Chr X	82540258	82533593
Chr01	53943751	53948088	Chr X	82526664	82522398
Chr01	53967917	53970630	Chr X	82506271	82503570
Chr01	53981105	53983665	Chr X	82491881	82489334
Chr01	53987286	53991694	Chr X	82486995	82482583
Chr01	53997613	54005149	Chr X	82474919	82467390
Chr01	54023440	54025059	Chr X	82449889	82448243
Chr01	54084752	54086358	Chr X	82423569	82421980
Chr01	54091825	54094327	Chr X	82418884	82416387
Chr01	54108677	54114173	Chr X	82394572	82389081
Chr01	54117396	54125353	Chr X	82383142	82375197
Chr01	54128551	54131349	Chr X	82371879	82369079
Chr01	54132760	54135432	Chr X	82366692	82364025
Chr01	54143448	54147191	Chr X	82355606	82351862
Chr01	54147938	54151212	Chr X	82351180	82347927
Chr01	54152236	54154168	Chr X	82346944	82345019
Chr01	54155629	54159201	Chr X	82345017	82341434
Chr01	54159426	54162870	Chr X	82341407	82337979
Chr01	54163873	54165908	Chr X	82336333	82334353
Chr01	54166978	54172537	Chr X	82331420	82325845
Chr01	54173628	54174690	Chr X	82325065	82324004
Chr01	54174681	54176969	Chr X	82323340	82321055
Chr01	54176969	54190873	Chr X	82320902	82307009
Chr01	54226847	54228587	Chr X	82258156	82256429
Chr01	54241584	54244960	Chr X	82243926	82240509
Chr01	54395940	54397039	Chr X	82164323	82163208
Chr01	54405149	54407266	Chr X	82155092	82152970
Chr01	54411424	54414412	Chr X	82146925	82143924
Chr01	54434074	54435894	Chr X	82119543	82117731
Chr01	54443786	54446606	Chr X	82102399	82099589
Chr01	54465631	54467171	Chr X	82086598	82085069
Chr01	54467168	54469210	Chr X	82084516	82082484
Chr01	54471055	54472922	Chr X	82079962	82078099
Chr01	54481601	54483023	Chr X	82074200	82072771
Chr01	54484496	54488570	Chr X	82072695	82068684
Chr01	54505342	54506873	Chr X	82051706	82050165
Chr01	54511381	54513805	Chr X	82046755	82044338
Chr01	54529459	54531372	Chr X	82017582	82015661
Chr01	54531501	54532806	Chr X	82013219	82011912
Chr01	54533409	54536879	Chr X	82011234	82007705
Chr01	54537929	54539221	Chr X	82006734	82005444
Chr01	54551932	54554294	Chr X	81980987	81978577
Chr01	54559845	54564187	Chr X	81971521	81967203
Chr01	54579101	54580288	Chr X	37995534	37994335
Chr01	54579665	54581695	Chr X	41390219	41392252
Chr01	54583027	54586300	Chr X	81951246	81948050
Chr01	54605979	54608980	Chr X	81917071	81914049
Chr01	54612980	54617774	Chr X	81912563	81907796
Chr01	54620918	54624427	Chr X	81903731	81900098
Chr01	54624636	54625904	Chr X	81899928	81898638
Chr01	54626193	54630533	Chr X	81898242	81893878
Chr01	54636082	54637476	Chr X	81887703	81886310
Chr01	54641774	54644246	Chr X	81881281	81878756
Chr01	54695550	54698774	Chr X	81806573	81803348
Chr01	54699896	54701090	Chr X	81801952	81800735
Chr01	54721229	54724534	Chr X	81774177	81770866
Chr01	54785632	54792380	Chr X	81712810	81706098
Chr01	54819100	54820282	Chr X	81673568	81672393
Chr01	54852637	54854803	Chr X	81652872	81650690
Chr01	54899876	54902627	Chr X	81604183	81606945
Chr01	54903516	54905072	Chr X	81608595	81610148
Chr01	54967326	54969329	Chr X	81536645	81534676
Chr01	54981804	54982953	Chr X	81520622	81519465
Chr01	54996680	54997764	Chr X	81506374	81505296
Chr01	55046028	55047623	Chr X	81443837	81442244
Chr01	55187832	55189094	Chr X	81271954	81270707
Chr01	55191844	55193594	Chr X	81267848	81266087
Chr01	55272357	55273903	Chr X	81192198	81190639
Chr01	55341566	55342818	Chr X	81117405	81116145
Chr01	55363066	55364800	Chr X	81096719	81094945
Chr01	55406090	55407523	Chr X	81052132	81050675
Chr01	55457878	55459052	Chr X	80999857	80998701
Chr01	55477111	55478162	Chr X	80977672	80976608
Chr01	55487156	55489355	Chr X	80966560	80964392
Chr01	55580351	55582162	Chr X	80879807	80877963
Chr01	55603347	55605277	Chr X	80854622	80852666
Chr01	55608557	55611688	Chr X	80848977	80845816
Chr01	55612541	55614314	Chr X	80845135	80843352
Chr01	55645127	55646993	Chr X	60772916	60774788
Chr01	55649763	55652496	Chr X	80810901	80808129
Chr01	55653834	55655222	Chr X	80808132	80806725
Chr01	55674948	55677728	Chr X	80784738	80781989
Chr01	55683636	55684691	Chr X	80776844	80775791
Chr01	55691748	55693434	Chr X	80769166	80767480
Chr01	55693672	55696702	Chr X	80767239	80764172
Chr01	55701952	55703038	Chr X	80759578	80758481
Chr01	55744620	55747980	Chr X	80708263	80704893
Chr01	55785539	55789045	Chr X	80670127	80666597
Chr01	55800874	55807160	Chr X	80655935	80649666
Chr01	55807357	55809743	Chr X	80648810	80646388
Chr01	55812002	55814234	Chr X	80645678	80643470
Chr01	55862624	55865305	Chr X	80588743	80585973
Chr01	55879981	55881988	Chr X	80573407	80571377
Chr01	55887115	55891733	Chr X	80566104	80561437
Chr01	55893987	55908412	Chr X	80558603	80544058
Chr01	55917487	55918540	Chr X	80537778	80536717
Chr01	55923417	55925589	Chr X	80526333	80524152
Chr01	55972367	55975197	Chr X	80501472	80498613
Chr01	55979985	55982728	Chr X	80494447	80491681
Chr01	55984971	55987172	Chr X	80489661	80487458
Chr01	55990393	55993905	Chr X	80482732	80479231
Chr01	55993909	55995095	Chr X	80478509	80477312
Chr01	55995100	55998998	Chr X	80476641	80472653
Chr01	56009464	56011643	Chr X	80461583	80459408
Chr01	56012043	56014102	Chr X	80459009	80456949
Chr01	56014610	56017134	Chr X	80456468	80453939
Chr01	56024398	56026852	Chr X	80442699	80440251
Chr01	56032641	56037098	Chr X	80435151	80430649
Chr01	56037669	56038754	Chr X	80430030	80428966
Chr01	56044098	56047059	Chr X	80424328	80421331
Chr01	56049408	56054752	Chr X	80419208	80413855
Chr01	56089049	56090416	Chr X	80386155	80384767
Chr01	56107030	56110892	Chr X	80353894	80350060
Chr01	56111134	56112371	Chr X	80349825	80348551
Chr01	56112371	56118515	Chr X	80348463	80342353
Chr01	56119941	56122035	Chr X	80340938	80338841
Chr01	56143103	56145130	Chr X	80320314	80318264
Chr01	56145565	56147536	Chr X	80318231	80316242
Chr01	56147665	56148952	Chr X	80316145	80314839
Chr01	56166879	56217401	Chr X	80299249	80248606
Chr01	56217754	56235501	Chr X	80248616	80230828
Chr01	56239588	56247356	Chr X	80230831	80223120
Chr01	56247829	56278875	Chr X	80222759	80191566
Chr01	56296313	56297857	Chr X	80117914	80119447
Chr01	56299214	56302248	Chr X	80120570	80123570
Chr01	56303047	56306808	Chr X	80123903	80127708
Chr01	56310336	56315578	Chr X	80131454	80136707
Chr01	56323960	56330707	Chr X	80144984	80151759
Chr01	56338563	56341047	Chr X	80156754	80159269
Chr01	56367467	56370878	Chr X	80046705	80043273
Chr01	56404543	56405550	Chr X	80008982	80007946
Chr01	56408554	56422800	Chr X	80002965	79988679
Chr01	56424001	56425794	Chr X	79987613	79985813
Chr01	56430040	56438973	Chr X	79981705	79972658
Chr01	56439760	56441864	Chr X	79972050	79969952
Chr01	56442797	56453820	Chr X	79969349	79958241
Chr01	56787840	56789718	Chr X	79873549	79871664
Chr01	56818418	56823142	Chr X	79858931	79854222
Chr01	56827316	56831341	Chr X	79845648	79841617
Chr01	56838849	56842273	Chr X	79834482	79831061
Chr01	56847956	56849935	Chr X	79822152	79820186
Chr01	56850985	56854135	Chr X	79819878	79816712
Chr01	56860131	56862772	Chr X	79811211	79808551
Chr01	56889762	56894326	Chr X	79790138	79785551
Chr01	56896071	56900638	Chr X	79783941	79779361
Chr01	56908601	56911321	Chr X	79768671	79765945
Chr01	56914052	56917922	Chr X	79765753	79761810
Chr01	56921550	56923073	Chr X	79757302	79755777
Chr01	56923067	56927657	Chr X	79755741	79751160
Chr01	56939093	56940311	Chr X	6521626	6520407
Chr01	56958452	56963333	Chr X	79731004	79726067
Chr01	56970009	56976602	Chr X	79720643	79714024
Chr01	56977412	56983597	Chr X	79713283	79707089
Chr01	57010632	57014236	Chr X	79679453	79675851
Chr01	57015519	57021647	Chr X	79674256	79668085
Chr01	57021992	57023065	Chr X	79667546	79666448
Chr01	57023863	57026230	Chr X	79665642	79663301
Chr01	57027104	57033406	Chr X	79661769	79655482
Chr01	57053106	57057732	Chr X	79619587	79614950
Chr01	57060912	57064876	Chr X	79611902	79607992
Chr01	57095495	57100786	Chr X	79581008	79575727
Chr01	57100786	57105192	Chr X	79575631	79571192
Chr01	57106890	57113238	Chr X	79570003	79563637
Chr01	57114382	57140673	Chr X	79562617	79536523
Chr01	57171287	57175209	Chr X	79482884	79478930
Chr01	57186181	57187679	Chr X	79467927	79466413
Chr01	57194097	57200968	Chr X	79451150	79444258
Chr01	57200965	57208806	Chr X	79444103	79436228
Chr01	57226697	57233956	Chr X	79413869	79406550
Chr01	57238647	57244597	Chr X	79401681	79395676
Chr01	57245723	57254673	Chr X	79395681	79386615
Chr01	57256465	57265382	Chr X	79384814	79375910
Chr01	57294583	57296174	Chr X	79347421	79345837
Chr01	57296179	57301624	Chr X	79345595	79340067
Chr01	57382851	57385495	Chr X	79284313	79281692
Chr01	57398942	57403808	Chr X	79268323	79263409
Chr01	57404388	57410429	Chr X	79263418	79257317
Chr01	57413070	57424296	Chr X	79254246	79243033
Chr01	57431381	57432965	Chr X	79237800	79236203
Chr01	57465535	57469820	Chr X	79166520	79170805
Chr01	57474364	57475704	Chr X	79174545	79175889
Chr01	57525648	57526715	Chr X	79138193	79137124
Chr01	57557269	57558674	Chr X	79104080	79102673
Chr01	57567960	57570074	Chr X	79090087	79087948
Chr01	57586722	57587732	Chr X	79073082	79072068
Chr01	57603282	57605283	Chr X	79032015	79030032
Chr01	57633581	57634589	Chr X	79004090	79003081
Chr01	57655441	57658716	Chr X	78982074	78978776
Chr01	57665931	57669306	Chr X	78970033	78966634
Chr01	57804751	57806169	Chr X	78860107	78858704
Chr01	57820863	57825924	Chr X	78846920	78841890
Chr01	57861087	57863313	Chr X	78828829	78826617
Chr01	57947692	57951518	Chr X	78705400	78701568
Chr01	57977269	57979146	Chr X	78670024	78668163
Chr01	58000327	58007517	Chr X	78646442	78639300
Chr01	58007527	58009820	Chr X	78639177	78636824
Chr01	58033163	58035439	Chr X	78612468	78610225
Chr01	58070838	58071897	Chr X	78577356	78576284
Chr01	58072994	58076277	Chr X	78575213	78571903
Chr01	58077686	58080812	Chr X	78570507	78567299
Chr01	58113522	58115713	Chr X	78522614	78520473
Chr01	58116312	58119814	Chr X	78519866	78516349
Chr01	58123929	58127253	Chr X	78512279	78508918
Chr01	58168030	58171290	Chr X	78468926	78465658
Chr01	58173307	58175763	Chr X	78464522	78462060
Chr01	58178612	58179803	Chr X	78458102	78456901
Chr01	58181525	58184135	Chr X	78455983	78453346
Chr01	58200870	58202665	Chr X	78423627	78421803
Chr01	58206589	58208180	Chr X	78417189	78415616
Chr01	58218852	58221651	Chr X	78403694	78400893
Chr01	58222266	58223425	Chr X	78400360	78399208
Chr01	58227861	58229218	Chr X	78395883	78394508
Chr01	58238208	58239473	Chr X	78384733	78383493
Chr01	58302998	58304278	Chr X	78309087	78307781
Chr01	58345501	58346824	Chr X	78264705	78263359
Chr01	58442510	58445188	Chr X	78155245	78152553
Chr01	58448295	58453490	Chr X	78149252	78144004
Chr01	58456640	58459513	Chr X	78141206	78138329
Chr01	58479215	58489962	Chr X	78118390	78107632
Chr01	58542700	58545103	Chr X	78082805	78085229
Chr01	58549124	58553145	Chr X	78025718	78029795
Chr01	58555418	58557058	Chr X	111399440	111397804
Chr01	58638539	58640257	Chr X	77923791	77922061
Chr01	58654830	58656277	Chr X	77902314	77900868
Chr01	58656411	58658831	Chr X	58994616	58992211
Chr01	58664226	58667942	Chr X	77898333	77894614
Chr01	58689793	58692993	Chr X	77872178	77868952
Chr01	58695283	58697634	Chr X	77867196	77864820
Chr01	58707527	58714922	Chr X	77848483	77841072
Chr01	58779883	58782259	Chr X	77786002	77783591
Chr01	58898141	58899369	Chr X	77658080	77656845
Chr01	59120324	59122712	Chr X	77636473	77634073
Chr01	59126086	59127954	Chr X	77632207	77630319
Chr01	59129297	59130856	Chr X	77629138	77627574
Chr01	59170013	59171513	Chr X	77097108	77098648
Chr01	59192662	59195690	Chr X	77115706	77118675
Chr01	59196332	59198325	Chr X	77119546	77121519
Chr01	59219407	59221496	Chr X	77146121	77148221
Chr01	59226498	59227712	Chr X	77154390	77155593
Chr01	59228784	59230569	Chr X	77156731	77158520
Chr01	59248049	59250134	Chr X	77174791	77176831
Chr01	59294736	59296670	Chr X	77222358	77224283
Chr01	59307266	59308907	Chr X	77231318	77232949
Chr01	59316371	59317597	Chr X	77245171	77246417
Chr01	59330769	59332071	Chr X	77258325	77259618
Chr01	59339609	59341082	Chr X	77274525	77276009
Chr01	59345408	59348333	Chr X	77280176	77283130
Chr01	59383823	59391712	Chr X	77323731	77331618
Chr01	59393430	59400459	Chr X	77332001	77339087
Chr01	59585511	59586825	Chr X	77515832	77517168
Chr01	59674308	59675944	Chr X	77605251	77606837
Chr01	59691153	59693753	Chr X	77620636	77623244
Chr01	59695466	59696809	Chr X	77052052	77050706
Chr01	59710785	59712851	Chr X	77043945	77041878
Chr01	59716147	59719371	Chr X	77039109	77035905
Chr01	59747234	59749643	Chr X	76728382	76730824
Chr01	59751693	59753015	Chr X	76734395	76735731
Chr01	59818541	59821093	Chr X	76814246	76816836
Chr01	59869017	59871737	Chr X	76872643	76875381
Chr01	59886082	59890734	Chr X	76894228	76898902
Chr01	59899089	59900313	Chr X	76911503	76912734
Chr01	59924059	59928625	Chr X	76680826	76676258
Chr01	59979692	59981627	Chr X	76631320	76629346
Chr01	59981968	59990264	Chr X	76629300	76621090
Chr01	59998876	60001299	Chr X	76612416	76610002
Chr01	60001785	60007775	Chr X	76609412	76603432
Chr01	60009865	60014072	Chr X	76597067	76592847
Chr01	60020860	60026908	Chr X	76586855	76580853
Chr01	60036767	60041648	Chr X	76572945	76568068
Chr01	60048295	60050286	Chr X	76565642	76563681
Chr01	60077258	60078834	Chr X	76536444	76534888
Chr01	60084441	60087190	Chr X	76530361	76527608
Chr01	60093573	60095602	Chr X	76461175	76463218
Chr01	60095665	60096824	Chr X	76463434	76464590
Chr01	60097214	60101704	Chr X	76465500	76469959
Chr01	60102405	60103421	Chr X	76470767	76471787
Chr01	60104709	60106751	Chr X	76473492	76475535
Chr01	60116274	60117278	Chr X	76481493	76482495
Chr01	60124235	60127193	Chr X	76493558	76496491
Chr01	60159752	60162636	Chr X	76374840	76377719
Chr01	60163724	60165613	Chr X	76378646	76380519
Chr01	60175470	60178312	Chr X	76392339	76395165
Chr01	60190544	60192008	Chr X	76407403	76408879
Chr01	60192003	60195239	Chr X	76409716	76412983
Chr01	60234884	60236053	Chr X	76335208	76334078
Chr01	60243379	60245006	Chr X	76326360	76324725
Chr01	60278597	60281470	Chr X	76292219	76289360
Chr01	60316272	60318303	Chr X	76253334	76251299
Chr01	60392463	60395907	Chr X	76174833	76171380
Chr01	60401372	60403294	Chr X	76163838	76161917
Chr01	60415238	60418666	Chr X	76150088	76146695
Chr01	60424394	60429917	Chr X	76140988	76135474
Chr01	60429328	60430459	Chr X	49140712	49141844
Chr01	60430169	60431796	Chr X	76135035	76133419
Chr01	60433093	60434217	Chr X	76133016	76131886
Chr01	60434396	60437992	Chr X	76131610	76128029
Chr01	60446366	60448542	Chr X	76121238	76119057
Chr01	60449850	60451735	Chr X	76116359	76114489
Chr01	60458339	60459760	Chr X	76106333	76104886
Chr01	60478606	60482597	Chr X	76081207	76077217
Chr01	60542893	60544234	Chr X	75982785	75981441
Chr01	60544225	60546602	Chr X	75981156	75978750
Chr01	60549850	60553403	Chr X	75974815	75971224
Chr01	60566358	60568008	Chr X	75952204	75950528
Chr01	60583776	60604450	Chr X	75927743	75907345
Chr01	60610343	60611962	Chr X	75901057	75899429
Chr01	60615291	60616685	Chr X	75894839	75893421
Chr01	60623627	60627894	Chr X	75886098	75881859
Chr01	60648342	60652307	Chr X	75857710	75853710
Chr01	60652685	60654271	Chr X	75853408	75851806
Chr01	60669524	60670758	Chr X	75816320	75817552
Chr01	60672699	60674660	Chr X	75819532	75821498
Chr01	60752020	60753672	Chr X	75792337	75794000
Chr01	60834661	60840382	Chr X	75684094	75678376
Chr01	60840731	60842848	Chr X	75676825	75674671
Chr01	60844718	60845801	Chr X	75673451	75672348
Chr01	60852765	60856524	Chr X	75661730	75657999
Chr01	60857940	60860652	Chr X	75655731	75652962
Chr01	60861290	60862575	Chr X	75651191	75649897
Chr01	60862880	60865168	Chr X	75649599	75647286
Chr01	60867002	60868977	Chr X	75645422	75643442
Chr01	60871299	60875096	Chr X	75631949	75628159
Chr01	60883171	60884542	Chr X	75621252	75619868
Chr01	60886189	60889285	Chr X	75618868	75615827
Chr01	60889287	60890468	Chr X	75615326	75614156
Chr01	61029529	61030550	Chr X	75428083	75427050
Chr01	61043005	61044160	Chr X	75406271	75405129
Chr01	61051592	61053481	Chr X	75389135	75387282
Chr01	61054920	61060776	Chr X	75385862	75379946
Chr01	61072424	61073548	Chr X	75370250	75369098
Chr01	61088158	61094295	Chr X	75357331	75351125
Chr01	61094455	61097310	Chr X	75350970	75348103
Chr01	61097326	61100215	Chr X	75346825	75343951
Chr01	61135396	61140205	Chr X	75304061	75299215
Chr01	61220257	61221285	Chr X	75215584	75214562
Chr01	61438446	61439564	Chr X	75008923	75007779
Chr01	61495762	61500666	Chr X	74947959	74943014
Chr01	61500666	61505275	Chr X	74942839	74938175
Chr01	61513767	61515122	Chr X	74929349	74927955
Chr01	61524900	61527526	Chr X	74906475	74903858
Chr01	61533966	61535954	Chr X	74894379	74892413
Chr01	61567247	61570997	Chr X	74821781	74818006
Chr01	61576592	61578094	Chr X	35538690	35540187
Chr01	61579717	61581766	Chr X	74813789	74811734
Chr01	61596884	61599575	Chr X	74792455	74789770
Chr01	61635403	61639607	Chr X	74751974	74747718
Chr01	61639608	61642911	Chr X	74746955	74743639
Chr01	61700853	61704268	Chr X	74648523	74645053
Chr01	61705263	61715520	Chr X	74644355	74634032
Chr01	61716000	61727766	Chr X	74633555	74621933
Chr01	61741116	61752370	Chr X	74608809	74597533
Chr01	61763251	61772152	Chr X	74577282	74568347
Chr01	61772669	61774128	Chr X	74419183	74420650
Chr01	61774973	61779838	Chr X	74567413	74562581
Chr01	61793908	61798407	Chr X	74548225	74543696
Chr01	61856966	61858096	Chr X	74488582	74487480
Chr01	61860043	61861336	Chr X	74485803	74484486
Chr01	61937476	61938748	Chr X	74430015	74428754
Chr01	61984924	61987563	Chr X	74374719	74372081
Chr01	62050589	62053969	Chr X	74276732	74273309
Chr01	62065891	62069789	Chr X	74263928	74259993
Chr01	62169815	62171148	Chr X	74167637	74166300
Chr01	62192249	62194057	Chr X	74143610	74141782
Chr01	62245111	62248330	Chr X	74097569	74094342
Chr01	62299434	62301405	Chr X	74005303	74003376
Chr01	62349360	62350504	Chr X	73963597	73962455
Chr01	62402319	62404671	Chr X	73888018	73885639
Chr01	62429042	62432633	Chr X	73863543	73859868
Chr01	62477123	62479305	Chr X	73812945	73810772
Chr01	62499276	62507712	Chr X	73789322	73780943
Chr01	62508249	62509520	Chr X	73780224	73778945
Chr01	62909527	62912668	Chr X	73657266	73654140
Chr01	62925906	62927056	Chr X	73729064	73727908
Chr01	62974670	62977630	Chr X	73595301	73592336
Chr01	62977838	62992439	Chr X	73591672	73577038
Chr01	62994832	63000221	Chr X	73574709	73569325
Chr01	63015047	63017092	Chr X	73555868	73553843
Chr01	63027353	63028426	Chr X	73544456	73543368
Chr01	63040729	63045073	Chr X	73529312	73524955
Chr01	63067598	63070095	Chr X	73500160	73497605
Chr01	63103994	63106847	Chr X	73463064	73460229
Chr01	63114070	63115332	Chr X	73449572	73448307
Chr01	63148056	63149566	Chr X	73416067	73414581
Chr01	63184854	63186173	Chr X	73380409	73379116
Chr01	63186306	63188038	Chr X	73378881	73377176
Chr01	63188520	63190924	Chr X	73377171	73374766
Chr01	63193785	63197672	Chr X	73371919	73368028
Chr01	63228212	63229994	Chr X	73330628	73328833
Chr01	63275601	63278070	Chr X	73260338	73257816
Chr01	63290127	63297025	Chr X	73245952	73239056
Chr01	63297645	63299437	Chr X	73238432	73236613
Chr01	63303565	63305053	Chr X	73233212	73231732
Chr01	63313834	63319693	Chr X	73222400	73216472
Chr01	63322620	63331132	Chr X	73213530	73204966
Chr01	63331286	63333705	Chr X	73204964	73202642
Chr01	63334987	63359352	Chr X	73201287	73176990
Chr01	63368827	63375282	Chr X	73167574	73161157
Chr01	63375624	63378571	Chr X	73160620	73157642
Chr01	63386951	63389297	Chr X	93798950	93796545
Chr01	63408486	63410289	Chr X	73123910	73122127
Chr01	63556081	63557302	Chr X	72952131	72950909
Chr01	63576299	63580162	Chr X	72929774	72933627
Chr01	63618709	63620070	Chr X	72907727	72909070
Chr01	63626949	63628348	Chr X	72877813	72876421
Chr01	63643431	63644899	Chr X	72861871	72860411
Chr01	63693463	63694509	Chr X	72811950	72810881
Chr01	63713808	63716272	Chr X	72762063	72759602
Chr01	63716272	63721311	Chr X	72758199	72753133
Chr01	63735712	63737559	Chr X	72731514	72729686
Chr01	63770783	63772165	Chr X	72709092	72707729
Chr01	63830969	63832113	Chr X	72648200	72649350
Chr01	63929011	63930973	Chr X	72560478	72562472
Chr01	63933432	63935520	Chr X	72510290	72508204
Chr01	63937643	63939031	Chr X	72506597	72505194
Chr01	63984865	63987142	Chr X	72465075	72462757
Chr01	64000072	64004153	Chr X	72371876	72375972
Chr01	64010949	64013835	Chr X	72383328	72386227
Chr01	64016445	64018850	Chr X	72389712	72392099
Chr01	64024345	64026789	Chr X	72336609	72339104
Chr01	64081938	64083857	Chr X	72185985	72187890
Chr01	64086230	64093633	Chr X	72190795	72198191
Chr01	64094489	64098127	Chr X	72198843	72202400
Chr01	64098273	64101278	Chr X	72202402	72205457
Chr01	64106655	64110756	Chr X	72210718	72214825
Chr01	64117152	64118279	Chr X	72220517	72221643
Chr01	64120343	64134748	Chr X	72223692	72238106
Chr01	64151567	64154809	Chr X	72254900	72258114
Chr01	64212176	64216222	Chr X	72123720	72119672
Chr01	64217248	64218809	Chr X	72118775	72117202
Chr01	64236725	64241917	Chr X	72095715	72090509
Chr01	64243333	64244501	Chr X	72085899	72084696
Chr01	64255617	64256661	Chr X	72074444	72073412
Chr01	64263708	64266215	Chr X	72067850	72065300
Chr01	64277281	64278729	Chr X	72055980	72054551
Chr01	64285850	64287856	Chr X	72047529	72045528
Chr01	64289141	64292791	Chr X	72043808	72040192
Chr01	64311364	64314036	Chr X	72017863	72015246
Chr01	64315415	64327158	Chr X	72013850	72002127
Chr01	64327469	64330600	Chr X	72001904	71998754
Chr01	64335354	64339371	Chr X	71994256	71990203
Chr01	64342190	64348892	Chr X	71987048	71980248
Chr01	64349241	64351857	Chr X	71979718	71977091
Chr01	64353013	64361027	Chr X	71976852	71968930
Chr01	64364797	64373220	Chr X	71965024	71956646
Chr01	64380226	64382934	Chr X	71949621	71946904
Chr01	64388426	64389785	Chr X	71943654	71942313
Chr01	64389782	64391146	Chr X	71942096	71940726
Chr01	64393578	64395846	Chr X	71938505	71936245
Chr01	64411554	64416021	Chr X	71919146	71914690
Chr01	64418983	64427656	Chr X	71911723	71902994
Chr01	64429025	64433921	Chr X	71901628	71896743
Chr01	64460484	64473458	Chr X	71864703	71851718
Chr01	64474356	64481511	Chr X	71850420	71843257
Chr01	64489558	64491046	Chr X	71832199	71830710
Chr01	64502650	64508686	Chr X	71817065	71811041
Chr01	64512069	64515634	Chr X	71808791	71805210
Chr01	64515795	64519557	Chr X	71646327	71650067
Chr01	64520434	64522746	Chr X	71754640	71756968
Chr01	64522847	64528082	Chr X	71756975	71762245
Chr01	64540750	64542141	Chr X	71773328	71774710
Chr01	64542132	64543208	Chr X	71777086	71778168
Chr01	64543650	64546728	Chr X	71778660	71781716
Chr01	64547340	64549489	Chr X	71781716	71783884
Chr01	64550162	64554402	Chr X	71784912	71789172
Chr01	64556441	64563815	Chr X	71791595	71799020
Chr01	64579356	64582105	Chr X	52673837	52676587
Chr01	64605373	64609197	Chr X	71746111	71742242
Chr01	64653581	64663846	Chr X	71720726	71710508
Chr01	64666118	64667565	Chr X	71707874	71706425
Chr01	64684277	64692042	Chr X	71687731	71679914
Chr01	64698484	64702651	Chr X	71672906	71668617
Chr01	64713387	64720743	Chr X	71659729	71652402
Chr01	64739121	64741011	Chr X	71627228	71625336
Chr01	64748231	64749453	Chr X	71618001	71616752
Chr01	64750502	64751936	Chr X	71615811	71614359
Chr01	64752544	64753946	Chr X	71614368	71612962
Chr01	64851456	64855604	Chr X	71516850	71512696
Chr01	64888639	64893342	Chr X	71496443	71491708
Chr01	64937390	64938563	Chr X	71468028	71466857
Chr01	64940609	64941825	Chr X	71464118	71462929
Chr01	64956996	64959770	Chr X	71444145	71441370
Chr01	65012566	65016107	Chr X	71383401	71379784
Chr01	65032321	65034423	Chr X	71368363	71366318
Chr01	65050669	65052710	Chr X	71350986	71348965
Chr01	65053103	65054617	Chr X	71348094	71346563
Chr01	65100865	65103042	Chr X	71308346	71306207
Chr01	65123783	65126475	Chr X	71295134	71292467
Chr01	65153887	65155116	Chr X	71260904	71259659
Chr01	65208451	65211709	Chr X	71182659	71179410
Chr01	65233871	65234982	Chr X	71162135	71161028
Chr01	65252844	65255804	Chr X	71140347	71137369
Chr01	65259907	65261155	Chr X	71130962	71129702
Chr01	65310960	65314540	Chr X	71074079	71070520
Chr01	65328312	65330353	Chr X	71054501	71052426
Chr01	65337509	65338900	Chr X	71045586	71044152
Chr01	65369020	65370268	Chr X	70989683	70988444
Chr01	65381767	65386857	Chr X	70978504	70973459
Chr01	65396076	65397624	Chr X	70961849	70960312
Chr01	65522872	65524764	Chr X	70811982	70810105
Chr01	65655446	65660491	Chr X	70766210	70761280
Chr01	65689231	65691804	Chr X	70729218	70726636
Chr01	65692760	65695159	Chr X	70725604	70723234
Chr01	65695277	65700940	Chr X	70723077	70717393
Chr01	65717652	65719819	Chr X	70699860	70697680
Chr01	65719823	65729913	Chr X	70697555	70687446
Chr01	65732860	65734495	Chr X	70684492	70682874
Chr01	65764827	65783009	Chr X	70652565	70634333
Chr01	65825981	65827394	Chr X	70595982	70594578
Chr01	65866799	65868420	Chr X	70524077	70522486
Chr01	65868843	65870149	Chr X	70521935	70520644
Chr01	65883154	65887317	Chr X	70511052	70506906
Chr01	65887756	65891938	Chr X	70505351	70501180
Chr01	65912818	65916590	Chr X	70474376	70470520
Chr01	65966666	65969623	Chr X	70422362	70419418
Chr01	65970076	65972500	Chr X	2385832	2388254
Chr01	65971965	65973386	Chr X	48955248	48953826
Chr01	65973387	65976919	Chr X	70419416	70415874
Chr01	65986536	65988567	Chr X	70408049	70406002
Chr01	66025080	66026869	Chr X	70376242	70374454
Chr01	66031670	66032917	Chr X	70371119	70369866
Chr01	66065728	66067163	Chr X	70335819	70334378
Chr01	66086776	66088909	Chr X	70314679	70312558
Chr01	66092624	66093921	Chr X	70306478	70305188
Chr01	66096087	66099393	Chr X	70303203	70299986
Chr01	66110057	66111371	Chr X	70291945	70290610
Chr01	66112197	66114931	Chr X	70290612	70287818
Chr01	66114932	66115936	Chr X	70287647	70286635
Chr01	66119323	66120640	Chr X	70284081	70282715
Chr01	66151630	66155266	Chr X	70236081	70232446
Chr01	66157525	66164600	Chr X	70229134	70222119
Chr01	66165659	66167728	Chr X	70220591	70218483
Chr01	66179891	66181108	Chr X	70200997	70199773
Chr01	66187746	66189833	Chr X	70197242	70195153
Chr01	66190481	66192448	Chr X	70194459	70192523
Chr01	66192791	66194329	Chr X	70192170	70190626
Chr01	66232860	66234887	Chr X	70144699	70142666
Chr01	66361237	66362256	Chr X	70063048	70062027
Chr01	66366867	66370727	Chr X	70057681	70053828
Chr01	66516552	66518231	Chr X	69905329	69903625
Chr01	66538026	66539423	Chr X	69885395	69884001
Chr01	66542811	66545097	Chr X	69882127	69879863
Chr01	66640047	66642063	Chr X	69775897	69773896
Chr01	66706943	66708713	Chr X	69699005	69697220
Chr01	66713558	66714889	Chr X	69692438	69691110
Chr01	66741867	66747790	Chr X	69665119	69659171
Chr01	66794420	66796549	Chr X	69606801	69604658
Chr01	66808438	66809693	Chr X	69595763	69594516
Chr01	66868608	66874491	Chr X	69527032	69521078
Chr01	66875543	66878253	Chr X	69516517	69513808
Chr01	66951357	66954828	Chr X	69438821	69435381
Chr01	66974420	66977215	Chr X	69409058	69406258
Chr01	66984599	66986283	Chr X	69399747	69398036
Chr01	67069527	67070665	Chr X	69317347	69316193
Chr01	67091377	67101415	Chr X	69299290	69289277
Chr01	67102940	67108853	Chr X	69286542	69280639
Chr01	67121292	67122434	Chr X	69268221	69267076
Chr01	67122872	67124732	Chr X	69266932	69265086
Chr01	67131182	67134382	Chr X	69252194	69249014
Chr01	67178197	67179899	Chr X	69204098	69202383
Chr01	67192885	67193911	Chr X	69189390	69188363
Chr01	67197382	67198842	Chr X	69186291	69184829
Chr01	67199043	67203889	Chr X	69184343	69179512
Chr01	67205775	67207583	Chr X	69178360	69176549
Chr01	67230292	67232608	Chr X	69121287	69118949
Chr01	67235630	67239263	Chr X	69113415	69109792
Chr01	67340351	67341711	Chr X	69013192	69011838
Chr01	67368942	67375232	Chr X	68988445	68982105
Chr01	67401584	67404606	Chr X	68958497	68955464
Chr01	67406899	67409893	Chr X	68954599	68951585
Chr01	67414140	67416007	Chr X	68949036	68947153
Chr01	67476626	67477837	Chr X	68924790	68923586
Chr01	67573448	67575387	Chr X	68808034	68806125
Chr01	67613566	67614955	Chr X	68770983	68769599
Chr01	67724767	67729431	Chr X	68668163	68663571
Chr01	67730394	67733589	Chr X	68660706	68657503
Chr01	67736240	67740911	Chr X	68657507	68652945
Chr01	67753066	67754315	Chr X	68627045	68628306
Chr01	67787432	67790847	Chr X	68607655	68604258
Chr01	67814817	67819037	Chr X	17704774	17709041
Chr01	67825385	67827726	Chr X	68573820	68571403
Chr01	67830428	67832151	Chr X	68570431	68568749
Chr01	67832279	67834955	Chr X	68568663	68565972
Chr01	67863788	67870919	Chr X	68533909	68526867
Chr01	67879211	67883891	Chr X	68525940	68521338
Chr01	67902813	67904363	Chr X	68496117	68494574
Chr01	67936882	67938128	Chr X	68464468	68463235
Chr01	67943642	67947087	Chr X	68457708	68454292
Chr01	67947956	67950663	Chr X	68453410	68450701
Chr01	68033722	68034982	Chr X	128965932	128967176
Chr01	68048752	68050691	Chr X	68316528	68314574
Chr01	68074912	68078198	Chr X	68287161	68283863
Chr01	68078191	68079533	Chr X	68283317	68281981
Chr01	68106703	68107834	Chr X	68248367	68247249
Chr01	68110721	68112772	Chr X	68243498	68241462
Chr01	68113159	68114876	Chr X	68241460	68239719
Chr01	68125179	68130345	Chr X	68226929	68221666
Chr01	68151019	68154377	Chr X	68203610	68200226
Chr01	68152721	68158834	Chr X	68123911	68130194
Chr01	68161730	68165206	Chr X	68132822	68136300
Chr01	68176886	68178323	Chr X	106228833	106230270
Chr01	68217306	68220572	Chr X	68190740	68194016
Chr01	68221796	68222854	Chr X	68073131	68074191
Chr01	68223544	68225824	Chr X	68077277	68079532
Chr01	68234336	68237419	Chr X	68093258	68096329
Chr01	68253527	68254895	Chr X	68114861	68116197
Chr01	68263785	68267002	Chr X	68064555	68061373
Chr01	68269901	68276856	Chr X	68059399	68052390
Chr01	68285522	68289753	Chr X	68045993	68041718
Chr01	68289970	68294219	Chr X	68041420	68037248
Chr01	68294445	68299014	Chr X	68035889	68031306
Chr01	68300431	68306968	Chr X	68027957	68021502
Chr01	68306976	68309269	Chr X	68020516	68018224
Chr01	68310754	68313190	Chr X	68016743	68014303
Chr01	68323800	68331881	Chr X	67997293	67989151
Chr01	68342434	68344938	Chr X	67981989	67979480
Chr01	68442178	68446622	Chr X	67903915	67899453
Chr01	68452126	68458116	Chr X	67891011	67885041
Chr01	68459574	68461165	Chr X	67884149	67882560
Chr01	68461870	68464127	Chr X	67882168	67879912
Chr01	68475557	68477031	Chr X	67870480	67869017
Chr01	68488974	68491438	Chr X	67858026	67855572
Chr01	68494128	68499997	Chr X	67852945	67847043
Chr01	68500893	68503098	Chr X	67846313	67844100
Chr01	68517375	68520268	Chr X	67829107	67826144
Chr01	68528167	68532511	Chr X	67810808	67806548
Chr01	68534518	68535807	Chr X	67803907	67802677
Chr01	68536451	68538019	Chr X	67802158	67800613
Chr01	68546850	68551737	Chr X	67791654	67786768
Chr01	68565090	68569690	Chr X	67763649	67759047
Chr01	68573682	68575162	Chr X	67756116	67754640
Chr01	68610053	68611998	Chr X	67745196	67743246
Chr01	68611999	68613419	Chr X	67743145	67741744
Chr01	68614234	68616528	Chr X	67739923	67737645
Chr01	68629416	68633906	Chr X	67728641	67724167
Chr01	68636585	68637601	Chr X	67720869	67719842
Chr01	68643984	68649621	Chr X	67710899	67705200
Chr01	68654065	68658775	Chr X	67701189	67696496
Chr01	68784979	68787544	Chr X	67571865	67569307
Chr01	68906073	68907858	Chr X	67449345	67447579
Chr01	69027429	69029700	Chr X	67325321	67323011
Chr01	69062984	69073046	Chr X	67289941	67279868
Chr01	69140952	69142377	Chr X	67244460	67243012
Chr01	69159648	69169481	Chr X	67210755	67200934
Chr01	69273812	69275001	Chr X	67110219	67109061
Chr01	69315957	69322837	Chr X	67066626	67059710
Chr01	69324543	69337600	Chr X	67057945	67044952
Chr01	69339524	69346434	Chr X	67044955	67038105
Chr01	69346434	69348107	Chr X	67037953	67036308
Chr01	69348461	69354136	Chr X	67035804	67030186
Chr01	69358064	69360174	Chr X	67025750	67023666
Chr01	69369422	69376184	Chr X	67016030	67009353
Chr01	69397059	69400408	Chr X	66969412	66966073
Chr01	69440190	69441609	Chr X	66926831	66925403
Chr01	69488249	69489350	Chr X	66878014	66876918
Chr01	69522450	69524328	Chr X	66840388	66838500
Chr01	69586559	69588199	Chr X	66797164	66795468
Chr01	69624203	69626542	Chr X	66759087	66756778
Chr01	69647442	69649455	Chr X	66749185	66747148
Chr01	69737839	69742928	Chr X	66629714	66624504
Chr01	69751372	69753623	Chr X	66617681	66615387
Chr01	69774159	69777833	Chr X	66594686	66590990
Chr01	69794064	69796935	Chr X	66573078	66570233
Chr01	69796950	69799776	Chr X	66570037	66567219
Chr01	69801122	69803324	Chr X	66566701	66564509
Chr01	69819759	69822968	Chr X	66549386	66546183
Chr01	69827558	69829762	Chr X	66499868	66497623
Chr01	69830092	69836285	Chr X	66497619	66491432
Chr01	69857204	69859201	Chr X	66477127	66475139
Chr01	69859121	69860410	Chr X	66475075	66473758
Chr01	69862259	69866533	Chr X	66473230	66469022
Chr01	69876105	69878758	Chr X	66453137	66450484
Chr01	69878759	69880162	Chr X	66450042	66448653
Chr01	69881682	69885600	Chr X	66447102	66443199
Chr01	69887858	69891587	Chr X	66436150	66432307
Chr01	69893370	69896847	Chr X	66430800	66427351
Chr01	69929011	69932074	Chr X	66384133	66381071
Chr01	69956784	69960159	Chr X	66347212	66343802
Chr01	69984002	69986989	Chr X	66321562	66318597
Chr01	69999455	70002386	Chr X	66309248	66306298
Chr01	70058597	70060930	Chr X	66240179	66237891
Chr01	70072269	70079665	Chr X	66227157	66219706
Chr01	70091630	70095564	Chr X	66208064	66204146
Chr01	70096325	70099077	Chr X	66203201	66200419
Chr01	70116088	70117871	Chr X	66183066	66181257
Chr01	70156701	70160075	Chr X	66135806	66132424
Chr01	70176043	70178266	Chr X	66114220	66111998
Chr01	70209792	70210828	Chr X	66080209	66079197
Chr01	70211849	70213074	Chr X	66076639	66075424
Chr01	70216585	70220006	Chr X	66072259	66068934
Chr01	70250653	70251817	Chr X	66021567	66020363
Chr01	70254168	70259903	Chr X	66017042	66011324
Chr01	70267953	70272902	Chr X	66003322	65998367
Chr01	70281599	70284962	Chr X	65990097	65986686
Chr01	70291470	70296289	Chr X	65981238	65976436
Chr01	70319286	70322265	Chr X	65920549	65917570
Chr01	70362207	70363504	Chr X	65888041	65886759
Chr01	70365825	70366952	Chr X	65881218	65880090
Chr01	70377113	70378638	Chr X	65870686	65869195
Chr01	70403407	70404872	Chr X	65851007	65849572
Chr01	70409694	70410694	Chr X	65843567	65842568
Chr01	70414543	70416886	Chr X	65839351	65837077
Chr01	70419545	70422211	Chr X	65835477	65832791
Chr01	70428649	70430584	Chr X	65824594	65822634
Chr01	70441129	70443442	Chr X	65812681	65810395
Chr01	70450249	70452237	Chr X	65805088	65803098
Chr01	70453257	70455562	Chr X	65802099	65799764
Chr01	70499000	70500139	Chr X	65732614	65731470
Chr01	70510620	70511905	Chr X	65726431	65727715
Chr01	70519510	70521876	Chr X	65724661	65722230
Chr01	70563425	70564811	Chr X	65686429	65687808
Chr01	70566012	70571100	Chr X	65677829	65672788
Chr01	70578201	70584446	Chr X	65667520	65661200
Chr01	70586296	70588616	Chr X	65659483	65657148
Chr01	70593656	70606636	Chr X	65652030	65639088
Chr01	70606674	70610066	Chr X	65638872	65635392
Chr01	70610666	70613884	Chr X	65635099	65631842
Chr01	70614253	70618506	Chr X	65631515	65627238
Chr01	70619750	70622824	Chr X	65625749	65622656
Chr01	70623094	70624656	Chr X	65621825	65620276
Chr01	70625687	70636933	Chr X	65619101	65607808
Chr01	70638924	70640183	Chr X	65603720	65602451
Chr01	70649625	70651504	Chr X	65596606	65594735
Chr01	70658623	70660393	Chr X	65588015	65586241
Chr01	70677932	70681550	Chr X	65569547	65566031
Chr01	70686172	70688301	Chr X	65561164	65559038
Chr01	70727413	70735933	Chr X	65522904	65514373
Chr01	70756348	70758725	Chr X	65492976	65490591
Chr01	70758735	70764938	Chr X	65489366	65483251
Chr01	70774964	70777507	Chr X	37898228	37895685
Chr01	70779474	70781624	Chr X	65470337	65468166
Chr01	70795153	70797618	Chr X	65453188	65450726
Chr01	70811313	70812482	Chr X	65443202	65442033
Chr01	70821510	70823860	Chr X	20624201	20626472
Chr01	70871400	70872579	Chr X	65430221	65429075
Chr01	70875991	70877995	Chr X	65418928	65416907
Chr01	70949752	70951065	Chr X	65328914	65327636
Chr01	71053578	71055069	Chr X	65190489	65189016
Chr01	71085120	71088408	Chr X	65161291	65157902
Chr01	71139763	71143792	Chr X	65115732	65111720
Chr01	71196975	71198210	Chr X	65013463	65012228
Chr01	71213977	71215804	Chr X	64996636	64994790
Chr01	71226944	71230085	Chr X	64982268	64979102
Chr01	71240684	71247554	Chr X	64967816	64960885
Chr01	71251776	71253217	Chr X	64956691	64955244
Chr01	71254315	71255960	Chr X	64953986	64952342
Chr01	71258049	71262556	Chr X	64951288	64946751
Chr01	71262772	71264769	Chr X	64946846	64944833
Chr01	71282162	71284097	Chr X	64919633	64917684
Chr01	71291581	71293336	Chr X	64912319	64910574
Chr01	71294278	71296020	Chr X	64909896	64908159
Chr01	71296834	71298510	Chr X	64907351	64905660
Chr01	71318433	71320901	Chr X	64885436	64882962
Chr01	71321284	71323169	Chr X	64882656	64880793
Chr01	71345984	71349357	Chr X	64859838	64856421
Chr01	71350633	71353805	Chr X	64855106	64851902
Chr01	71381069	71382338	Chr X	64827622	64826349
Chr01	71387466	71389707	Chr X	64819679	64817460
Chr01	71405043	71406082	Chr X	64801177	64800134
Chr01	71424258	71425454	Chr X	64787264	64786044
Chr01	71428865	71430613	Chr X	64782428	64780685
Chr01	71439684	71440778	Chr X	64773805	64772705
Chr01	71440796	71442551	Chr X	64772210	64770425
Chr01	71443151	71444956	Chr X	64769285	64767508
Chr01	71454518	71456068	Chr X	64757734	64756172
Chr01	71493171	71494228	Chr X	64739445	64738373
Chr01	71499602	71501939	Chr X	64659969	64657623
Chr01	71529726	71531531	Chr X	64704651	64702825
Chr01	71541411	71542955	Chr X	64691620	64690065
Chr01	71542955	71545114	Chr X	64688887	64686788
Chr01	71546453	71547895	Chr X	64685001	64683577
Chr01	71629008	71635183	Chr X	64550041	64543884
Chr01	71640835	71642473	Chr X	64535758	64534102
Chr01	71684025	71686744	Chr X	64475861	64473162
Chr01	71689231	71690784	Chr X	64470615	64469023
Chr01	71699952	71702647	Chr X	64459845	64457171
Chr01	71747992	71750383	Chr X	64413897	64411516
Chr01	71751275	71753083	Chr X	64410507	64408714
Chr01	71778243	71779462	Chr X	64383912	64382689
Chr01	71780092	71783307	Chr X	64382476	64379276
Chr01	71795423	71797452	Chr X	64367662	64365623
Chr01	71837676	71839971	Chr X	64320951	64318666
Chr01	71841799	71843960	Chr X	64316720	64314575
Chr01	71852056	71854526	Chr X	64306096	64303614
Chr01	71855465	71858511	Chr X	64302419	64299401
Chr01	71938252	71939816	Chr X	64222492	64220932
Chr01	71946246	71947473	Chr X	64216784	64215561
Chr01	71979407	71986954	Chr X	64193497	64185967
Chr01	72013842	72015602	Chr X	64162992	64161273
Chr01	72037979	72039671	Chr X	64140538	64138814
Chr01	72117864	72120196	Chr X	64072870	64070544
Chr01	72120324	72126152	Chr X	64070543	64064705
Chr01	72131816	72134526	Chr X	64059154	64056422
Chr01	72179542	72183030	Chr X	64012851	64009368
Chr01	72200379	72203165	Chr X	63992535	63989745
Chr01	72239090	72241429	Chr X	63954895	63952515
Chr01	72257231	72262803	Chr X	63939322	63933823
Chr01	72266937	72269109	Chr X	63929618	63927453
Chr01	72269874	72272932	Chr X	63926782	63923740
Chr01	72287935	72295067	Chr X	63908680	63901559
Chr01	72306703	72309096	Chr X	63890149	63887809
Chr01	72323950	72328958	Chr X	63879077	63874075
Chr01	72412650	72415764	Chr X	63800832	63797697
Chr01	72523804	72526804	Chr X	63683551	63680534
Chr01	72578015	72580120	Chr X	63620950	63618816
Chr01	72580496	72583608	Chr X	63618467	63615345
Chr01	72592703	72594609	Chr X	63607551	63605658
Chr01	72609342	72611726	Chr X	55237466	55239877
Chr01	72615068	72616381	Chr X	63587861	63586552
Chr01	72633956	72637021	Chr X	63569211	63566176
Chr01	72644459	72646411	Chr X	63558670	63556710
Chr01	72687776	72690258	Chr X	105293403	105290931
Chr01	72743586	72744749	Chr X	63457736	63456560
Chr01	72753600	72755383	Chr X	63447606	63445835
Chr01	72755882	72756937	Chr X	63443879	63442827
Chr01	72784329	72785797	Chr X	63411394	63409923
Chr01	72789224	72790933	Chr X	63405071	63403380
Chr01	72798219	72799913	Chr X	63396394	63394707
Chr01	72801494	72802986	Chr X	63393285	63391789
Chr01	72804386	72805613	Chr X	63389977	63388753
Chr01	72875354	72876491	Chr X	63311086	63309951
Chr01	72877773	72879297	Chr X	63309949	63308420
Chr01	72881035	72882943	Chr X	63305774	63303810
Chr01	72885965	72888337	Chr X	63302245	63299880
Chr01	72891360	72898476	Chr X	63295669	63288527
Chr01	72904403	72906258	Chr X	63282830	63280975
Chr01	72926391	72929381	Chr X	63259861	63256888
Chr01	73018091	73022203	Chr X	63165448	63161327
Chr01	73038138	73041446	Chr X	63141718	63138387
Chr01	73044677	73045992	Chr X	63135385	63134067
Chr01	73121197	73122372	Chr X	63079093	63077923
Chr01	73140278	73141662	Chr X	63052757	63051371
Chr01	73144318	73145710	Chr X	63048267	63046861
Chr01	73222344	73224186	Chr X	62980442	62978610
Chr01	73226629	73228057	Chr X	62976168	62974741
Chr01	73232761	73234003	Chr X	62970925	62969691
Chr01	73242877	73245591	Chr X	62966145	62963453
Chr01	73288083	73289563	Chr X	62922470	62921006
Chr01	73292237	73293242	Chr X	62917767	62916750
Chr01	73294577	73297599	Chr X	62915372	62912279
Chr01	73341713	73344621	Chr X	62882804	62879903
Chr01	73365608	73367443	Chr X	62859408	62857560
Chr01	73368408	73370133	Chr X	62856548	62854800
Chr01	73389650	73391496	Chr X	62841389	62839562
Chr01	73445274	73447768	Chr X	35595160	35597666
Chr01	73520432	73522265	Chr X	62697147	62695306
Chr01	73572647	73574749	Chr X	62552696	62550622
Chr01	73624531	73625747	Chr X	62483722	62482474
Chr01	73626998	73629243	Chr X	62481197	62478993
Chr01	73634032	73635042	Chr X	62474384	62473366
Chr01	73635928	73639127	Chr X	62472384	62469205
Chr01	73643662	73647212	Chr X	62465608	62462060
Chr01	73647538	73651349	Chr X	62461671	62457862
Chr01	73679881	73682306	Chr X	62432665	62430196
Chr01	73682825	73686283	Chr X	62429924	62426465
Chr01	73752515	73758430	Chr X	62360987	62355107
Chr01	73770585	73771772	Chr X	62336857	62335692
Chr01	73772224	73778845	Chr X	62334397	62327723
Chr01	73782905	73784448	Chr X	62321585	62320036
Chr01	73790024	73791336	Chr X	62314844	62313510
Chr01	73792486	73794397	Chr X	62312454	62310578
Chr01	73810147	73812406	Chr X	62278937	62276695
Chr01	73812909	73822157	Chr X	62275711	62266486
Chr01	73822888	73824617	Chr X	62264962	62263219
Chr01	73825170	73829351	Chr X	62262880	62258684
Chr01	73843548	73844910	Chr X	62243184	62241836
Chr01	73872716	73874781	Chr X	62213655	62211583
Chr01	73881239	73885075	Chr X	62199122	62195309
Chr01	73886753	73891062	Chr X	62193788	62189457
Chr01	73891198	73893215	Chr X	62189432	62187431
Chr01	73894751	73907111	Chr X	62185274	62173050
Chr01	73907111	73909337	Chr X	62172592	62170392
Chr01	73915847	73917216	Chr X	62163647	62162293
Chr01	73928400	73930043	Chr X	62150751	62149118
Chr01	73935989	73938507	Chr X	62143412	62140911
Chr01	73939021	73940928	Chr X	62140700	62138789
Chr01	73940934	73944542	Chr X	62138631	62135080
Chr01	73950140	73954390	Chr X	62131188	62126932
Chr01	73955791	73958720	Chr X	62125568	62122718
Chr01	73961836	73964105	Chr X	62119483	62117205
Chr01	74050291	74052171	Chr X	62027437	62025541
Chr01	74078302	74079567	Chr X	61998538	61997275
Chr01	74091670	74093318	Chr X	61987286	61985634
Chr01	74098319	74099632	Chr X	61981929	61980628
Chr01	74234909	74238693	Chr X	61825894	61822092
Chr01	74239349	74246344	Chr X	61821567	61814653
Chr01	74247721	74248991	Chr X	61812915	61811648
Chr01	74248990	74250680	Chr X	61811572	61809884
Chr01	74251660	74256199	Chr X	61809891	61805319
Chr01	74261570	74263870	Chr X	61804045	61801772
Chr01	74263872	74265301	Chr X	61801335	61799897
Chr01	74279876	74283062	Chr X	61782853	61779661
Chr01	74286111	74290719	Chr X	61775212	61770649
Chr01	74292434	74301586	Chr X	61769557	61760394
Chr01	74305609	74308902	Chr X	61852437	61849139
Chr01	74393211	74395341	Chr X	61691693	61689565
Chr01	74414434	74415493	Chr X	61668456	61669524
Chr01	74438368	74440202	Chr X	61654580	61652764
Chr01	74459316	74460353	Chr X	61634107	61633079
Chr01	74504578	74505923	Chr X	61589299	61587960
Chr01	74665714	74667804	Chr X	61433977	61431859
Chr01	74813248	74815739	Chr X	61284995	61282463
Chr01	74822735	74824066	Chr X	61275509	61274163
Chr01	74843685	74845450	Chr X	61255434	61253670
Chr01	74914132	74919603	Chr X	61183080	61177564
Chr01	74921356	74922561	Chr X	61176430	61175221
Chr01	74924534	74925705	Chr X	61174389	61173220
Chr01	74952031	74953863	Chr X	61145862	61144029
Chr01	74961777	74963161	Chr X	61134702	61133323
Chr01	74976169	74977603	Chr X	61124444	61123012
Chr01	75088696	75090147	Chr X	60908881	60907397
Chr01	75110677	75112621	Chr X	60883402	60881470
Chr01	75113130	75115458	Chr X	60880527	60878184
Chr01	75115650	75117812	Chr X	60877233	60875053
Chr01	75123762	75125907	Chr X	60870341	60868208
Chr01	75125795	75129525	Chr X	60867591	60863843
Chr01	75129525	75130991	Chr X	60863329	60861870
Chr01	75131937	75134105	Chr X	60861386	60859195
Chr01	75144048	75146546	Chr X	60845439	60842897
Chr01	75150031	75153060	Chr X	60837952	60834919
Chr01	75154480	75155817	Chr X	60833065	60831724
Chr01	75155843	75159308	Chr X	60831205	60827657
Chr01	75175364	75180109	Chr X	60810823	60806010
Chr01	75187791	75192976	Chr X	60800502	60795233
Chr01	75217329	75219547	Chr X	60711404	60713649
Chr01	75226653	75228894	Chr X	60718437	60720675
Chr01	75378650	75379669	Chr X	60640296	60639285
Chr01	75553789	75555657	Chr X	60036727	60038579
Chr01	75573008	75574774	Chr X	60059720	60061453
Chr01	75629268	75630685	Chr X	60115429	60116867
Chr01	75630834	75634103	Chr X	60116879	60120117
Chr01	75637815	75639499	Chr X	60125775	60127487
Chr01	75655618	75656877	Chr X	60146814	60148061
Chr01	75702957	75704753	Chr X	60193513	60195353
Chr01	75828743	75829813	Chr X	40338409	40337336
Chr01	75865871	75867703	Chr X	60276170	60274342
Chr01	75867695	75870838	Chr X	60272417	60269269
Chr01	75871475	75873025	Chr X	60269228	60267674
Chr01	75875489	75877040	Chr X	60289494	60291035
Chr01	75877016	75878413	Chr X	60291184	60292574
Chr01	75878434	75887473	Chr X	60294304	60303367
Chr01	75899249	75901122	Chr X	48607707	48605825
Chr01	75903367	75905914	Chr X	60319882	60322414
Chr01	75984954	75986488	Chr X	59884068	59882511
Chr01	75995504	75998278	Chr X	59876017	59873237
Chr01	76001869	76003114	Chr X	59868940	59867748
Chr01	76027822	76029002	Chr X	59843745	59842565
Chr01	76059217	76062154	Chr X	59813866	59810901
Chr01	76064561	76066094	Chr X	59809208	59807680
Chr01	76081518	76084210	Chr X	59793419	59790701
Chr01	76094442	76097196	Chr X	59778094	59775331
Chr01	76102457	76104363	Chr X	59767700	59765820
Chr01	76106397	76108091	Chr X	59763510	59761795
Chr01	76115176	76119036	Chr X	59755514	59751615
Chr01	76134477	76139033	Chr X	59738313	59733760
Chr01	76186018	76187481	Chr X	59562472	59563950
Chr01	76189798	76193044	Chr X	59565911	59569104
Chr01	76200090	76202694	Chr X	59577154	59579733
Chr01	76241311	76242468	Chr X	59629190	59630349
Chr01	76247433	76254811	Chr X	59636906	59644369
Chr01	76259194	76261212	Chr X	59649066	59651100
Chr01	76262971	76266021	Chr X	59652863	59655867
Chr01	76266683	76268528	Chr X	59656614	59658464
Chr01	76270421	76272207	Chr X	59660455	59662237
Chr01	76272308	76273746	Chr X	59662240	59663676
Chr01	76274745	76275957	Chr X	59666027	59667238
Chr01	76277483	76282446	Chr X	59669236	59674242
Chr01	76299468	76301070	Chr X	59694376	59695957
Chr01	76301642	76307577	Chr X	59696539	59702605
Chr01	76344506	76346757	Chr X	59505077	59502802
Chr01	76352671	76353845	Chr X	59492067	59490887
Chr01	76354737	76356097	Chr X	26779285	26780654
Chr01	76380030	76382295	Chr X	59472748	59470493
Chr01	76402839	76408497	Chr X	59448825	59443162
Chr01	76410719	76416284	Chr X	59440485	59434988
Chr01	76503961	76507284	Chr X	59350768	59347416
Chr01	76967074	76968980	Chr X	59158778	59156883
Chr01	77360852	77362056	Chr X	21753523	21752313
Chr01	77491071	77493595	Chr X	36177294	36179842
Chr01	77630629	77631911	Chr X	58889333	58888058
Chr01	77631908	77637442	Chr X	58887541	58882083
Chr01	77639335	77642300	Chr X	58879851	58876851
Chr01	77652869	77655366	Chr X	58866363	58863864
Chr01	77655487	77656703	Chr X	58863859	58862662
Chr01	77796773	77799410	Chr X	58723403	58720746
Chr01	77799439	77801249	Chr X	58720587	58718759
Chr01	77802938	77805293	Chr X	58714469	58712099
Chr01	77806101	77810911	Chr X	58711370	58706582
Chr01	77811167	77813230	Chr X	58706250	58704184
Chr01	77813932	77816448	Chr X	58702187	58699709
Chr01	77835273	77836645	Chr X	58681165	58679791
Chr01	77950453	77952375	Chr X	58563109	58561204
Chr01	77968844	77970729	Chr X	58546003	58544115
Chr01	77970727	77972699	Chr X	58543408	58541436
Chr01	78061587	78063512	Chr X	58460442	58458517
Chr01	78065115	78067159	Chr X	58455654	58453632
Chr01	78148765	78151137	Chr X	58046510	58048890
Chr01	78199167	78200421	Chr X	91642210	91643443
Chr01	78266649	78269325	Chr X	58141290	58143978
Chr01	78357531	78361935	Chr X	58332242	58336620
Chr01	78441246	78445779	Chr X	57946776	57942214
Chr01	78456222	78457974	Chr X	57934687	57932935
Chr01	78481288	78483045	Chr X	57908092	57906346
Chr01	78496830	78500116	Chr X	57896758	57893439
Chr01	78502227	78505611	Chr X	57881800	57878429
Chr01	78526982	78529918	Chr X	57852776	57849878
Chr01	78532066	78534159	Chr X	57847341	57845248
Chr01	78582659	78584067	Chr X	57788683	57787272
Chr01	78629864	78632474	Chr X	57765937	57763292
Chr01	78634274	78635687	Chr X	57761326	57759898
Chr01	78637602	78640817	Chr X	57757969	57754724
Chr01	78641677	78651631	Chr X	57753739	57743767
Chr01	78652189	78658045	Chr X	57743389	57737499
Chr01	78665616	78668736	Chr X	57729393	57726241
Chr01	78732142	78733381	Chr X	57659524	57658294
Chr01	78786347	78787564	Chr X	57573611	57572408
Chr01	79040176	79044306	Chr X	57308553	57304410
Chr01	79086213	79089517	Chr X	57262639	57259324
Chr01	79091987	79092995	Chr X	57258211	57257181
Chr01	79093410	79095310	Chr X	57256349	57254463
Chr01	79099030	79100369	Chr X	57248433	57247091
Chr01	79100385	79102948	Chr X	57246910	57244347
Chr01	79119175	79120179	Chr X	57216364	57215359
Chr01	79122057	79125511	Chr X	57213297	57209805
Chr01	79173323	79174676	Chr X	57156705	57155372
Chr01	79225840	79227985	Chr X	57099900	57097744
Chr01	79317037	79319499	Chr X	57050061	57047584
Chr01	79336399	79338979	Chr X	57027674	57025060
Chr01	79428021	79429129	Chr X	56923439	56922329
Chr01	79433501	79435169	Chr X	56918294	56916602
Chr01	79474192	79478894	Chr X	56874362	56869650
Chr01	79491837	79493458	Chr X	56858298	56856696
Chr01	79497142	79498782	Chr X	56852986	56851380
Chr01	79501984	79503469	Chr X	56848405	56846946
Chr01	79522980	79524589	Chr X	56828119	56826506
Chr01	79558220	79560547	Chr X	56757428	56759711
Chr01	79565692	79567459	Chr X	56766200	56767967
Chr01	79599711	79606564	Chr X	56737644	56730802
Chr01	79606786	79609058	Chr X	56730587	56728331
Chr01	79609278	79616391	Chr X	56728315	56721231
Chr01	79625692	79635198	Chr X	56710995	56701410
Chr01	79639024	79643016	Chr X	56697653	56693605
Chr01	79661845	79665731	Chr X	56652263	56648318
Chr01	79680236	79689938	Chr X	56632683	56622873
Chr01	79719561	79720725	Chr X	56592909	56591743
Chr01	79729617	79732024	Chr X	56576980	56574594
Chr01	79789314	79791950	Chr X	56520933	56518272
Chr01	79798493	79800770	Chr X	56510936	56508628
Chr01	79814555	79817493	Chr X	56492720	56489717
Chr01	79823423	79828867	Chr X	56484304	56478889
Chr01	79843579	79845333	Chr X	56461782	56460012
Chr01	79859746	79862444	Chr X	56449419	56446635
Chr01	79867840	79872225	Chr X	56440104	56435719
Chr01	79872718	79877191	Chr X	56434915	56430449
Chr01	79877819	79880574	Chr X	56428765	56426045
Chr01	79882965	79885538	Chr X	56422551	56420015
Chr01	79889352	79892468	Chr X	56417024	56413875
Chr01	79914690	79917923	Chr X	56404761	56401546
Chr01	79919988	79921214	Chr X	56397555	56396321
Chr01	79925366	79927411	Chr X	56384326	56382300
Chr01	79985332	79990689	Chr X	56325363	56319955
Chr01	80003820	80007113	Chr X	56309948	56306672
Chr01	80010224	80011479	Chr X	56305616	56304358
Chr01	80014844	80017484	Chr X	56300671	56298062
Chr01	80029128	80030219	Chr X	56290679	56289581
Chr01	80044838	80047414	Chr X	56261503	56258961
Chr01	80048525	80051079	Chr X	56256341	56253816
Chr01	80051083	80055771	Chr X	56253554	56248867
Chr01	80098999	80101772	Chr X	56208118	56210891
Chr01	80123613	80127300	Chr X	56185772	56182128
Chr01	80128302	80131242	Chr X	56182118	56179189
Chr01	80295789	80298074	Chr X	56064834	56067092
Chr01	80335653	80339984	Chr X	56104958	56109305
Chr01	80343729	80349531	Chr X	56109360	56115183
Chr01	80353273	80354892	Chr X	21736774	21735144
Chr01	80355142	80356690	Chr X	56115966	56117515
Chr01	80356817	80360486	Chr X	56117538	56121216
Chr01	80371759	80374386	Chr X	56129023	56131665
Chr01	80385947	80392643	Chr X	56140116	56146820
Chr01	80411092	80413045	Chr X	55824922	55822973
Chr01	80432534	80433877	Chr X	55794058	55792717
Chr01	80444131	80445202	Chr X	55784371	55783300
Chr01	80455888	80457677	Chr X	55770173	55768382
Chr01	80462941	80464919	Chr X	55766134	55764175
Chr01	80503028	80504209	Chr X	55711237	55712421
Chr01	80532342	80533451	Chr X	55741885	55743000
Chr01	80542286	80543349	Chr X	55700503	55699419
Chr01	80559800	80561661	Chr X	55682864	55681040
Chr01	80565921	80567473	Chr X	55674740	55673152
Chr01	80624771	80626291	Chr X	55614129	55612603
Chr01	80715469	80717795	Chr X	55537843	55535536
Chr01	80730099	80731475	Chr X	55527152	55525763
Chr01	80752512	80754907	Chr X	55504306	55501946
Chr01	80779180	80782207	Chr X	55473683	55470673
Chr01	80782821	80783898	Chr X	55469037	55467953
Chr01	80784444	80786057	Chr X	55467471	55465832
Chr01	80808851	80810254	Chr X	55449885	55448471
Chr01	80813146	80815392	Chr X	55447380	55445138
Chr01	80819288	80820651	Chr X	55442314	55440924
Chr01	80843117	80845342	Chr X	55418376	55416119
Chr01	80864018	80865377	Chr X	55401788	55400418
Chr01	80883289	80886701	Chr X	55384382	55380953
Chr01	80904624	80906179	Chr X	55359581	55357980
Chr01	80936784	80940263	Chr X	55332231	55328736
Chr01	80941561	80942740	Chr X	55328738	55327568
Chr01	80950421	80953416	Chr X	55322066	55319056
Chr01	81024595	81026009	Chr X	38637765	38639197
Chr01	81030377	81032766	Chr X	55182608	55180220
Chr01	81052773	81054506	Chr X	55152116	55150355
Chr01	81064063	81065162	Chr X	55135974	55134872
Chr01	81092466	81095792	Chr X	55110181	55106818
Chr01	81112498	81116892	Chr X	55075711	55071287
Chr01	81163332	81164901	Chr X	55021871	55020307
Chr01	81184676	81186267	Chr X	55001194	54999599
Chr01	81201404	81202750	Chr X	54987493	54986137
Chr01	81261993	81264332	Chr X	54892277	54889928
Chr01	81302390	81304066	Chr X	54851903	54850227
Chr01	81326042	81327144	Chr X	54832466	54831360
Chr01	81396179	81397882	Chr X	54761630	54759967
Chr01	81444791	81447026	Chr X	54713557	54711279
Chr01	81514397	81515599	Chr X	54631911	54630690
Chr01	81540728	81541947	Chr X	54607406	54606182
Chr01	81610874	81611984	Chr X	54542727	54541618
Chr01	81770359	81772253	Chr X	54384765	54386674
Chr01	81775141	81777446	Chr X	54388535	54390890
Chr01	81797868	81800613	Chr X	54359583	54362334
Chr01	81844318	81846425	Chr X	54328723	54326599
Chr01	81853022	81855303	Chr X	54319328	54317038
Chr01	81860774	81862600	Chr X	54310855	54309028
Chr01	81893611	81894874	Chr X	54283234	54281954
Chr01	81901537	81906373	Chr X	54274411	54269598
Chr01	81907894	81909874	Chr X	54266912	54264924
Chr01	81917518	81918534	Chr X	54221746	54222779
Chr01	81920962	81922586	Chr X	54224817	54226438
Chr01	81930199	81932587	Chr X	54203698	54201290
Chr01	82038782	82041040	Chr X	54073614	54071323
Chr01	82043857	82048548	Chr X	54068067	54063398
Chr01	82092549	82094820	Chr X	53994769	53992493
Chr01	82106176	82110087	Chr X	53982598	53978675
Chr01	82196469	82198374	Chr X	53883543	53881640
Chr01	82213960	82215534	Chr X	53862301	53860746
Chr01	82232319	82234104	Chr X	53841807	53840023
Chr01	82312418	82314010	Chr X	53762492	53760900
Chr01	82327565	82329872	Chr X	53748059	53745774
Chr01	82332907	82334718	Chr X	53743259	53741444
Chr01	82390001	82391644	Chr X	53687305	53685645
Chr01	82408735	82411928	Chr X	53666847	53663647
Chr01	82647799	82649126	Chr X	53400565	53399243
Chr01	82799693	82801719	Chr X	53226955	53224943
Chr01	82863614	82868338	Chr X	53157275	53152519
Chr01	82916297	82919328	Chr X	53079128	53076123
Chr01	82943998	82946050	Chr X	53051741	53049684
Chr01	82949111	82954546	Chr X	53047035	53041603
Chr01	83123073	83128877	Chr X	52969616	52975464
Chr01	83159877	83161531	Chr X	52906854	52905197
Chr01	83198605	83200056	Chr X	52867347	52865888
Chr01	83209118	83214754	Chr X	52855859	52850245
Chr01	83226795	83229139	Chr X	52842771	52840441
Chr01	83237957	83239331	Chr X	52828973	52827628
Chr01	83242808	83246366	Chr X	52823953	52820350
Chr01	83256209	83257775	Chr X	52814692	52813089
Chr01	83275401	83277017	Chr X	52762870	52761248
Chr01	83307371	83309680	Chr X	52729495	52727189
Chr01	83317459	83318574	Chr X	52720388	52719268
Chr01	83321032	83322573	Chr X	52716388	52714857
Chr01	83489123	83491086	Chr X	98376315	98378282
Chr01	83489825	83493206	Chr X	110633918	110630539
Chr01	83534124	83536083	Chr X	114557082	114559081
Chr01	83542582	83545155	Chr X	98550893	98553446
Chr01	83562812	83564285	Chr X	39212113	39213606
Chr01	83562949	83565560	Chr X	26707857	26710447
Chr01	83645529	83647309	Chr X	41305960	41307755
Chr01	83705262	83706547	Chr X	52568621	52567337
Chr01	83782902	83784164	Chr X	45920226	45918967
Chr01	83811885	83813433	Chr X	44005265	44006785
Chr01	83929983	83933045	Chr X	105671134	105667991
Chr01	83934070	83935657	Chr X	26465766	26467343
Chr01	83938185	83939239	Chr X	35395575	35396639
Chr01	83942168	83943250	Chr X	52217239	52218331
Chr01	83961190	83965487	Chr X	52165985	52170289
Chr01	84000502	84002787	Chr X	36006262	36003983
Chr01	84039311	84040461	Chr X	51927007	51925844
Chr01	84046149	84049511	Chr X	51920350	51916983
Chr01	84052445	84054328	Chr X	51915216	51913321
Chr01	84058277	84059548	Chr X	51910561	51909306
Chr01	84069525	84070974	Chr X	62770514	62769065
Chr01	84080855	84083819	Chr X	51885834	51882817
Chr01	84102945	84106197	Chr X	51863204	51859965
Chr01	84117694	84120187	Chr X	51849257	51846803
Chr01	84132686	84134236	Chr X	51832649	51831082
Chr01	84151659	84155958	Chr X	51812943	51808623
Chr01	84167759	84168903	Chr X	51799860	51798690
Chr01	84186838	84189087	Chr X	51781705	51779444
Chr01	84190971	84196612	Chr X	51777546	51771896
Chr01	84222370	84223808	Chr X	51746975	51745511
Chr01	84292661	84293847	Chr X	51674363	51673184
Chr01	84320260	84321283	Chr X	51647407	51646381
Chr01	84347054	84348498	Chr X	51621352	51619896
Chr01	84358924	84360887	Chr X	51608921	51606932
Chr01	84367488	84373696	Chr X	51600615	51594402
Chr01	84428352	84431016	Chr X	48896625	48893961
Chr01	84447756	84449058	Chr X	51522914	51521599
Chr01	84483005	84484082	Chr X	51485453	51484351
Chr01	84493355	84494629	Chr X	51475283	51474023
Chr01	84507052	84508594	Chr X	51463213	51461635
Chr01	84560522	84562655	Chr X	51407420	51405291
Chr01	84573075	84577058	Chr X	51394549	51390571
Chr01	84647120	84650631	Chr X	51274191	51270672
Chr01	84652327	84654006	Chr X	51267758	51266106
Chr01	84684129	84688146	Chr X	51236245	51232210
Chr01	84700839	84702367	Chr X	51208172	51206636
Chr01	84737696	84740073	Chr X	51160931	51158571
Chr01	84808122	84810182	Chr X	51087426	51085386
Chr01	84815638	84816807	Chr X	51080939	51079773
Chr01	84839620	84841533	Chr X	51037869	51035960
Chr01	84930742	84932068	Chr X	50935774	50934419
Chr01	84939686	84941836	Chr X	50926201	50924037
Chr01	84942465	84943772	Chr X	50923338	50922037
Chr01	85031310	85032976	Chr X	50818335	50816676
Chr01	85055277	85056750	Chr X	50747625	50749083
Chr01	85108348	85109892	Chr X	50725757	50727304
Chr01	85165934	85169985	Chr X	50657332	50653282
Chr01	85182462	85183708	Chr X	50644291	50643010
Chr01	85200552	85202964	Chr X	50623155	50620765
Chr01	85225458	85227765	Chr X	50608513	50606199
Chr01	85229408	85238791	Chr X	50604753	50595342
Chr01	85314286	85315720	Chr X	50520962	50519509
Chr01	85328072	85330134	Chr X	50506723	50504697
Chr01	85336079	85338185	Chr X	50498687	50496550
Chr01	85415093	85417322	Chr X	50417907	50415705
Chr01	85419457	85421377	Chr X	50412730	50410821
Chr01	85450776	85452030	Chr X	50381737	50380484
Chr01	85472803	85476064	Chr X	50360411	50357120
Chr01	85505647	85507568	Chr X	50330388	50328451
Chr01	85523205	85527905	Chr X	50313267	50308625
Chr01	85531790	85533375	Chr X	50304843	50303275
Chr01	85534233	85535972	Chr X	50301802	50300034
Chr01	85538664	85543116	Chr X	50297610	50293159
Chr01	85581833	85583240	Chr X	50255466	50254078
Chr01	85583443	85585056	Chr X	50254071	50252468
Chr01	85608336	85609418	Chr X	50229719	50228659
Chr01	85620819	85628773	Chr X	50217476	50209492
Chr01	85642248	85643320	Chr X	50196812	50195779
Chr01	85643475	85645353	Chr X	50195778	50193864
Chr01	85691956	85695390	Chr X	50145560	50142093
Chr01	85718159	85722770	Chr X	50117812	50113128
Chr01	85723944	85726618	Chr X	50112401	50109735
Chr01	85733077	85736202	Chr X	50102396	50099270
Chr01	85810862	85811864	Chr X	50009699	50008696
Chr01	85815259	85817424	Chr X	50005227	50002977
Chr01	85837327	85843102	Chr X	49985781	49980024
Chr01	85843926	85846142	Chr X	49979235	49976974
Chr01	85872367	85873975	Chr X	49944764	49943169
Chr01	85956932	85959306	Chr X	52157865	52155473
Chr01	86034350	86035388	Chr X	20639889	20638844
Chr01	86064491	86065788	Chr X	111598472	111597167
Chr01	86087855	86091193	Chr X	16938514	16941740
Chr01	86180644	86183419	Chr X	28290877	28293661
Chr01	86200055	86202009	Chr X	35791250	35789277
Chr01	86275280	86276540	Chr X	49369863	49368655
Chr01	86280358	86286279	Chr X	49365750	49359906
Chr01	86288498	86289742	Chr X	49358054	49356805
Chr01	86309397	86314856	Chr X	49336727	49331214
Chr01	86340716	86341768	Chr X	49304347	49303289
Chr01	86346353	86348582	Chr X	49299713	49297509
Chr01	86379161	86381104	Chr X	49265247	49263303
Chr01	86398836	86406334	Chr X	49246095	49238671
Chr01	86406637	86410813	Chr X	49238503	49234268
Chr01	86412363	86414441	Chr X	49232045	49229963
Chr01	86428660	86430561	Chr X	49215767	49213926
Chr01	86431409	86433429	Chr X	49213070	49211074
Chr01	86612505	86613667	Chr X	22089779	22088610
Chr01	86622662	86624217	Chr X	98485946	98484351
Chr01	86647666	86649324	Chr X	46075706	46074049
Chr01	86654791	86656352	Chr X	44308585	44310149
Chr01	86660890	86663260	Chr X	52069835	52072191
Chr01	86740743	86743224	Chr X	48915070	48917530
Chr01	86741905	86743224	Chr X	39493732	39492410
Chr01	86779839	86781188	Chr X	20405749	20407090
Chr01	86797043	86799116	Chr X	52556440	52554363
Chr01	86880411	86882264	Chr X	48147882	48146041
Chr01	86901641	86903583	Chr X	45823889	45821925
Chr01	86906650	86910176	Chr X	40106530	40110046
Chr01	86962684	86963866	Chr X	123858259	123859462
Chr01	86982805	86984360	Chr X	98201067	98199509
Chr01	87004510	87005526	Chr X	104202620	104201591
Chr01	87030798	87034114	Chr X	96946715	96943412
Chr01	87034116	87035730	Chr X	96943288	96941671
Chr01	87049399	87051070	Chr X	37307034	37308716
Chr01	87051207	87052294	Chr X	37308716	37309790
Chr01	87126891	87129811	Chr X	48072454	48069583
Chr01	87135626	87140057	Chr X	48063122	48058657
Chr01	87144738	87147051	Chr X	48053133	48050793
Chr01	87158599	87164308	Chr X	48040262	48034609
Chr01	87164607	87166613	Chr X	48034614	48032588
Chr01	87200131	87201348	Chr X	47994997	47993771
Chr01	87238436	87240859	Chr X	47953158	47950716
Chr01	87245054	87246341	Chr X	47946535	47945245
Chr01	87247210	87249923	Chr X	47943940	47941223
Chr01	87251396	87254996	Chr X	47940428	47936822
Chr01	87261327	87263901	Chr X	47931166	47928562
Chr01	87265036	87267343	Chr X	47927895	47925568
Chr01	87269068	87270615	Chr X	47924397	47922879
Chr01	87294698	87295982	Chr X	47900497	47899198
Chr01	87296898	87300085	Chr X	47899147	47895953
Chr01	87304397	87306803	Chr X	47892664	47890229
Chr01	87307002	87311788	Chr X	47890009	47885217
Chr01	87312682	87314396	Chr X	47884048	47882332
Chr01	87320967	87324729	Chr X	47871176	47867386
Chr01	87327892	87330814	Chr X	47863905	47861022
Chr01	87336834	87338716	Chr X	47855608	47853742
Chr01	87343643	87345579	Chr X	47852004	47850124
Chr01	87377666	87379925	Chr X	47784537	47782265
Chr01	87379927	87381188	Chr X	47782185	47780949
Chr01	87394017	87396483	Chr X	47761934	47759435
Chr01	87397713	87399343	Chr X	47759313	47757682
Chr01	87399340	87400928	Chr X	47755922	47754344
Chr01	87420666	87422659	Chr X	47738459	47736456
Chr01	87437190	87439224	Chr X	47718066	47715989
Chr01	87442572	87446878	Chr X	47713644	47709255
Chr01	87449961	87452073	Chr X	47706596	47704474
Chr01	87459733	87460853	Chr X	20068411	20067274
Chr01	87467396	87472014	Chr X	47680133	47675531
Chr01	87480065	87481192	Chr X	47666748	47665629
Chr01	87483556	87485181	Chr X	47663665	47662038
Chr01	87542343	87544937	Chr X	47556608	47559236
Chr01	87579347	87580539	Chr X	47587285	47586084
Chr01	87580725	87582411	Chr X	47585750	47584049
Chr01	87590754	87593786	Chr X	47577818	47574780
Chr01	87759510	87760556	Chr X	91705912	91704857
Chr01	88523655	88525304	Chr X	36363777	36362125
Chr01	88684058	88685571	Chr X	52540742	52539227
Chr01	88748820	88751751	Chr X	99903384	99906375
Chr01	88820548	88821794	Chr X	46208294	46209513
Chr01	88877691	88879414	Chr X	46118147	46116431
Chr01	88884863	88886770	Chr X	107267389	107265462
Chr01	88948522	88949673	Chr X	44283677	44284826
Chr01	88999495	89000774	Chr X	47533050	47531763
Chr01	89013670	89016953	Chr X	47521634	47518317
Chr01	89028368	89032166	Chr X	47508442	47504631
Chr01	89034414	89035830	Chr X	47501948	47500499
Chr01	89054139	89055231	Chr X	47465185	47464080
Chr01	89098953	89100919	Chr X	47408634	47406677
Chr01	89105924	89107371	Chr X	47402063	47400613
Chr01	89108444	89109892	Chr X	47398893	47397435
Chr01	89110456	89112039	Chr X	47393766	47392125
Chr01	89114570	89116251	Chr X	47388279	47386585
Chr01	89116819	89122343	Chr X	47386591	47380916
Chr01	89122347	89124645	Chr X	47380810	47378507
Chr01	89124998	89128285	Chr X	47378504	47375198
Chr01	89129472	89132417	Chr X	47375201	47372221
Chr01	89136844	89139386	Chr X	47367635	47365067
Chr01	89158513	89162039	Chr X	47324338	47320795
Chr01	89172075	89174429	Chr X	47311747	47309319
Chr01	89177083	89178166	Chr X	47307288	47306210
Chr01	89181837	89185082	Chr X	47298851	47295589
Chr01	89220844	89222211	Chr X	47254294	47255694
Chr01	89240603	89242488	Chr X	47220665	47218800
Chr01	89262212	89264500	Chr X	27348524	27350796
Chr01	89280833	89283688	Chr X	22189697	22186835
Chr01	89299542	89305298	Chr X	47163862	47158065
Chr01	89310483	89311743	Chr X	47152905	47151634
Chr01	89314913	89316671	Chr X	47148903	47147146
Chr01	89328800	89330204	Chr X	47136504	47135095
Chr01	89336046	89337110	Chr X	47130725	47129626
Chr01	89343587	89351858	Chr X	47123091	47114780
Chr01	89353846	89355825	Chr X	47112896	47110955
Chr01	89387976	89389550	Chr X	47074702	47073117
Chr01	89392035	89394489	Chr X	47070228	47067765
Chr01	89396043	89397591	Chr X	47066825	47065290
Chr01	89506128	89507344	Chr X	19840076	19838883
Chr01	89515264	89517683	Chr X	46774521	46772093
Chr01	89584087	89585811	Chr X	46668999	46667268
Chr01	89673617	89675435	Chr X	43829327	43831163
Chr01	89678481	89680131	Chr X	20619572	20621206
Chr01	89748907	89753123	Chr X	69635687	69639925
Chr01	89812306	89815958	Chr X	72358512	72362132
Chr01	89915828	89918028	Chr X	47042723	47040561
Chr01	89919377	89923460	Chr X	47038933	47034897
Chr01	89926787	89931004	Chr X	47032292	47028077
Chr01	89944211	89947291	Chr X	47007962	47004832
Chr01	89952436	89955120	Chr X	47000900	46998275
Chr01	89955514	89958823	Chr X	46997549	46994287
Chr01	89973145	89974403	Chr X	46943556	46944794
Chr01	89985480	89988081	Chr X	46953264	46955844
Chr01	90011697	90013774	Chr X	46837948	46840060
Chr01	90039964	90042040	Chr X	46861487	46863631
Chr01	90046362	90047615	Chr X	46867932	46869195
Chr01	90050420	90051947	Chr X	46871647	46873184
Chr01	90514797	90516840	Chr X	36407444	36409488
Chr01	90697634	90699549	Chr X	117128291	117126373
Chr01	90726217	90729174	Chr X	22911746	22914684
Chr01	90840389	90841870	Chr X	40666044	40664573
Chr01	90843058	90845470	Chr X	40663514	40661102
Chr01	90900699	90903220	Chr X	4691243	4688705
Chr01	91095046	91097419	Chr X	39950130	39947758
Chr01	91113180	91115080	Chr X	132489340	132491220
Chr01	91533984	91535095	Chr X	48932027	48930914
Chr01	91535035	91537149	Chr X	48930926	48928805
Chr01	91581118	91582698	Chr X	26943315	26941739
Chr01	91607030	91608496	Chr X	17426751	17428244
Chr01	91768412	91770020	Chr X	26878935	26877314
Chr01	91870261	91871812	Chr X	46305118	46306658
Chr01	91891056	91892659	Chr X	46581762	46583333
Chr01	91936406	91959708	Chr X	46535220	46511834
Chr01	91963244	91967335	Chr X	46503376	46499271
Chr01	91989278	91990864	Chr X	46468367	46466749
Chr01	92246378	92248366	Chr X	48765153	48763175
Chr01	92255098	92257005	Chr X	62765279	62767206
Chr01	92280061	92282291	Chr X	67665409	67667658
Chr01	92376234	92377816	Chr X	112125531	112123947
Chr01	92398958	92401192	Chr X	40782987	40785272
Chr01	92440384	92443474	Chr X	50164171	50167284
Chr01	92477733	92479316	Chr X	42584214	42585789
Chr01	92498004	92500731	Chr X	14666926	14664209
Chr01	92503430	92508297	Chr X	42639779	42644607
Chr01	92548513	92551031	Chr X	43217757	43220315
Chr01	92585746	92586886	Chr X	43262649	43263826
Chr01	92605290	92609117	Chr X	43305631	43301842
Chr01	92634669	92635792	Chr X	120709148	120708017
Chr01	92774514	92776849	Chr X	36100967	36103293
Chr01	92778054	92779918	Chr X	36104092	36105976
Chr01	92807336	92808949	Chr X	2663201	2664830
Chr01	93046944	93049831	Chr X	43144952	43142105
Chr01	93102657	93104835	Chr X	43055393	43053263
Chr01	93110132	93111892	Chr X	103169497	103167723
Chr01	93118888	93120669	Chr X	43047062	43045284
Chr01	93122809	93124360	Chr X	43045287	43043769
Chr01	93175240	93177382	Chr X	42983498	42981339
Chr01	93185965	93192522	Chr X	42972187	42965606
Chr01	93212390	93214832	Chr X	42941803	42939361
Chr01	93216971	93220447	Chr X	42937407	42933942
Chr01	93327036	93328929	Chr X	42849611	42847709
Chr01	93333359	93338956	Chr X	42842221	42836551
Chr01	93352441	93354732	Chr X	42819752	42817472
Chr01	93407045	93410182	Chr X	42754468	42751336
Chr01	93420604	93422134	Chr X	42740952	42739439
Chr01	93422284	93424760	Chr X	42739435	42736951
Chr01	93560327	93561459	Chr X	40518435	40517305
Chr01	93560697	93562855	Chr X	41350525	41352671
Chr01	93656596	93658159	Chr X	23858190	23859735
Chr01	93749459	93750982	Chr X	107836341	107837881
Chr01	93751166	93752347	Chr X	27376068	27377243
Chr01	93753418	93755321	Chr X	2077305	2079206
Chr01	93767764	93770089	Chr X	39385820	39388150
Chr01	93774619	93775749	Chr X	39388908	39390032
Chr01	93912575	93915339	Chr X	40639287	40636523
Chr01	94190788	94192069	Chr X	43948341	43947067
Chr01	94196682	94199362	Chr X	48745509	48742816
Chr01	94334906	94335942	Chr X	19100258	19099215
Chr01	94375989	94385068	Chr X	44398440	44407503
Chr01	94386026	94388516	Chr X	44407569	44410144
Chr01	94388528	94389701	Chr X	44413726	44414902
Chr01	94390551	94393709	Chr X	44416206	44419409
Chr01	94395597	94397146	Chr X	44419718	44421279
Chr01	94452801	94459424	Chr X	44481694	44488230
Chr01	94491278	94492883	Chr X	44518714	44520325
Chr01	94886887	94892552	Chr X	44978001	44983669
Chr01	94898141	94903226	Chr X	44988825	44993914
Chr01	94903356	94906801	Chr X	44993914	44997396
Chr01	94910722	94917896	Chr X	45001227	45008422
Chr01	94964291	94965549	Chr X	45077378	45078665
Chr01	94968577	94969746	Chr X	45081540	45082712
Chr01	95009446	95011235	Chr X	45130834	45132593
Chr01	95011353	95014055	Chr X	45132687	45135354
Chr01	95016222	95024320	Chr X	45140151	45148360
Chr01	95072835	95076824	Chr X	42527813	42523746
Chr01	95090367	95092671	Chr X	42498370	42496032
Chr01	95107808	95111490	Chr X	42488213	42484597
Chr01	95119357	95121199	Chr X	42472193	42470350
Chr01	95121656	95125881	Chr X	42469138	42464904
Chr01	95127454	95128728	Chr X	42462412	42461146
Chr01	95131399	95135675	Chr X	42458426	42454077
Chr01	95144097	95145475	Chr X	42444898	42443545
Chr01	95156878	95158222	Chr X	42431179	42429836
Chr01	95174374	95177129	Chr X	42408840	42406123
Chr01	95180855	95183194	Chr X	42403009	42400639
Chr01	95184838	95186212	Chr X	42398408	42397021
Chr01	95186531	95189269	Chr X	42396998	42394235
Chr01	95191655	95200654	Chr X	42394242	42385290
Chr01	95323183	95324533	Chr X	42248205	42246875
Chr01	95414532	95419517	Chr X	42125494	42120517
Chr01	95422906	95424535	Chr X	42118714	42117053
Chr01	95428905	95430089	Chr X	42113099	42111938
Chr01	95465737	95468822	Chr X	42061533	42058414
Chr01	95538312	95545161	Chr X	41971605	41964613
Chr01	95576158	95577697	Chr X	41932045	41930517
Chr01	95581382	95582871	Chr X	41926267	41924784
Chr01	95629309	95630966	Chr X	41882807	41881154
Chr01	95631274	95632936	Chr X	41881158	41879503
Chr01	95635388	95638111	Chr X	41876932	41874203
Chr01	95653051	95654795	Chr X	41842111	41840348
Chr01	95654850	95658838	Chr X	41839835	41835847
Chr01	95678626	95680411	Chr X	41819608	41817812
Chr01	95682458	95684389	Chr X	41817730	41815794
Chr01	95687439	95688453	Chr X	41813628	41812622
Chr01	95688689	95690977	Chr X	41812576	41810296
Chr01	95691113	95694542	Chr X	41810263	41806812
Chr01	95699155	95701804	Chr X	41798125	41795459
Chr01	95702010	95704210	Chr X	41794995	41792776
Chr01	95708739	95710445	Chr X	41786960	41785256
Chr01	95792883	95794515	Chr X	41674466	41676097
Chr01	95794519	95796074	Chr X	41676666	41678232
Chr01	95865074	95867991	Chr X	41748392	41751337
Chr01	95868777	95871628	Chr X	41751817	41754628
Chr01	95993656	95996125	Chr X	81273728	81276203
Chr01	96006951	96008972	Chr X	21603944	21605964
Chr01	96137859	96139391	Chr X	24062886	24064415
Chr01	96159631	96160711	Chr X	44130007	44128918
Chr01	96331589	96332639	Chr X	36394246	36393215
Chr01	96337146	96338196	Chr X	36393215	36394246
Chr01	96419985	96421784	Chr X	2506090	2504268
Chr01	96424732	96427514	Chr X	24089123	24086313
Chr01	96427521	96429887	Chr X	2504273	2501888
Chr01	96456787	96458908	Chr X	52059687	52057543
Chr01	96529757	96532384	Chr X	126709142	126706491
Chr01	97555336	97557975	Chr X	126342751	126345393
Chr01	97735689	97738054	Chr X	38755354	38752959
Chr01	97750356	97759066	Chr X	38741190	38732444
Chr01	97762795	97764728	Chr X	38728508	38726555
Chr01	97768007	97771507	Chr X	38723417	38719901
Chr01	97774731	97776077	Chr X	38717085	38715764
Chr01	97778773	97781158	Chr X	38712382	38710051
Chr01	97781340	97783402	Chr X	129545856	129543801
Chr01	97789475	97791636	Chr X	26920949	26918790
Chr01	97893106	97894898	Chr X	48431748	48433533
Chr01	97994447	97999809	Chr X	38461270	38455873
Chr01	98013693	98015581	Chr X	38446317	38444448
[truncated: 16,918 more rows]
