# Supplementary material for: A-to-I RNA editing of CYP18A1 mediates transgenerational wing dimorphism in aphids
Source: eLife. 2025 Apr 3;13:RP96540. doi: 10.7554/eLife.96540 (PMC11968105; doi:10.7554/eLife.96540)
Supplement: Supplementary file 5. [file elife-96540-supp5.xlsx]

## Sheet: Sheet1
Chromosome	Editing Position	Editing Type	Related Gene ID	Related Gene Annotation
Chr01	907011	intergenic_region	Chr01.g00016-Chr01.g00017	XP_022168064.1 uncharacterized protein LOC111032143 [Myzus persicae]
Chr01	4857378	missense_variant	Chr01.g00076	KAF0691166.1 Uncharacterized protein FWK35_00038962 [Aphis craccivora]
Chr01	4857566	synonymous_variant	Chr01.g00076	KAF0691166.1 Uncharacterized protein FWK35_00038962 [Aphis craccivora]
Chr01	6879288	missense_variant	Chr01.g00147	XP_016661254.1 F-box/SPRY domain-containing protein 1-like [Acyrthosiphon pisum]
Chr01	10438110	intergenic_region	Chr01.g00216-Chr01.g00217	XP_003247108.1 mpv17-like protein 2 [Acyrthosiphon pisum]
Chr01	10460132	intron_variant	Chr01.g00217	XP_001944737.2 26S proteasome regulatory subunit 4 [Acyrthosiphon pisum]
Chr01	11611077	missense_variant	Chr01.g00239	KAF0739254.1 C2H2-type domain-containing protein, partial [Aphis craccivora]
Chr01	12297737	missense_variant	Chr01.g00257	XP_001946195.2 uncharacterized protein LOC100168507 [Acyrthosiphon pisum]
Chr01	13436555	intergenic_region	Chr01.g00291-Chr01.g00292	XP_008181178.1 uncharacterized protein LOC103308839 [Acyrthosiphon pisum]
Chr01	15968317	intron_variant	Chr01.g00380	XP_029348651.1 DNA (cytosine-5)-methyltransferase 3-like [Acyrthosiphon pisum]
Chr01	16003681	splice_acceptor_variant&intron_variant	Chr01.g00382	KAF0720933.1 RING-type domain-containing protein, partial [Aphis craccivora]
Chr01	16424988	intergenic_region	Chr01.g00396-Chr01.g00397	XP_022181596.1 actin-like [Myzus persicae]
Chr01	17022341	3_prime_UTR_variant	Chr01.g00420	XP_001949672.2 mothers against decapentaplegic homolog 4 [Acyrthosiphon pisum]
Chr01	17073619	synonymous_variant	Chr01.g00422	XP_022183233.1 uncharacterized protein LOC111042839 [Myzus persicae]
Chr01	17501870	intergenic_region	Chr01.g00432-Chr01.g00433	KAF0726514.1 Uncharacterized protein FWK35_00028530 [Aphis craccivora]
Chr01	17502002	intergenic_region	Chr01.g00432-Chr01.g00433	KAF0726514.1 Uncharacterized protein FWK35_00028530 [Aphis craccivora]
Chr01	17504103	intergenic_region	Chr01.g00432-Chr01.g00433	KAF0726514.1 Uncharacterized protein FWK35_00028530 [Aphis craccivora]
Chr01	17504187	intergenic_region	Chr01.g00432-Chr01.g00433	KAF0726514.1 Uncharacterized protein FWK35_00028530 [Aphis craccivora]
Chr01	17512873	intergenic_region	Chr01.g00432-Chr01.g00433	KAF0726514.1 Uncharacterized protein FWK35_00028530 [Aphis craccivora]
Chr01	17513017	intergenic_region	Chr01.g00432-Chr01.g00433	KAF0726514.1 Uncharacterized protein FWK35_00028530 [Aphis craccivora]
Chr01	17518719	intergenic_region	Chr01.g00432-Chr01.g00433	KAF0726514.1 Uncharacterized protein FWK35_00028530 [Aphis craccivora]
Chr01	17519288	intergenic_region	Chr01.g00432-Chr01.g00433	KAF0726514.1 Uncharacterized protein FWK35_00028530 [Aphis craccivora]
Chr01	17519378	intergenic_region	Chr01.g00432-Chr01.g00433	KAF0726514.1 Uncharacterized protein FWK35_00028530 [Aphis craccivora]
Chr01	17519775	intergenic_region	Chr01.g00432-Chr01.g00433	KAF0726514.1 Uncharacterized protein FWK35_00028530 [Aphis craccivora]
Chr01	17520593	intergenic_region	Chr01.g00432-Chr01.g00433	KAF0726514.1 Uncharacterized protein FWK35_00028530 [Aphis craccivora]
Chr01	17523592	intergenic_region	Chr01.g00432-Chr01.g00433	KAF0726514.1 Uncharacterized protein FWK35_00028530 [Aphis craccivora]
Chr01	17529006	intergenic_region	Chr01.g00432-Chr01.g00433	KAF0726514.1 Uncharacterized protein FWK35_00028530 [Aphis craccivora]
Chr01	17529011	intergenic_region	Chr01.g00432-Chr01.g00433	KAF0726514.1 Uncharacterized protein FWK35_00028530 [Aphis craccivora]
Chr01	17538215	intergenic_region	Chr01.g00432-Chr01.g00433	KAF0726514.1 Uncharacterized protein FWK35_00028530 [Aphis craccivora]
Chr01	17539347	intergenic_region	Chr01.g00432-Chr01.g00433	KAF0726514.1 Uncharacterized protein FWK35_00028530 [Aphis craccivora]
Chr01	17539707	intergenic_region	Chr01.g00432-Chr01.g00433	KAF0726514.1 Uncharacterized protein FWK35_00028530 [Aphis craccivora]
Chr01	17549479	intergenic_region	Chr01.g00432-Chr01.g00433	KAF0726514.1 Uncharacterized protein FWK35_00028530 [Aphis craccivora]
Chr01	17557778	intergenic_region	Chr01.g00432-Chr01.g00433	KAF0726514.1 Uncharacterized protein FWK35_00028530 [Aphis craccivora]
Chr01	17563215	intergenic_region	Chr01.g00432-Chr01.g00433	KAF0726514.1 Uncharacterized protein FWK35_00028530 [Aphis craccivora]
Chr01	17574410	intergenic_region	Chr01.g00432-Chr01.g00433	KAF0726514.1 Uncharacterized protein FWK35_00028530 [Aphis craccivora]
Chr01	17587364	intergenic_region	Chr01.g00432-Chr01.g00433	KAF0726514.1 Uncharacterized protein FWK35_00028530 [Aphis craccivora]
Chr01	17587961	intergenic_region	Chr01.g00432-Chr01.g00433	KAF0726514.1 Uncharacterized protein FWK35_00028530 [Aphis craccivora]
Chr01	17589701	intergenic_region	Chr01.g00432-Chr01.g00433	KAF0726514.1 Uncharacterized protein FWK35_00028530 [Aphis craccivora]
Chr01	17590406	intergenic_region	Chr01.g00432-Chr01.g00433	KAF0726514.1 Uncharacterized protein FWK35_00028530 [Aphis craccivora]
Chr01	17592154	intergenic_region	Chr01.g00432-Chr01.g00433	KAF0726514.1 Uncharacterized protein FWK35_00028530 [Aphis craccivora]
Chr01	17592458	intergenic_region	Chr01.g00432-Chr01.g00433	KAF0726514.1 Uncharacterized protein FWK35_00028530 [Aphis craccivora]
Chr01	17592917	intergenic_region	Chr01.g00432-Chr01.g00433	KAF0726514.1 Uncharacterized protein FWK35_00028530 [Aphis craccivora]
Chr01	17602025	intergenic_region	Chr01.g00432-Chr01.g00433	KAF0726514.1 Uncharacterized protein FWK35_00028530 [Aphis craccivora]
Chr01	17606517	intergenic_region	Chr01.g00432-Chr01.g00433	KAF0726514.1 Uncharacterized protein FWK35_00028530 [Aphis craccivora]
Chr01	17606923	intergenic_region	Chr01.g00432-Chr01.g00433	KAF0726514.1 Uncharacterized protein FWK35_00028530 [Aphis craccivora]
Chr01	17608592	intergenic_region	Chr01.g00432-Chr01.g00433	KAF0726514.1 Uncharacterized protein FWK35_00028530 [Aphis craccivora]
Chr01	17610351	intergenic_region	Chr01.g00432-Chr01.g00433	KAF0726514.1 Uncharacterized protein FWK35_00028530 [Aphis craccivora]
Chr01	17617799	intergenic_region	Chr01.g00432-Chr01.g00433	KAF0726514.1 Uncharacterized protein FWK35_00028530 [Aphis craccivora]
Chr01	17618358	intergenic_region	Chr01.g00432-Chr01.g00433	KAF0726514.1 Uncharacterized protein FWK35_00028530 [Aphis craccivora]
Chr01	17618459	intergenic_region	Chr01.g00432-Chr01.g00433	KAF0726514.1 Uncharacterized protein FWK35_00028530 [Aphis craccivora]
Chr01	17618596	intergenic_region	Chr01.g00432-Chr01.g00433	KAF0726514.1 Uncharacterized protein FWK35_00028530 [Aphis craccivora]
Chr01	17619777	intergenic_region	Chr01.g00432-Chr01.g00433	KAF0726514.1 Uncharacterized protein FWK35_00028530 [Aphis craccivora]
Chr01	17621972	intergenic_region	Chr01.g00432-Chr01.g00433	KAF0726514.1 Uncharacterized protein FWK35_00028530 [Aphis craccivora]
Chr01	17629405	intergenic_region	Chr01.g00432-Chr01.g00433	KAF0726514.1 Uncharacterized protein FWK35_00028530 [Aphis craccivora]
Chr01	17629582	intergenic_region	Chr01.g00432-Chr01.g00433	KAF0726514.1 Uncharacterized protein FWK35_00028530 [Aphis craccivora]
Chr01	17636976	intergenic_region	Chr01.g00432-Chr01.g00433	KAF0726514.1 Uncharacterized protein FWK35_00028530 [Aphis craccivora]
Chr01	17637622	intergenic_region	Chr01.g00432-Chr01.g00433	KAE9536991.1 hypothetical protein AGLY_006798 [Aphis glycines]
Chr01	17643218	intron_variant	Chr01.g00433	KAE9536991.1 hypothetical protein AGLY_006798 [Aphis glycines]
Chr01	17643453	intron_variant	Chr01.g00433	KAE9536991.1 hypothetical protein AGLY_006798 [Aphis glycines]
Chr01	17685561	intergenic_region	Chr01.g00433-Chr01.g00434	KAE9536991.1 hypothetical protein AGLY_006798 [Aphis glycines]
Chr01	17746531	intergenic_region	Chr01.g00434-Chr01.g00435	XP_001945095.2 synaptotagmin-7 [Acyrthosiphon pisum]
Chr01	17746620	intergenic_region	Chr01.g00434-Chr01.g00435	XP_001945095.2 synaptotagmin-7 [Acyrthosiphon pisum]
Chr01	17747237	intergenic_region	Chr01.g00434-Chr01.g00435	XP_001945095.2 synaptotagmin-7 [Acyrthosiphon pisum]
Chr01	17763663	intergenic_region	Chr01.g00434-Chr01.g00435	XP_001945095.2 synaptotagmin-7 [Acyrthosiphon pisum]
Chr01	17764274	intergenic_region	Chr01.g00434-Chr01.g00435	XP_001945095.2 synaptotagmin-7 [Acyrthosiphon pisum]
Chr01	17801189	intergenic_region	Chr01.g00436-Chr01.g00437	XP_022165890.1 synaptotagmin-7 [Myzus persicae]
Chr01	17819767	intergenic_region	Chr01.g00436-Chr01.g00437	XP_022165890.1 synaptotagmin-7 [Myzus persicae]
Chr01	17838841	intergenic_region	Chr01.g00436-Chr01.g00437	XP_022165890.1 synaptotagmin-7 [Myzus persicae]
Chr01	17851069	intergenic_region	Chr01.g00436-Chr01.g00437	XP_022165890.1 synaptotagmin-7 [Myzus persicae]
Chr01	17852867	intergenic_region	Chr01.g00436-Chr01.g00437	XP_022165890.1 synaptotagmin-7 [Myzus persicae]
Chr01	17853160	intergenic_region	Chr01.g00436-Chr01.g00437	XP_022165890.1 synaptotagmin-7 [Myzus persicae]
Chr01	17857524	intergenic_region	Chr01.g00436-Chr01.g00437	XP_022165890.1 synaptotagmin-7 [Myzus persicae]
Chr01	17880549	intergenic_region	Chr01.g00436-Chr01.g00437	XP_022165890.1 synaptotagmin-7 [Myzus persicae]
Chr01	17898939	intergenic_region	Chr01.g00436-Chr01.g00437	XP_022165890.1 synaptotagmin-7 [Myzus persicae]
Chr01	17916080	intergenic_region	Chr01.g00436-Chr01.g00437	XP_022165890.1 synaptotagmin-7 [Myzus persicae]
Chr01	17946025	splice_region_variant&synonymous_variant	Chr01.g00438	XP_003246810.2 phospholipid transfer protein C2CD2L, partial [Acyrthosiphon pisum]
Chr01	17961131	intron_variant	Chr01.g00438	XP_003246810.2 phospholipid transfer protein C2CD2L, partial [Acyrthosiphon pisum]
Chr01	17996862	intergenic_region	Chr01.g00438-Chr01.g00439	XP_003246810.2 phospholipid transfer protein C2CD2L, partial [Acyrthosiphon pisum]
Chr01	18009187	intergenic_region	Chr01.g00438-Chr01.g00439	XP_003246810.2 phospholipid transfer protein C2CD2L, partial [Acyrthosiphon pisum]
Chr01	18014504	intergenic_region	Chr01.g00438-Chr01.g00439	XP_003246810.2 phospholipid transfer protein C2CD2L, partial [Acyrthosiphon pisum]
Chr01	18057748	intergenic_region	Chr01.g00438-Chr01.g00439	XP_003246810.2 phospholipid transfer protein C2CD2L, partial [Acyrthosiphon pisum]
Chr01	18070393	intergenic_region	Chr01.g00438-Chr01.g00439	XP_003246810.2 phospholipid transfer protein C2CD2L, partial [Acyrthosiphon pisum]
Chr01	18070461	intergenic_region	Chr01.g00438-Chr01.g00439	XP_003246810.2 phospholipid transfer protein C2CD2L, partial [Acyrthosiphon pisum]
Chr01	18310600	intergenic_region	Chr01.g00449-Chr01.g00450	XP_003241972.1 uncharacterized protein LOC100569797 [Acyrthosiphon pisum]
Chr01	18380565	missense_variant	Chr01.g00450	XP_029348627.1 uncharacterized protein LOC100575459 isoform X4 [Acyrthosiphon pisum]
Chr01	18423792	intergenic_region	Chr01.g00452-Chr01.g00453	XP_022183006.1 uncharacterized protein LOC111042633 isoform X2 [Myzus persicae]
Chr01	18517501	intergenic_region	Chr01.g00454-Chr01.g00455	XP_022177495.1 uncharacterized protein LOC111038625 [Myzus persicae]
Chr01	18868650	intergenic_region	Chr01.g00460-Chr01.g00461	XP_022172327.1 protein glass-like [Myzus persicae]
Chr01	18869063	intergenic_region	Chr01.g00460-Chr01.g00461	XP_022172327.1 protein glass-like [Myzus persicae]
Chr01	18869197	intergenic_region	Chr01.g00460-Chr01.g00461	XP_022172327.1 protein glass-like [Myzus persicae]
Chr01	18885659	intergenic_region	Chr01.g00460-Chr01.g00461	XP_022172327.1 protein glass-like [Myzus persicae]
Chr01	18936769	intergenic_region	Chr01.g00461-Chr01.g00462
Chr01	18967116	intergenic_region	Chr01.g00461-Chr01.g00462
Chr01	18967207	intergenic_region	Chr01.g00461-Chr01.g00462
Chr01	18969356	intergenic_region	Chr01.g00461-Chr01.g00462
Chr01	18971225	intergenic_region	Chr01.g00461-Chr01.g00462
Chr01	18975126	intergenic_region	Chr01.g00461-Chr01.g00462	XP_003242312.1 zinc finger protein chinmo [Acyrthosiphon pisum]
Chr01	18978241	intergenic_region	Chr01.g00461-Chr01.g00462	XP_003242312.1 zinc finger protein chinmo [Acyrthosiphon pisum]
Chr01	18996773	intergenic_region	Chr01.g00462-Chr01.g00463	XP_003242312.1 zinc finger protein chinmo [Acyrthosiphon pisum]
Chr01	18997046	intergenic_region	Chr01.g00462-Chr01.g00463	XP_003242312.1 zinc finger protein chinmo [Acyrthosiphon pisum]
Chr01	19002998	intergenic_region	Chr01.g00462-Chr01.g00463	XP_003242312.1 zinc finger protein chinmo [Acyrthosiphon pisum]
Chr01	19005835	intergenic_region	Chr01.g00462-Chr01.g00463	XP_003242312.1 zinc finger protein chinmo [Acyrthosiphon pisum]
Chr01	19052330	intergenic_region	Chr01.g00463-Chr01.g00464	XP_016657311.1 probable protein phosphatase CG10417 isoform X1 [Acyrthosiphon pisum]
Chr01	19274353	intergenic_region	Chr01.g00473-Chr01.g00474	KAF0721037.1 protein ALP1-like isoform X1 [Aphis craccivora]
Chr01	19426761	intergenic_region	Chr01.g00478-Chr01.g00479	KAE9526190.1 hypothetical protein AGLY_013821 [Aphis glycines]
Chr01	21254684	missense_variant	Chr01.g00543	NP_001156160.1 uncharacterized protein LOC100163293 [Acyrthosiphon pisum]
Chr01	22219441	intergenic_region	Chr01.g00568-Chr01.g00569	XP_022174906.1 proton-coupled folate transporter-like [Myzus persicae]
Chr01	22228073	intergenic_region	Chr01.g00569-Chr01.g00570	XP_022174906.1 proton-coupled folate transporter-like [Myzus persicae]
Chr01	22228791	intergenic_region	Chr01.g00569-Chr01.g00570	XP_022174906.1 proton-coupled folate transporter-like [Myzus persicae]
Chr01	22228887	intergenic_region	Chr01.g00569-Chr01.g00570	XP_022174906.1 proton-coupled folate transporter-like [Myzus persicae]
Chr01	22229030	intergenic_region	Chr01.g00569-Chr01.g00570	XP_022174906.1 proton-coupled folate transporter-like [Myzus persicae]
Chr01	22239763	intergenic_region	Chr01.g00569-Chr01.g00570	XP_022174906.1 proton-coupled folate transporter-like [Myzus persicae]
Chr01	22245414	intergenic_region	Chr01.g00569-Chr01.g00570	XP_022174906.1 proton-coupled folate transporter-like [Myzus persicae]
Chr01	22253499	intergenic_region	Chr01.g00569-Chr01.g00570	XP_022174906.1 proton-coupled folate transporter-like [Myzus persicae]
Chr01	22254386	intergenic_region	Chr01.g00569-Chr01.g00570	XP_022174906.1 proton-coupled folate transporter-like [Myzus persicae]
Chr01	22255600	intergenic_region	Chr01.g00569-Chr01.g00570	XP_022174906.1 proton-coupled folate transporter-like [Myzus persicae]
Chr01	22256476	intergenic_region	Chr01.g00569-Chr01.g00570	XP_022174906.1 proton-coupled folate transporter-like [Myzus persicae]
Chr01	22256795	intergenic_region	Chr01.g00569-Chr01.g00570	XP_022174906.1 proton-coupled folate transporter-like [Myzus persicae]
Chr01	22256909	intergenic_region	Chr01.g00569-Chr01.g00570	XP_022174906.1 proton-coupled folate transporter-like [Myzus persicae]
Chr01	22256960	intergenic_region	Chr01.g00569-Chr01.g00570	XP_022174906.1 proton-coupled folate transporter-like [Myzus persicae]
Chr01	22623573	intergenic_region	Chr01.g00579-Chr01.g00580	XP_025413748.1 uncharacterized protein LOC112685914 [Sipha flava]
Chr01	23522836	synonymous_variant	Chr01.g00620	KAE9544879.1 hypothetical protein AGLY_000422 [Aphis glycines]
Chr01	27807817	intergenic_region	Chr01.g00752-Chr01.g00753	KAE9531498.1 hypothetical protein AGLY_010704 [Aphis glycines]
Chr01	27808369	intergenic_region	Chr01.g00752-Chr01.g00753	KAE9531498.1 hypothetical protein AGLY_010704 [Aphis glycines]
Chr01	29541262	intergenic_region	Chr01.g00799-Chr01.g00800	KAF0704837.1 mRNA cap guanine-N7 methyltransferase, partial [Aphis craccivora]
Chr01	30973051	synonymous_variant	Chr01.g00863	XP_008184180.1 DDB1- and CUL4-associated factor 1 isoform X1 [Acyrthosiphon pisum]
Chr01	33776409	intron_variant	Chr01.g00931	XP_003246820.1 uncharacterized protein LOC100572943 [Acyrthosiphon pisum]
Chr01	33779188	synonymous_variant	Chr01.g00932	XP_003246820.1 uncharacterized protein LOC100572943 [Acyrthosiphon pisum]
Chr01	36322402	intron_variant	Chr01.g01026	XP_008189097.2 piggyBac transposable element-derived protein 4-like, partial [Acyrthosiphon pisum]
Chr01	36416766	intergenic_region	Chr01.g01033-Chr01.g01034	XP_015369530.1 PREDICTED: male-specific lethal 1-like 1 isoform X3 [Diuraphis noxia]
Chr01	36503189	intergenic_region	Chr01.g01040-Chr01.g01041	XP_031339038.1 protein ANTAGONIST OF LIKE HETEROCHROMATIN PROTEIN 1-like [Photinus pyralis]
Chr01	36603224	missense_variant	Chr01.g01043	XP_003246947.1 uncharacterized protein LOC100573494 [Acyrthosiphon pisum]
Chr01	36648923	intergenic_region	Chr01.g01046-Chr01.g01047	XP_029347606.1 uncharacterized protein LOC115034502 [Acyrthosiphon pisum]
Chr01	36660569	intron_variant	Chr01.g01048	KAE9537481.1 hypothetical protein AGLY_006504 [Aphis glycines]
Chr01	36677716	intergenic_region	Chr01.g01048-Chr01.g01049	KAE9537481.1 hypothetical protein AGLY_006504 [Aphis glycines]
Chr01	37372161	intergenic_region	Chr01.g01055-Chr01.g01056	KAF0767162.1 THAP-type domain-containing protein [Aphis craccivora]
Chr01	37387779	intergenic_region	Chr01.g01055-Chr01.g01056	KAF0767162.1 THAP-type domain-containing protein [Aphis craccivora]
Chr01	37394136	intergenic_region	Chr01.g01055-Chr01.g01056	KAF0767162.1 THAP-type domain-containing protein [Aphis craccivora]
Chr01	37682796	intergenic_region	Chr01.g01070-Chr01.g01071	VVC36603.1 Zinc finger C2H2-type,Zinc finger, RING/FYVE/PHD-type,SET domain [Cinara cedri]
Chr01	37683146	intergenic_region	Chr01.g01070-Chr01.g01071	VVC36603.1 Zinc finger C2H2-type,Zinc finger, RING/FYVE/PHD-type,SET domain [Cinara cedri]
Chr01	37780694	intergenic_region	Chr01.g01078-Chr01.g01079	XP_001949745.2 male-specific lethal 1-like 1 isoform X1 [Acyrthosiphon pisum]
Chr01	37801240	synonymous_variant	Chr01.g01080	XP_015372113.1 PREDICTED: E3 ubiquitin-protein ligase UHRF1-like [Diuraphis noxia]
Chr01	37976126	intergenic_region	Chr01.g01085-Chr01.g01086	KAF0746905.1 Uncharacterized protein FWK35_00025361 [Aphis craccivora]
Chr01	38938941	synonymous_variant	Chr01.g01118	XP_025195789.1 putative inorganic phosphate cotransporter isoform X2 [Melanaphis sacchari]
Chr01	39275938	synonymous_variant	Chr01.g01135	XP_022164980.1 lysine-specific demethylase 4A-like [Myzus persicae]
Chr01	39411237	synonymous_variant	Chr01.g01146	XP_008178962.1 protein eiger [Acyrthosiphon pisum]
Chr01	40424136	3_prime_UTR_variant	Chr01.g01182	XP_001944158.2 uncharacterized protein LOC100160219 isoform X1 [Acyrthosiphon pisum]
Chr01	41005348	synonymous_variant	Chr01.g01209	KAF0757116.1 zinc finger MYM-type protein 6-like, partial [Aphis craccivora]
Chr01	42506823	intergenic_region	Chr01.g01285-Chr01.g01286	KAF0724707.1 Uncharacterized protein FWK35_00025743, partial [Aphis craccivora]
Chr01	42511645	synonymous_variant	Chr01.g01286	XP_015363449.1 PREDICTED: AT-rich interactive domain-containing protein 4A-like isoform X3 [Diuraphis noxia]
Chr01	42511646	missense_variant	Chr01.g01286	XP_015363449.1 PREDICTED: AT-rich interactive domain-containing protein 4A-like isoform X3 [Diuraphis noxia]
Chr01	43964453	intergenic_region	Chr01.g01341-Chr01.g01342	XP_015373933.1 PREDICTED: uncharacterized protein LOC107168897 isoform X2 [Diuraphis noxia]
Chr01	44153153	missense_variant	Chr01.g01345	XP_003248256.2 beta-hexosaminidase subunit beta [Acyrthosiphon pisum]
Chr01	44589437	3_prime_UTR_variant	Chr01.g01355
Chr01	44798476	intron_variant	Chr01.g01367	XP_008179841.2 uncharacterized protein LOC100165959 isoform X1 [Acyrthosiphon pisum]
Chr01	44830974	missense_variant	Chr01.g01368	XP_008179841.2 uncharacterized protein LOC100165959 isoform X1 [Acyrthosiphon pisum]
Chr01	44837855	intergenic_region	Chr01.g01369-Chr01.g01370	XP_008179841.2 uncharacterized protein LOC100165959 isoform X1 [Acyrthosiphon pisum]
Chr01	44838195	intergenic_region	Chr01.g01369-Chr01.g01370	XP_015373789.1 PREDICTED: putative uncharacterized protein DDB_G0271606 [Diuraphis noxia]
Chr01	44856091	intergenic_region	Chr01.g01369-Chr01.g01370	XP_015373789.1 PREDICTED: putative uncharacterized protein DDB_G0271606 [Diuraphis noxia]
Chr01	44919145	intergenic_region	Chr01.g01369-Chr01.g01370	XP_015373789.1 PREDICTED: putative uncharacterized protein DDB_G0271606 [Diuraphis noxia]
Chr01	45012754	intron_variant	Chr01.g01374
Chr01	45015553	synonymous_variant	Chr01.g01374	XP_015374293.1 PREDICTED: protein IWS1 homolog [Diuraphis noxia]
Chr01	45029635	synonymous_variant	Chr01.g01375	XP_022166319.1 nucleolar protein 10 [Myzus persicae]
Chr01	45035737	intron_variant	Chr01.g01376	XP_022166319.1 nucleolar protein 10 [Myzus persicae]
Chr01	45037110	intron_variant	Chr01.g01376	XP_001948436.1 endoplasmic reticulum-Golgi intermediate compartment protein 3 [Acyrthosiphon pisum]
Chr01	45037210	intron_variant	Chr01.g01376	XP_001948436.1 endoplasmic reticulum-Golgi intermediate compartment protein 3 [Acyrthosiphon pisum]
Chr01	45037529	intron_variant	Chr01.g01376	XP_001948436.1 endoplasmic reticulum-Golgi intermediate compartment protein 3 [Acyrthosiphon pisum]
Chr01	45308703	3_prime_UTR_variant	Chr01.g01389	XP_001945496.2 metal transporter CNNM4 isoform X1 [Acyrthosiphon pisum]
Chr01	45369115	intron_variant	Chr01.g01389	XP_001945496.2 metal transporter CNNM4 isoform X1 [Acyrthosiphon pisum]
Chr01	45407130	intergenic_region	Chr01.g01389-Chr01.g01390	XP_001949620.4 NAD-dependent protein deacetylase Sirt6 [Acyrthosiphon pisum]
Chr01	45418938	intron_variant	Chr01.g01390	XP_001949620.4 NAD-dependent protein deacetylase Sirt6 [Acyrthosiphon pisum]
Chr01	45419140	intron_variant	Chr01.g01390	XP_001949620.4 NAD-dependent protein deacetylase Sirt6 [Acyrthosiphon pisum]
Chr01	45420163	intron_variant	Chr01.g01390	XP_001949620.4 NAD-dependent protein deacetylase Sirt6 [Acyrthosiphon pisum]
Chr01	45555130	intergenic_region	Chr01.g01393-Chr01.g01394	XP_008180331.1 neurochondrin homolog [Acyrthosiphon pisum]
Chr01	45564417	missense_variant	Chr01.g01395	XP_003240287.1 circumsporozoite protein [Acyrthosiphon pisum]
Chr01	45577276	synonymous_variant	Chr01.g01397	XP_001951405.1 uncharacterized protein LOC100166545 [Acyrthosiphon pisum]
Chr01	45577436	missense_variant	Chr01.g01397	XP_001951405.1 uncharacterized protein LOC100166545 [Acyrthosiphon pisum]
Chr01	45577548	missense_variant	Chr01.g01397	XP_001951405.1 uncharacterized protein LOC100166545 [Acyrthosiphon pisum]
Chr01	45616980	intron_variant	Chr01.g01398	XP_001949524.2 unc-112-related protein [Acyrthosiphon pisum]
Chr01	45618209	intron_variant	Chr01.g01398	XP_001949524.2 unc-112-related protein [Acyrthosiphon pisum]
Chr01	45620848	intron_variant	Chr01.g01398	XP_001949524.2 unc-112-related protein [Acyrthosiphon pisum]
Chr01	45632491	intron_variant	Chr01.g01398	XP_001949524.2 unc-112-related protein [Acyrthosiphon pisum]
Chr01	45633975	intron_variant	Chr01.g01398
Chr01	45637782	intron_variant	Chr01.g01398
Chr01	45639932	intron_variant	Chr01.g01398	XP_001949524.2 unc-112-related protein [Acyrthosiphon pisum]
Chr01	45640489	intron_variant	Chr01.g01398	XP_001949524.2 unc-112-related protein [Acyrthosiphon pisum]
Chr01	45644554	intron_variant	Chr01.g01398	XP_001949524.2 unc-112-related protein [Acyrthosiphon pisum]
Chr01	45645497	intron_variant	Chr01.g01398	XP_001949524.2 unc-112-related protein [Acyrthosiphon pisum]
Chr01	45657603	intron_variant	Chr01.g01398
Chr01	45664637	intron_variant	Chr01.g01398
Chr01	45671782	intron_variant	Chr01.g01398	XP_001949524.2 unc-112-related protein [Acyrthosiphon pisum]
Chr01	46167165	intergenic_region	Chr01.g01418-Chr01.g01419	XP_016664578.1 uncharacterized protein LOC100162345 isoform X1 [Acyrthosiphon pisum]
Chr01	46193400	intergenic_region	Chr01.g01418-Chr01.g01419	XP_029346962.1 irregular chiasm C-roughest protein [Acyrthosiphon pisum]
Chr01	46193401	intergenic_region	Chr01.g01418-Chr01.g01419	XP_029346962.1 irregular chiasm C-roughest protein [Acyrthosiphon pisum]
Chr01	46194291	intergenic_region	Chr01.g01418-Chr01.g01419	XP_029346962.1 irregular chiasm C-roughest protein [Acyrthosiphon pisum]
Chr01	46194624	intergenic_region	Chr01.g01418-Chr01.g01419	XP_029346962.1 irregular chiasm C-roughest protein [Acyrthosiphon pisum]
Chr01	46226478	intergenic_region	Chr01.g01419-Chr01.g01420	XP_029346962.1 irregular chiasm C-roughest protein [Acyrthosiphon pisum]
Chr01	46246435	intron_variant	Chr01.g01420	XP_029346962.1 irregular chiasm C-roughest protein [Acyrthosiphon pisum]
Chr01	46246615	intron_variant	Chr01.g01420	XP_029346962.1 irregular chiasm C-roughest protein [Acyrthosiphon pisum]
Chr01	46247639	intron_variant	Chr01.g01420	XP_029346962.1 irregular chiasm C-roughest protein [Acyrthosiphon pisum]
Chr01	46268795	intron_variant	Chr01.g01420	XP_029346962.1 irregular chiasm C-roughest protein [Acyrthosiphon pisum]
Chr01	46276028	intergenic_region	Chr01.g01420-Chr01.g01421	XP_029346962.1 irregular chiasm C-roughest protein [Acyrthosiphon pisum]
Chr01	46284404	intergenic_region	Chr01.g01420-Chr01.g01421	XP_029346962.1 irregular chiasm C-roughest protein [Acyrthosiphon pisum]
Chr01	46284492	intergenic_region	Chr01.g01420-Chr01.g01421	XP_029346962.1 irregular chiasm C-roughest protein [Acyrthosiphon pisum]
Chr01	46284561	intergenic_region	Chr01.g01420-Chr01.g01421	XP_029346962.1 irregular chiasm C-roughest protein [Acyrthosiphon pisum]
Chr01	46285105	intergenic_region	Chr01.g01420-Chr01.g01421	XP_029346962.1 irregular chiasm C-roughest protein [Acyrthosiphon pisum]
Chr01	46285527	intergenic_region	Chr01.g01420-Chr01.g01421	XP_029346962.1 irregular chiasm C-roughest protein [Acyrthosiphon pisum]
Chr01	46318492	intergenic_region	Chr01.g01421-Chr01.g01422	XP_029346962.1 irregular chiasm C-roughest protein [Acyrthosiphon pisum]
Chr01	46318611	intergenic_region	Chr01.g01421-Chr01.g01422	XP_029346962.1 irregular chiasm C-roughest protein [Acyrthosiphon pisum]
Chr01	46327946	intergenic_region	Chr01.g01421-Chr01.g01422	XP_029346962.1 irregular chiasm C-roughest protein [Acyrthosiphon pisum]
Chr01	46330618	intergenic_region	Chr01.g01421-Chr01.g01422	XP_029346962.1 irregular chiasm C-roughest protein [Acyrthosiphon pisum]
Chr01	46338053	intergenic_region	Chr01.g01421-Chr01.g01422	XP_029346962.1 irregular chiasm C-roughest protein [Acyrthosiphon pisum]
Chr01	46338698	intergenic_region	Chr01.g01421-Chr01.g01422	XP_029346962.1 irregular chiasm C-roughest protein [Acyrthosiphon pisum]
Chr01	46359609	intergenic_region	Chr01.g01421-Chr01.g01422	XP_029346962.1 irregular chiasm C-roughest protein [Acyrthosiphon pisum]
Chr01	46359735	intergenic_region	Chr01.g01421-Chr01.g01422	XP_029346962.1 irregular chiasm C-roughest protein [Acyrthosiphon pisum]
Chr01	46378951	intergenic_region	Chr01.g01421-Chr01.g01422	XP_029346962.1 irregular chiasm C-roughest protein [Acyrthosiphon pisum]
Chr01	46385071	intergenic_region	Chr01.g01421-Chr01.g01422	XP_029346962.1 irregular chiasm C-roughest protein [Acyrthosiphon pisum]
Chr01	46394649	intron_variant	Chr01.g01422	XP_029346962.1 irregular chiasm C-roughest protein [Acyrthosiphon pisum]
Chr01	46417381	intron_variant	Chr01.g01422	XP_029346962.1 irregular chiasm C-roughest protein [Acyrthosiphon pisum]
Chr01	46417533	intron_variant	Chr01.g01422	XP_029346962.1 irregular chiasm C-roughest protein [Acyrthosiphon pisum]
Chr01	46418323	intron_variant	Chr01.g01422	XP_029346962.1 irregular chiasm C-roughest protein [Acyrthosiphon pisum]
Chr01	46420119	intron_variant	Chr01.g01422	XP_029346962.1 irregular chiasm C-roughest protein [Acyrthosiphon pisum]
Chr01	46426424	intron_variant	Chr01.g01422
Chr01	46676205	intergenic_region	Chr01.g01424-Chr01.g01425	KAE9533294.1 hypothetical protein AGLY_009335 [Aphis glycines]
Chr01	46679445	synonymous_variant	Chr01.g01425	KAE9533294.1 hypothetical protein AGLY_009335 [Aphis glycines]
Chr01	46681476	intron_variant	Chr01.g01425	XP_022166837.1 selT-like protein [Myzus persicae]
Chr01	46686632	missense_variant	Chr01.g01425	KAE9533294.1 hypothetical protein AGLY_009335 [Aphis glycines]
Chr01	46689116	5_prime_UTR_variant	Chr01.g01426	XP_022166837.1 selT-like protein [Myzus persicae]
Chr01	46692068	3_prime_UTR_variant	Chr01.g01426	XP_022166837.1 selT-like protein [Myzus persicae]
Chr01	46692400	3_prime_UTR_variant	Chr01.g01426	XP_022166837.1 selT-like protein [Myzus persicae]
Chr01	46708471	missense_variant	Chr01.g01428	XP_001945569.1 rab11 family-interacting protein 5 isoform X2 [Acyrthosiphon pisum]
Chr01	46714493	3_prime_UTR_variant	Chr01.g01428	XP_001945569.1 rab11 family-interacting protein 5 isoform X2 [Acyrthosiphon pisum]
Chr01	46738394	synonymous_variant	Chr01.g01431	XP_001950634.1 DNA-directed RNA polymerase III subunit RPC2 [Acyrthosiphon pisum]
Chr01	46739165	synonymous_variant	Chr01.g01431	XP_001950634.1 DNA-directed RNA polymerase III subunit RPC2 [Acyrthosiphon pisum]
Chr01	46827283	intron_variant	Chr01.g01434	XP_001943100.1 protein ERGIC-53 [Acyrthosiphon pisum]
Chr01	46827391	intron_variant	Chr01.g01434	XP_001943100.1 protein ERGIC-53 [Acyrthosiphon pisum]
Chr01	46827539	intron_variant	Chr01.g01434	XP_001943100.1 protein ERGIC-53 [Acyrthosiphon pisum]
Chr01	46827737	intron_variant	Chr01.g01434	XP_001943100.1 protein ERGIC-53 [Acyrthosiphon pisum]
Chr01	47075003	synonymous_variant	Chr01.g01444	XP_016662446.1 putative uncharacterized protein DDB_G0282133 [Acyrthosiphon pisum]
Chr01	47096370	missense_variant	Chr01.g01445	NP_001233076.1 uncharacterized protein LOC100166095 [Acyrthosiphon pisum]
Chr01	47329987	intergenic_region	Chr01.g01463-Chr01.g01464	XP_008182646.1 arf-GAP with coiled-coil, ANK repeat and PH domain-containing protein 3 isoform X1 [Acyrthosiphon pisum]
Chr01	47340974	synonymous_variant	Chr01.g01464	XP_003244233.1 docking protein 2 [Acyrthosiphon pisum]
Chr01	47381811	intron_variant	Chr01.g01466	XP_022173972.1 BUD13 homolog [Myzus persicae]
Chr01	47383906	intergenic_region	Chr01.g01466-Chr01.g01467	XP_022173972.1 BUD13 homolog [Myzus persicae]
Chr01	47387885	intergenic_region	Chr01.g01466-Chr01.g01467	XP_022173972.1 BUD13 homolog [Myzus persicae]
Chr01	47413202	intergenic_region	Chr01.g01468-Chr01.g01469	XP_003244235.1 uncharacterized protein LOC100573101 [Acyrthosiphon pisum]
Chr01	47470438	synonymous_variant	Chr01.g01470	XP_001943447.1 uncharacterized protein LOC100168188 [Acyrthosiphon pisum]
Chr01	47592951	intergenic_region	Chr01.g01474-Chr01.g01475	XP_008179776.1 saccharopine dehydrogenase-like oxidoreductase [Acyrthosiphon pisum]
Chr01	47595194	intergenic_region	Chr01.g01474-Chr01.g01475	XP_001948284.2 uncharacterized protein LOC100160334 isoform X1 [Acyrthosiphon pisum]
Chr01	47598731	5_prime_UTR_premature_start_codon_gain_variant	Chr01.g01475	XP_001948284.2 uncharacterized protein LOC100160334 isoform X1 [Acyrthosiphon pisum]
Chr01	47877507	intron_variant	Chr01.g01477	XP_029346856.1 hemicentin-1 [Acyrthosiphon pisum]
Chr01	48007789	intron_variant	Chr01.g01484	XP_022177206.1 piezo-type mechanosensitive ion channel component-like isoform X2 [Myzus persicae]
Chr01	48011454	synonymous_variant	Chr01.g01484	XP_022177206.1 piezo-type mechanosensitive ion channel component-like isoform X2 [Myzus persicae]
Chr01	48021267	intron_variant	Chr01.g01484	XP_022177206.1 piezo-type mechanosensitive ion channel component-like isoform X2 [Myzus persicae]
Chr01	48021296	intron_variant	Chr01.g01484	XP_022177206.1 piezo-type mechanosensitive ion channel component-like isoform X2 [Myzus persicae]
Chr01	48021452	intron_variant	Chr01.g01484	XP_022177206.1 piezo-type mechanosensitive ion channel component-like isoform X2 [Myzus persicae]
Chr01	48045251	intron_variant	Chr01.g01484	NP_001155512.1 DTW domain-containing protein 1 [Acyrthosiphon pisum]
Chr01	48052715	intergenic_region	Chr01.g01485-Chr01.g01486	XP_025195732.1 zinc finger MYM-type protein 1-like [Melanaphis sacchari]
Chr01	48624561	intergenic_region	Chr01.g01499-Chr01.g01500
Chr01	48624957	intergenic_region	Chr01.g01499-Chr01.g01500
Chr01	48626224	intergenic_region	Chr01.g01499-Chr01.g01500
Chr01	48703360	intergenic_region	Chr01.g01499-Chr01.g01500	KAF0753211.1 rho guanine nucleotide exchange factor 7 isoform X2 [Aphis craccivora]
Chr01	48879461	intergenic_region	Chr01.g01507-Chr01.g01508	XP_001944328.2 excitatory amino acid transporter 1 isoform X1 [Acyrthosiphon pisum]
Chr01	49015888	5_prime_UTR_variant	Chr01.g01511	XP_003243738.1 group XV phospholipase A2 [Acyrthosiphon pisum]
Chr01	49113786	intergenic_region	Chr01.g01516-Chr01.g01517	XP_008181878.1 SSXT-domain containing protein isoform X1 [Acyrthosiphon pisum]
Chr01	49115617	intergenic_region	Chr01.g01516-Chr01.g01517	XP_029346679.1 limbic system-associated membrane protein-like [Acyrthosiphon pisum]
Chr01	49115736	intergenic_region	Chr01.g01516-Chr01.g01517	XP_029346679.1 limbic system-associated membrane protein-like [Acyrthosiphon pisum]
Chr01	49115926	intergenic_region	Chr01.g01516-Chr01.g01517	XP_029346679.1 limbic system-associated membrane protein-like [Acyrthosiphon pisum]
Chr01	49116772	intergenic_region	Chr01.g01516-Chr01.g01517	XP_029346679.1 limbic system-associated membrane protein-like [Acyrthosiphon pisum]
Chr01	49149059	intron_variant	Chr01.g01517	XP_029346679.1 limbic system-associated membrane protein-like [Acyrthosiphon pisum]
Chr01	49169299	intron_variant	Chr01.g01517	XP_029346679.1 limbic system-associated membrane protein-like [Acyrthosiphon pisum]
Chr01	49254252	intron_variant	Chr01.g01517	XP_029346679.1 limbic system-associated membrane protein-like [Acyrthosiphon pisum]
Chr01	49263942	intron_variant	Chr01.g01517	XP_029346679.1 limbic system-associated membrane protein-like [Acyrthosiphon pisum]
Chr01	49338718	intron_variant	Chr01.g01517	XP_029346679.1 limbic system-associated membrane protein-like [Acyrthosiphon pisum]
Chr01	49340309	intron_variant	Chr01.g01517	XP_029346679.1 limbic system-associated membrane protein-like [Acyrthosiphon pisum]
Chr01	49341227	intron_variant	Chr01.g01517	XP_029346679.1 limbic system-associated membrane protein-like [Acyrthosiphon pisum]
Chr01	49347382	intron_variant	Chr01.g01517	XP_029346679.1 limbic system-associated membrane protein-like [Acyrthosiphon pisum]
Chr01	49347737	intron_variant	Chr01.g01517	XP_029346679.1 limbic system-associated membrane protein-like [Acyrthosiphon pisum]
Chr01	49356360	intron_variant	Chr01.g01517	XP_029346679.1 limbic system-associated membrane protein-like [Acyrthosiphon pisum]
Chr01	49394052	intron_variant	Chr01.g01517	XP_029346679.1 limbic system-associated membrane protein-like [Acyrthosiphon pisum]
Chr01	49395012	intron_variant	Chr01.g01517	XP_029346679.1 limbic system-associated membrane protein-like [Acyrthosiphon pisum]
Chr01	49406537	intron_variant	Chr01.g01517	XP_029346679.1 limbic system-associated membrane protein-like [Acyrthosiphon pisum]
Chr01	49416692	intron_variant	Chr01.g01517	XP_029346679.1 limbic system-associated membrane protein-like [Acyrthosiphon pisum]
Chr01	49423766	intron_variant	Chr01.g01517	XP_029346679.1 limbic system-associated membrane protein-like [Acyrthosiphon pisum]
Chr01	49436917	intron_variant	Chr01.g01517	XP_029346679.1 limbic system-associated membrane protein-like [Acyrthosiphon pisum]
Chr01	49457550	intron_variant	Chr01.g01517	XP_029346679.1 limbic system-associated membrane protein-like [Acyrthosiphon pisum]
Chr01	49461874	intron_variant	Chr01.g01517	XP_029346679.1 limbic system-associated membrane protein-like [Acyrthosiphon pisum]
Chr01	49490863	intron_variant	Chr01.g01517	XP_029346679.1 limbic system-associated membrane protein-like [Acyrthosiphon pisum]
Chr01	49493503	intron_variant	Chr01.g01517	XP_029346679.1 limbic system-associated membrane protein-like [Acyrthosiphon pisum]
Chr01	49588016	intron_variant	Chr01.g01517	XP_029346679.1 limbic system-associated membrane protein-like [Acyrthosiphon pisum]
Chr01	49611346	intron_variant	Chr01.g01517	XP_029346679.1 limbic system-associated membrane protein-like [Acyrthosiphon pisum]
Chr01	49623127	intron_variant	Chr01.g01517	XP_029346679.1 limbic system-associated membrane protein-like [Acyrthosiphon pisum]
Chr01	49644499	intron_variant	Chr01.g01517	XP_029346679.1 limbic system-associated membrane protein-like [Acyrthosiphon pisum]
Chr01	49667023	intron_variant	Chr01.g01517	XP_029346679.1 limbic system-associated membrane protein-like [Acyrthosiphon pisum]
Chr01	49862920	intron_variant	Chr01.g01527	KAE9521347.1 hypothetical protein AGLY_018251 [Aphis glycines]
Chr01	49879428	intergenic_region	Chr01.g01528-Chr01.g01529	KAE9537969.1 hypothetical protein AGLY_005941 [Aphis glycines]
Chr01	49893251	intergenic_region	Chr01.g01529-Chr01.g01530	XP_003246503.1 uncharacterized protein LOC100574567 [Acyrthosiphon pisum]
Chr01	49919969	synonymous_variant	Chr01.g01531	XP_016662328.1 tubulin polyglutamylase TTLL5 [Acyrthosiphon pisum]
Chr01	49972518	missense_variant	Chr01.g01534	XP_029346630.1 uncharacterized protein LOC100166297 [Acyrthosiphon pisum]
Chr01	50031579	synonymous_variant	Chr01.g01536	KAF0754276.1 protein Teyrha-meyrha-like [Aphis craccivora]
Chr01	50057317	intergenic_region	Chr01.g01537-Chr01.g01538
Chr01	50077952	intergenic_region	Chr01.g01537-Chr01.g01538
Chr01	50078024	intergenic_region	Chr01.g01537-Chr01.g01538
Chr01	50078065	intergenic_region	Chr01.g01537-Chr01.g01538
Chr01	50537593	intron_variant	Chr01.g01567	XP_003244203.1 alpha-tocopherol transfer protein-like isoform X1 [Acyrthosiphon pisum]
Chr01	50537693	intron_variant	Chr01.g01567	XP_003244203.1 alpha-tocopherol transfer protein-like isoform X1 [Acyrthosiphon pisum]
Chr01	50554990	intron_variant	Chr01.g01567	XP_003244203.1 alpha-tocopherol transfer protein-like isoform X1 [Acyrthosiphon pisum]
Chr01	50574709	3_prime_UTR_variant	Chr01.g01567	XP_003244203.1 alpha-tocopherol transfer protein-like isoform X1 [Acyrthosiphon pisum]
Chr01	50590946	intergenic_region	Chr01.g01568-Chr01.g01569	NP_001155520.1 glucosamine-6-phosphate N-acetyltransferase-like [Acyrthosiphon pisum]
Chr01	50593404	intron_variant	Chr01.g01569	XP_025205850.1 dual specificity protein kinase splB-like [Melanaphis sacchari]
Chr01	50597360	synonymous_variant	Chr01.g01570	XP_025205850.1 dual specificity protein kinase splB-like [Melanaphis sacchari]
Chr01	50605748	intergenic_region	Chr01.g01570-Chr01.g01571	XP_025205850.1 dual specificity protein kinase splB-like [Melanaphis sacchari]
Chr01	50707529	intron_variant	Chr01.g01576	XP_022172922.1 RISC-loading complex subunit tarbp2-like isoform X2 [Myzus persicae]
Chr01	50827069	intron_variant	Chr01.g01580	XP_029346465.1 dual specificity mitogen-activated protein kinase kinase 1-like [Acyrthosiphon pisum]
Chr01	50897722	intergenic_region	Chr01.g01582-Chr01.g01583	XP_008188143.1 bestrophin-4 [Acyrthosiphon pisum]
Chr01	50910578	intergenic_region	Chr01.g01584-Chr01.g01585	XP_022172910.1 RE1-silencing transcription factor-like [Myzus persicae]
Chr01	50955822	intron_variant	Chr01.g01588	XP_016663984.1 transcription factor kayak isoform X1 [Acyrthosiphon pisum]
Chr01	50970564	intergenic_region	Chr01.g01588-Chr01.g01589	XP_016663984.1 transcription factor kayak isoform X1 [Acyrthosiphon pisum]
Chr01	50990450	intron_variant	Chr01.g01589	XP_001951256.2 neuroendocrine convertase 2 [Acyrthosiphon pisum]
Chr01	50991193	intron_variant	Chr01.g01589	XP_001951256.2 neuroendocrine convertase 2 [Acyrthosiphon pisum]
Chr01	50991499	intron_variant	Chr01.g01589	XP_001951256.2 neuroendocrine convertase 2 [Acyrthosiphon pisum]
Chr01	51027069	intron_variant	Chr01.g01591	XP_003246500.3 putative fatty acyl-CoA reductase CG8306 [Acyrthosiphon pisum]
Chr01	51033007	3_prime_UTR_variant	Chr01.g01592	XP_001950511.1 putative riboflavin kinase [Acyrthosiphon pisum]
Chr01	51054481	missense_variant	Chr01.g01593	XP_001952405.1 protoporphyrinogen oxidase [Acyrthosiphon pisum]
Chr01	51103351	synonymous_variant	Chr01.g01598	XP_001952390.3 zinc finger and BTB domain-containing protein 14 [Acyrthosiphon pisum]
Chr01	51127531	intron_variant	Chr01.g01599	XP_008188638.1 serine/threonine-protein kinase D1 [Acyrthosiphon pisum]
Chr01	51180713	intergenic_region	Chr01.g01602-Chr01.g01603	XP_016663154.1 LOW QUALITY PROTEIN: saccharopine dehydrogenase-like oxidoreductase [Acyrthosiphon pisum]
Chr01	51186084	intergenic_region	Chr01.g01602-Chr01.g01603	XP_016663160.1 uncharacterized protein LOC100169360 isoform X2 [Acyrthosiphon pisum]
Chr01	51208314	intron_variant	Chr01.g01604	XP_001942629.2 E3 ubiquitin-protein ligase mib1 isoform X1 [Acyrthosiphon pisum]
Chr01	51216773	intron_variant	Chr01.g01604	XP_001942629.2 E3 ubiquitin-protein ligase mib1 isoform X1 [Acyrthosiphon pisum]
Chr01	51226215	intron_variant	Chr01.g01604	XP_001942629.2 E3 ubiquitin-protein ligase mib1 isoform X1 [Acyrthosiphon pisum]
Chr01	51264542	intergenic_region	Chr01.g01605-Chr01.g01606	XP_016661925.1 methyltransferase N6AMT1 [Acyrthosiphon pisum]
Chr01	51481813	synonymous_variant	Chr01.g01614	KAE9521294.1 hypothetical protein AGLY_018313 [Aphis glycines]
Chr01	51772934	intergenic_region	Chr01.g01629-Chr01.g01630	XP_015376710.1 PREDICTED: uncharacterized protein LOC107170991 [Diuraphis noxia]
Chr01	51803275	intergenic_region	Chr01.g01634-Chr01.g01635	KAF0746103.1 piggyBac transposable element-derived protein 4-like, partial [Aphis craccivora]
Chr01	51815728	intergenic_region	Chr01.g01635-Chr01.g01636	XP_022165735.1 piggyBac transposable element-derived protein 4-like [Myzus persicae]
Chr01	51962956	intron_variant	Chr01.g01642	XP_008184334.2 uncharacterized protein LOC100168206 [Acyrthosiphon pisum]
Chr01	51968818	intron_variant	Chr01.g01642	XP_008184334.2 uncharacterized protein LOC100168206 [Acyrthosiphon pisum]
Chr01	51981398	intron_variant	Chr01.g01642	XP_008184334.2 uncharacterized protein LOC100168206 [Acyrthosiphon pisum]
Chr01	52067732	intron_variant	Chr01.g01642	XP_008184334.2 uncharacterized protein LOC100168206 [Acyrthosiphon pisum]
Chr01	52305460	intergenic_region	Chr01.g01647-Chr01.g01648	XP_016660941.1 zinc finger protein 595 isoform X1 [Acyrthosiphon pisum]
Chr01	52344915	intron_variant	Chr01.g01649	XP_029346229.1 neurexin-1 [Acyrthosiphon pisum]
Chr01	52460151	intergenic_region	Chr01.g01651-Chr01.g01652	XP_029346229.1 neurexin-1 [Acyrthosiphon pisum]
Chr01	52460208	intergenic_region	Chr01.g01651-Chr01.g01652	XP_029346229.1 neurexin-1 [Acyrthosiphon pisum]
Chr01	52466066	intergenic_region	Chr01.g01651-Chr01.g01652	XP_029346229.1 neurexin-1 [Acyrthosiphon pisum]
Chr01	52466554	intergenic_region	Chr01.g01651-Chr01.g01652	XP_029346229.1 neurexin-1 [Acyrthosiphon pisum]
Chr01	52467090	intergenic_region	Chr01.g01651-Chr01.g01652	XP_029346229.1 neurexin-1 [Acyrthosiphon pisum]
Chr01	52508761	intergenic_region	Chr01.g01651-Chr01.g01652	XP_029346229.1 neurexin-1 [Acyrthosiphon pisum]
Chr01	52510392	intergenic_region	Chr01.g01651-Chr01.g01652	XP_029346229.1 neurexin-1 [Acyrthosiphon pisum]
Chr01	52511055	intergenic_region	Chr01.g01651-Chr01.g01652	XP_029346229.1 neurexin-1 [Acyrthosiphon pisum]
Chr01	52528138	intergenic_region	Chr01.g01651-Chr01.g01652	XP_029346229.1 neurexin-1 [Acyrthosiphon pisum]
Chr01	52565353	intergenic_region	Chr01.g01651-Chr01.g01652	XP_029346229.1 neurexin-1 [Acyrthosiphon pisum]
Chr01	52798969	3_prime_UTR_variant	Chr01.g01663	XP_001945404.1 FERM domain-containing protein 8 [Acyrthosiphon pisum]
Chr01	52863799	synonymous_variant	Chr01.g01668	XP_001949004.1 ornithine aminotransferase, mitochondrial [Acyrthosiphon pisum]
Chr01	53044768	intergenic_region	Chr01.g01671-Chr01.g01672
Chr01	53075746	intergenic_region	Chr01.g01672-Chr01.g01673
Chr01	53075930	intergenic_region	Chr01.g01672-Chr01.g01673
Chr01	53090530	intergenic_region	Chr01.g01674-Chr01.g01675	XP_027843552.1 merozoite surface antigen 2-like [Aphis gossypii]
Chr01	53092193	intergenic_region	Chr01.g01674-Chr01.g01675	XP_027843552.1 merozoite surface antigen 2-like [Aphis gossypii]
Chr01	53285934	3_prime_UTR_variant	Chr01.g01682	XP_022160563.1 OTU domain-containing protein 5-B-like [Myzus persicae]
Chr01	53286486	3_prime_UTR_variant	Chr01.g01682	XP_022160563.1 OTU domain-containing protein 5-B-like [Myzus persicae]
Chr01	53287406	intergenic_region	Chr01.g01682-Chr01.g01683	XP_022160563.1 OTU domain-containing protein 5-B-like [Myzus persicae]
Chr01	53288175	intergenic_region	Chr01.g01682-Chr01.g01683	XP_022160563.1 OTU domain-containing protein 5-B-like [Myzus persicae]
Chr01	53288950	intergenic_region	Chr01.g01682-Chr01.g01683	XP_022160563.1 OTU domain-containing protein 5-B-like [Myzus persicae]
Chr01	53290121	intergenic_region	Chr01.g01682-Chr01.g01683	XP_022160563.1 OTU domain-containing protein 5-B-like [Myzus persicae]
Chr01	53410591	synonymous_variant	Chr01.g01684	XP_001952327.2 zinc finger protein rotund [Acyrthosiphon pisum]
Chr01	53438997	5_prime_UTR_variant	Chr01.g01684	XP_001952327.2 zinc finger protein rotund [Acyrthosiphon pisum]
Chr01	53719106	intergenic_region	Chr01.g01689-Chr01.g01690	XP_003243468.1 E3 ubiquitin-protein ligase synoviolin B isoform X3 [Acyrthosiphon pisum]
Chr01	53721769	3_prime_UTR_variant	Chr01.g01690	XP_003243468.1 E3 ubiquitin-protein ligase synoviolin B isoform X3 [Acyrthosiphon pisum]
Chr01	53722020	3_prime_UTR_variant	Chr01.g01690	XP_003243468.1 E3 ubiquitin-protein ligase synoviolin B isoform X3 [Acyrthosiphon pisum]
Chr01	53756052	intergenic_region	Chr01.g01691-Chr01.g01692	XP_008181485.1 chymotrypsin-1-like [Acyrthosiphon pisum]
Chr01	53809511	intergenic_region	Chr01.g01694-Chr01.g01695	XP_001949810.1 SWI5-dependent HO expression protein 3 isoform X1 [Acyrthosiphon pisum]
Chr01	53810227	3_prime_UTR_variant	Chr01.g01695	XP_001949810.1 SWI5-dependent HO expression protein 3 isoform X1 [Acyrthosiphon pisum]
Chr01	53811246	synonymous_variant	Chr01.g01695	XP_001949810.1 SWI5-dependent HO expression protein 3 isoform X1 [Acyrthosiphon pisum]
Chr01	53880762	intergenic_region	Chr01.g01699-Chr01.g01700	XP_003244182.1 uncharacterized protein LOC100569581 isoform X1 [Acyrthosiphon pisum]
Chr01	53896571	synonymous_variant	Chr01.g01700	XP_008182565.1 catenin delta-2 isoform X1 [Acyrthosiphon pisum]
Chr01	53927108	intergenic_region	Chr01.g01700-Chr01.g01701	XP_008182565.1 catenin delta-2 isoform X1 [Acyrthosiphon pisum]
Chr01	53929343	intergenic_region	Chr01.g01700-Chr01.g01701	XP_008182565.1 catenin delta-2 isoform X1 [Acyrthosiphon pisum]
Chr01	53929582	intergenic_region	Chr01.g01700-Chr01.g01701	XP_008182565.1 catenin delta-2 isoform X1 [Acyrthosiphon pisum]
Chr01	54060873	intergenic_region	Chr01.g01703-Chr01.g01704	XP_025195161.1 piggyBac transposable element-derived protein 4-like [Melanaphis sacchari]
Chr01	54062579	intron_variant	Chr01.g01704	XP_026819165.1 piggyBac transposable element-derived protein 4-like [Rhopalosiphum maidis]
Chr01	54062734	intron_variant	Chr01.g01704	XP_026819165.1 piggyBac transposable element-derived protein 4-like [Rhopalosiphum maidis]
Chr01	54087187	intron_variant	Chr01.g01706	XP_008182560.1 FERM domain-containing protein 4B [Acyrthosiphon pisum]
Chr01	54204653	synonymous_variant	Chr01.g01708	XP_008187866.1 cationic amino acid transporter 2 isoform X1 [Acyrthosiphon pisum]
Chr01	54288972	intergenic_region	Chr01.g01711-Chr01.g01712	XP_025207422.1 KRAB-A domain-containing protein 2-like [Melanaphis sacchari]
Chr01	54299594	intron_variant	Chr01.g01713	XP_008187866.1 cationic amino acid transporter 2 isoform X1 [Acyrthosiphon pisum]
Chr01	54305424	intron_variant	Chr01.g01713	XP_008187866.1 cationic amino acid transporter 2 isoform X1 [Acyrthosiphon pisum]
Chr01	54305469	intron_variant	Chr01.g01713	XP_008187866.1 cationic amino acid transporter 2 isoform X1 [Acyrthosiphon pisum]
Chr01	54305883	intron_variant	Chr01.g01713	XP_008187866.1 cationic amino acid transporter 2 isoform X1 [Acyrthosiphon pisum]
Chr01	54306184	intron_variant	Chr01.g01713	XP_008187866.1 cationic amino acid transporter 2 isoform X1 [Acyrthosiphon pisum]
Chr01	54306294	intron_variant	Chr01.g01713	XP_008187866.1 cationic amino acid transporter 2 isoform X1 [Acyrthosiphon pisum]
Chr01	54306730	intron_variant	Chr01.g01713	XP_008187866.1 cationic amino acid transporter 2 isoform X1 [Acyrthosiphon pisum]
Chr01	54307621	intron_variant	Chr01.g01713	XP_008187866.1 cationic amino acid transporter 2 isoform X1 [Acyrthosiphon pisum]
Chr01	54307634	intron_variant	Chr01.g01713	XP_008187866.1 cationic amino acid transporter 2 isoform X1 [Acyrthosiphon pisum]
Chr01	54307911	intron_variant	Chr01.g01713	XP_008187866.1 cationic amino acid transporter 2 isoform X1 [Acyrthosiphon pisum]
Chr01	54308030	intron_variant	Chr01.g01713	XP_008187866.1 cationic amino acid transporter 2 isoform X1 [Acyrthosiphon pisum]
Chr01	54397193	intron_variant	Chr01.g01715	XP_001951753.1 uncharacterized protein LOC100168862 isoform X1 [Acyrthosiphon pisum]
Chr01	54397457	intron_variant	Chr01.g01715	XP_001951753.1 uncharacterized protein LOC100168862 isoform X1 [Acyrthosiphon pisum]
Chr01	54397998	intron_variant	Chr01.g01715	XP_001951753.1 uncharacterized protein LOC100168862 isoform X1 [Acyrthosiphon pisum]
Chr01	54401566	intron_variant	Chr01.g01715	XP_001951753.1 uncharacterized protein LOC100168862 isoform X1 [Acyrthosiphon pisum]
Chr01	54743067	intergenic_region	Chr01.g01735-Chr01.g01736	XP_015363635.1 PREDICTED: uncharacterized protein LOC107161656 [Diuraphis noxia]
Chr01	54798026	intergenic_region	Chr01.g01736-Chr01.g01737
Chr01	54798879	intergenic_region	Chr01.g01736-Chr01.g01737
Chr01	54803015	intergenic_region	Chr01.g01736-Chr01.g01737
Chr01	54803853	intergenic_region	Chr01.g01736-Chr01.g01737
Chr01	54829504	intergenic_region	Chr01.g01736-Chr01.g01737
Chr01	54829772	intergenic_region	Chr01.g01736-Chr01.g01737
Chr01	54829915	intergenic_region	Chr01.g01736-Chr01.g01737
Chr01	54831641	intergenic_region	Chr01.g01736-Chr01.g01737
Chr01	54835440	intergenic_region	Chr01.g01736-Chr01.g01737
Chr01	54836362	intergenic_region	Chr01.g01736-Chr01.g01737
Chr01	54836852	intergenic_region	Chr01.g01736-Chr01.g01737
Chr01	54843214	intergenic_region	Chr01.g01736-Chr01.g01737
Chr01	54870349	intergenic_region	Chr01.g01736-Chr01.g01737
Chr01	54870372	intergenic_region	Chr01.g01736-Chr01.g01737
Chr01	54874176	intergenic_region	Chr01.g01736-Chr01.g01737
Chr01	54889201	intergenic_region	Chr01.g01736-Chr01.g01737
Chr01	55157075	intron_variant	Chr01.g01746	XP_029345917.1 nephrin-like [Acyrthosiphon pisum]
Chr01	55157812	intron_variant	Chr01.g01746	XP_029345917.1 nephrin-like [Acyrthosiphon pisum]
Chr01	55158397	intron_variant	Chr01.g01746	XP_029345917.1 nephrin-like [Acyrthosiphon pisum]
Chr01	55158418	intron_variant	Chr01.g01746	XP_029345917.1 nephrin-like [Acyrthosiphon pisum]
Chr01	55158569	intron_variant	Chr01.g01746	XP_029345917.1 nephrin-like [Acyrthosiphon pisum]
Chr01	55170528	intron_variant	Chr01.g01746	XP_029345917.1 nephrin-like [Acyrthosiphon pisum]
Chr01	55204514	intron_variant	Chr01.g01746	XP_029345917.1 nephrin-like [Acyrthosiphon pisum]
Chr01	55241058	intron_variant	Chr01.g01746	XP_029345917.1 nephrin-like [Acyrthosiphon pisum]
Chr01	55241602	intron_variant	Chr01.g01746	XP_029345917.1 nephrin-like [Acyrthosiphon pisum]
Chr01	55243732	intron_variant	Chr01.g01746	XP_029345917.1 nephrin-like [Acyrthosiphon pisum]
Chr01	55243767	intron_variant	Chr01.g01746	XP_029345917.1 nephrin-like [Acyrthosiphon pisum]
Chr01	55246256	intron_variant	Chr01.g01746	XP_029345917.1 nephrin-like [Acyrthosiphon pisum]
Chr01	55246830	intron_variant	Chr01.g01746	XP_029345917.1 nephrin-like [Acyrthosiphon pisum]
Chr01	55249049	intron_variant	Chr01.g01746	XP_029345917.1 nephrin-like [Acyrthosiphon pisum]
Chr01	55267056	intron_variant	Chr01.g01746	XP_029345917.1 nephrin-like [Acyrthosiphon pisum]
Chr01	55298261	intron_variant	Chr01.g01746	XP_029345917.1 nephrin-like [Acyrthosiphon pisum]
Chr01	55328078	intron_variant	Chr01.g01746	XP_029345917.1 nephrin-like [Acyrthosiphon pisum]
Chr01	55328525	intron_variant	Chr01.g01746	XP_029345917.1 nephrin-like [Acyrthosiphon pisum]
Chr01	55335313	intron_variant	Chr01.g01746	XP_029345917.1 nephrin-like [Acyrthosiphon pisum]
Chr01	55352814	intron_variant	Chr01.g01746	XP_029345917.1 nephrin-like [Acyrthosiphon pisum]
Chr01	55361059	intron_variant	Chr01.g01746	XP_029345917.1 nephrin-like [Acyrthosiphon pisum]
Chr01	55374361	intron_variant	Chr01.g01746	XP_029345917.1 nephrin-like [Acyrthosiphon pisum]
Chr01	55374626	intron_variant	Chr01.g01746	XP_029345917.1 nephrin-like [Acyrthosiphon pisum]
Chr01	55386548	intron_variant	Chr01.g01746	XP_029345917.1 nephrin-like [Acyrthosiphon pisum]
Chr01	55402732	intron_variant	Chr01.g01746	XP_029345917.1 nephrin-like [Acyrthosiphon pisum]
Chr01	55407569	intron_variant	Chr01.g01746	XP_029345917.1 nephrin-like [Acyrthosiphon pisum]
Chr01	55411393	intron_variant	Chr01.g01746	XP_029345917.1 nephrin-like [Acyrthosiphon pisum]
Chr01	55411713	intron_variant	Chr01.g01746	XP_029345917.1 nephrin-like [Acyrthosiphon pisum]
Chr01	55460369	intron_variant	Chr01.g01746	XP_029345917.1 nephrin-like [Acyrthosiphon pisum]
Chr01	55468957	intron_variant	Chr01.g01746	XP_029345917.1 nephrin-like [Acyrthosiphon pisum]
Chr01	55469262	intron_variant	Chr01.g01746	XP_029345917.1 nephrin-like [Acyrthosiphon pisum]
Chr01	55471820	intron_variant	Chr01.g01746	XP_029345917.1 nephrin-like [Acyrthosiphon pisum]
Chr01	55500104	intron_variant	Chr01.g01746	XP_029345917.1 nephrin-like [Acyrthosiphon pisum]
Chr01	55524383	intron_variant	Chr01.g01746	XP_029345917.1 nephrin-like [Acyrthosiphon pisum]
Chr01	55539925	intron_variant	Chr01.g01746	XP_029345917.1 nephrin-like [Acyrthosiphon pisum]
Chr01	55547191	intron_variant	Chr01.g01746	XP_029345917.1 nephrin-like [Acyrthosiphon pisum]
Chr01	55606243	intron_variant	Chr01.g01746	XP_029345917.1 nephrin-like [Acyrthosiphon pisum]
Chr01	55610762	intron_variant	Chr01.g01746	XP_029345917.1 nephrin-like [Acyrthosiphon pisum]
Chr01	55629696	intergenic_region	Chr01.g01746-Chr01.g01747	XP_029345917.1 nephrin-like [Acyrthosiphon pisum]
Chr01	55629870	intergenic_region	Chr01.g01746-Chr01.g01747	XP_029345917.1 nephrin-like [Acyrthosiphon pisum]
Chr01	55630295	intergenic_region	Chr01.g01746-Chr01.g01747	XP_029345917.1 nephrin-like [Acyrthosiphon pisum]
Chr01	55650332	intergenic_region	Chr01.g01748-Chr01.g01749	KAF0702823.1 KRAB-A domain-containing protein 2-like, partial [Aphis craccivora]
Chr01	55653217	intron_variant	Chr01.g01749	XP_001948392.1 abhydrolase domain-containing protein 2 [Acyrthosiphon pisum]
Chr01	55690034	intergenic_region	Chr01.g01751-Chr01.g01752	XP_003241193.1 hyphally regulated cell wall protein 3 [Acyrthosiphon pisum]
Chr01	55747259	synonymous_variant	Chr01.g01754	XP_003241191.1 liver carboxylesterase 2 [Acyrthosiphon pisum]
Chr01	55747385	synonymous_variant	Chr01.g01754	XP_003241191.1 liver carboxylesterase 2 [Acyrthosiphon pisum]
Chr01	55869091	intergenic_region	Chr01.g01757-Chr01.g01758	NP_001155799.1 uncharacterized protein LOC100168749 precursor [Acyrthosiphon pisum]
Chr01	56178181	intron_variant	Chr01.g01773	XP_008181545.1 homeobox protein homothorax isoform X1 [Acyrthosiphon pisum]
Chr01	56199586	intron_variant	Chr01.g01773	XP_008181545.1 homeobox protein homothorax isoform X1 [Acyrthosiphon pisum]
Chr01	56201867	intron_variant	Chr01.g01773	XP_008181545.1 homeobox protein homothorax isoform X1 [Acyrthosiphon pisum]
Chr01	56202068	intron_variant	Chr01.g01773	XP_008181545.1 homeobox protein homothorax isoform X1 [Acyrthosiphon pisum]
Chr01	56203035	intron_variant	Chr01.g01773	XP_008181545.1 homeobox protein homothorax isoform X1 [Acyrthosiphon pisum]
Chr01	56333107	intron_variant	Chr01.g01776	XP_022182311.1 ionotropic receptor 40a isoform X2 [Myzus persicae]
Chr01	56435328	intron_variant	Chr01.g01778	XP_003246138.1 ETS-like protein pointed [Acyrthosiphon pisum]
Chr01	56854183	intron_variant	Chr01.g01789	XP_022166192.1 uncharacterized protein CG45076-like isoform X1 [Myzus persicae]
Chr01	56862667	intergenic_region	Chr01.g01789-Chr01.g01790	XP_022166192.1 uncharacterized protein CG45076-like isoform X1 [Myzus persicae]
Chr01	56898314	missense_variant	Chr01.g01791	XP_003242640.1 uncharacterized protein LOC100569330 [Acyrthosiphon pisum]
Chr01	56961875	5_prime_UTR_variant	Chr01.g01796	XP_003242639.1 putative uncharacterized protein DDB_G0271606 isoform X1 [Acyrthosiphon pisum]
Chr01	56980894	intergenic_region	Chr01.g01796-Chr01.g01797	XP_003242639.1 putative uncharacterized protein DDB_G0271606 isoform X1 [Acyrthosiphon pisum]
Chr01	56996234	intergenic_region	Chr01.g01796-Chr01.g01797	XP_016657684.1 uncharacterized protein LOC100161772 isoform X2 [Acyrthosiphon pisum]
Chr01	57023347	intron_variant	Chr01.g01797	XP_008180293.1 uncharacterized protein LOC100161772 isoform X4 [Acyrthosiphon pisum]
Chr01	57023525	intron_variant	Chr01.g01797	XP_008180293.1 uncharacterized protein LOC100161772 isoform X4 [Acyrthosiphon pisum]
Chr01	57028836	missense_variant	Chr01.g01798	XP_008180293.1 uncharacterized protein LOC100161772 isoform X4 [Acyrthosiphon pisum]
Chr01	57028921	synonymous_variant	Chr01.g01798	XP_008180293.1 uncharacterized protein LOC100161772 isoform X4 [Acyrthosiphon pisum]
Chr01	57032249	intergenic_region	Chr01.g01798-Chr01.g01799	XP_008180293.1 uncharacterized protein LOC100161772 isoform X4 [Acyrthosiphon pisum]
Chr01	57108858	intron_variant	Chr01.g01802	XP_001949265.2 mannosyl-oligosaccharide glucosidase [Acyrthosiphon pisum]
Chr01	57111135	intergenic_region	Chr01.g01802-Chr01.g01803	NP_001280347.1 ATP synthase mitochondrial F1 complex assembly factor 1 [Acyrthosiphon pisum]
Chr01	57115665	intergenic_region	Chr01.g01802-Chr01.g01803
Chr01	57125312	missense_variant	Chr01.g01805	XP_001949109.2 mucin-5AC [Acyrthosiphon pisum]
Chr01	57133605	missense_variant	Chr01.g01805	XP_001949109.2 mucin-5AC [Acyrthosiphon pisum]
Chr01	57137380	synonymous_variant	Chr01.g01806	XP_003248604.1 uncharacterized protein LOC100571531 [Acyrthosiphon pisum]
Chr01	57141112	intergenic_region	Chr01.g01806-Chr01.g01807	XP_003248604.1 uncharacterized protein LOC100571531 [Acyrthosiphon pisum]
Chr01	57141283	intergenic_region	Chr01.g01806-Chr01.g01807	XP_003248604.1 uncharacterized protein LOC100571531 [Acyrthosiphon pisum]
Chr01	57186296	intron_variant	Chr01.g01807	XP_001946483.2 LOW QUALITY PROTEIN: ceramide glucosyltransferase [Acyrthosiphon pisum]
Chr01	57188108	intergenic_region	Chr01.g01807-Chr01.g01808	XP_001946483.2 LOW QUALITY PROTEIN: ceramide glucosyltransferase [Acyrthosiphon pisum]
Chr01	57208637	intergenic_region	Chr01.g01808-Chr01.g01809	XP_001945220.2 uncharacterized protein LOC100165139 isoform X1 [Acyrthosiphon pisum]
Chr01	57230932	synonymous_variant	Chr01.g01809	XP_029345672.1 uncharacterized protein LOC100167373 isoform X2 [Acyrthosiphon pisum]
Chr01	57383754	intron_variant	Chr01.g01821	XP_008181491.1 neural cell adhesion molecule 2 [Acyrthosiphon pisum]
Chr01	57385314	splice_region_variant&intron_variant	Chr01.g01821	XP_008181491.1 neural cell adhesion molecule 2 [Acyrthosiphon pisum]
Chr01	57389635	intron_variant	Chr01.g01821	XP_008181491.1 neural cell adhesion molecule 2 [Acyrthosiphon pisum]
Chr01	57389743	intron_variant	Chr01.g01821	XP_008181491.1 neural cell adhesion molecule 2 [Acyrthosiphon pisum]
Chr01	57418054	intron_variant	Chr01.g01821	XP_008181491.1 neural cell adhesion molecule 2 [Acyrthosiphon pisum]
Chr01	57422615	missense_variant	Chr01.g01821	XP_008181491.1 neural cell adhesion molecule 2 [Acyrthosiphon pisum]
Chr01	57561432	synonymous_variant	Chr01.g01825	XP_001943120.2 hemicentin-1 isoform X1 [Acyrthosiphon pisum]
Chr01	57562689	synonymous_variant	Chr01.g01825	XP_001943120.2 hemicentin-1 isoform X1 [Acyrthosiphon pisum]
Chr01	57591266	intergenic_region	Chr01.g01825-Chr01.g01826	XP_001943120.2 hemicentin-1 isoform X1 [Acyrthosiphon pisum]
Chr01	57827565	intergenic_region	Chr01.g01834-Chr01.g01835	XP_003247245.1 long-chain-fatty-acid--CoA ligase 4 isoform X1 [Acyrthosiphon pisum]
Chr01	58014608	intergenic_region	Chr01.g01838-Chr01.g01839	XP_008183617.1 glycerol kinase [Acyrthosiphon pisum]
Chr01	58014786	intergenic_region	Chr01.g01838-Chr01.g01839	XP_008183617.1 glycerol kinase [Acyrthosiphon pisum]
Chr01	58034670	intron_variant	Chr01.g01842	XP_001948109.1 geminin isoform X2 [Acyrthosiphon pisum]
Chr01	58037356	intergenic_region	Chr01.g01842-Chr01.g01843	XP_029345555.1 poly(rC)-binding protein 3-like [Acyrthosiphon pisum]
Chr01	58043341	intergenic_region	Chr01.g01843-Chr01.g01844	XP_029345555.1 poly(rC)-binding protein 3-like [Acyrthosiphon pisum]
Chr01	58194309	5_prime_UTR_variant	Chr01.g01851	XP_022172102.1 protein big brother-like [Myzus persicae]
Chr01	58294128	3_prime_UTR_variant	Chr01.g01853	XP_001948532.1 core-binding factor subunit beta [Acyrthosiphon pisum]
Chr01	58294474	synonymous_variant	Chr01.g01853	XP_001948532.1 core-binding factor subunit beta [Acyrthosiphon pisum]
Chr01	58301768	intron_variant	Chr01.g01853	XP_001948532.1 core-binding factor subunit beta [Acyrthosiphon pisum]
Chr01	58338354	intron_variant	Chr01.g01855	XP_022172104.1 H/ACA ribonucleoprotein complex non-core subunit NAF1 [Myzus persicae]
Chr01	58544320	synonymous_variant	Chr01.g01863	XP_008188736.1 RAD50-interacting protein 1 [Acyrthosiphon pisum]
Chr01	58553031	intergenic_region	Chr01.g01864-Chr01.g01865	XP_008188744.1 succinate--CoA ligase [GDP-forming] subunit beta, mitochondrial [Acyrthosiphon pisum]
Chr01	58558160	intron_variant	Chr01.g01865	KAF0721258.1 THAP domain-containing protein 2-like [Aphis craccivora]
Chr01	58688329	intron_variant	Chr01.g01874	XP_029344345.1 uncharacterized LOC100166657 isoform X1 [Acyrthosiphon pisum]
Chr01	58690152	intron_variant	Chr01.g01874	XP_029344345.1 uncharacterized LOC100166657 isoform X1 [Acyrthosiphon pisum]
Chr01	58692339	5_prime_UTR_premature_start_codon_gain_variant	Chr01.g01875	XP_029344345.1 uncharacterized LOC100166657 isoform X1 [Acyrthosiphon pisum]
Chr01	58738500	intergenic_region	Chr01.g01876-Chr01.g01877	XP_003244537.1 uncharacterized protein LOC100572039 isoform X1 [Acyrthosiphon pisum]
Chr01	58780733	intergenic_region	Chr01.g01878-Chr01.g01879	XP_001947205.2 scavenger receptor class B member 1 isoform X2 [Acyrthosiphon pisum]
Chr01	58784564	3_prime_UTR_variant	Chr01.g01879	XP_001947205.2 scavenger receptor class B member 1 isoform X2 [Acyrthosiphon pisum]
Chr01	58784662	3_prime_UTR_variant	Chr01.g01879	XP_001947205.2 scavenger receptor class B member 1 isoform X2 [Acyrthosiphon pisum]
Chr01	58800593	intron_variant	Chr01.g01879	XP_001947205.2 scavenger receptor class B member 1 isoform X2 [Acyrthosiphon pisum]
Chr01	58805117	intron_variant	Chr01.g01879	XP_001947205.2 scavenger receptor class B member 1 isoform X2 [Acyrthosiphon pisum]
Chr01	58835415	intergenic_region	Chr01.g01879-Chr01.g01880	XP_001947205.2 scavenger receptor class B member 1 isoform X2 [Acyrthosiphon pisum]
Chr01	59123306	intron_variant	Chr01.g01887	XP_001947112.2 protein DENND6B [Acyrthosiphon pisum]
Chr01	59126050	intron_variant	Chr01.g01887	XP_001947112.2 protein DENND6B [Acyrthosiphon pisum]
Chr01	59170679	intergenic_region	Chr01.g01888-Chr01.g01889
Chr01	59348099	intergenic_region	Chr01.g01888-Chr01.g01889
Chr01	59386800	synonymous_variant	Chr01.g01889	XP_016664515.1 rho GTPase-activating protein 190 isoform X4 [Acyrthosiphon pisum]
Chr01	59396559	intron_variant	Chr01.g01889	XP_016664515.1 rho GTPase-activating protein 190 isoform X4 [Acyrthosiphon pisum]
Chr01	59686197	synonymous_variant	Chr01.g01891	XP_029345433.1 probable nuclear hormone receptor HR38 isoform X2 [Acyrthosiphon pisum]
Chr01	59715800	missense_variant	Chr01.g01894	XP_015373475.1 PREDICTED: uncharacterized protein LOC107168542 isoform X2 [Diuraphis noxia]
Chr01	60176202	synonymous_variant	Chr01.g01921	XP_001944785.3 MPN domain-containing protein isoform X1 [Acyrthosiphon pisum]
Chr01	60267753	intergenic_region	Chr01.g01922-Chr01.g01923	XP_022178686.1 cilia- and flagella-associated protein 57-like, partial [Myzus persicae]
Chr01	60278992	intergenic_region	Chr01.g01922-Chr01.g01923	XP_022178686.1 cilia- and flagella-associated protein 57-like, partial [Myzus persicae]
Chr01	60474849	intron_variant	Chr01.g01928	XP_026820432.1 protein stum [Rhopalosiphum maidis]
Chr01	60474872	intron_variant	Chr01.g01928	XP_026820432.1 protein stum [Rhopalosiphum maidis]
Chr01	60545910	intergenic_region	Chr01.g01932-Chr01.g01934
Chr01	60546386	intergenic_region	Chr01.g01932-Chr01.g01934
Chr01	60546738	intergenic_region	Chr01.g01932-Chr01.g01934
Chr01	60672097	intron_variant	Chr01.g01937	XP_001950534.1 actin-related protein 2 [Acyrthosiphon pisum]
Chr01	60864388	missense_variant	Chr01.g01949	XP_001945230.2 DNA polymerase eta-like [Acyrthosiphon pisum]
Chr01	60867463	intergenic_region	Chr01.g01949-Chr01.g01950	XP_001945230.2 DNA polymerase eta-like [Acyrthosiphon pisum]
Chr01	60868444	intergenic_region	Chr01.g01949-Chr01.g01950	XP_001945230.2 DNA polymerase eta-like [Acyrthosiphon pisum]
Chr01	60869775	intergenic_region	Chr01.g01949-Chr01.g01950	XP_008178376.1 transcription initiation factor TFIID subunit 3 isoform X2 [Acyrthosiphon pisum]
Chr01	60882212	missense_variant	Chr01.g01951	XP_003241370.1 UBX domain-containing protein 4 [Acyrthosiphon pisum]
Chr01	60882689	intron_variant	Chr01.g01951	XP_008178376.1 transcription initiation factor TFIID subunit 3 isoform X2 [Acyrthosiphon pisum]
Chr01	60882738	intron_variant	Chr01.g01951	XP_008178376.1 transcription initiation factor TFIID subunit 3 isoform X2 [Acyrthosiphon pisum]
Chr01	60882843	intron_variant	Chr01.g01951	XP_008178376.1 transcription initiation factor TFIID subunit 3 isoform X2 [Acyrthosiphon pisum]
Chr01	60884930	intron_variant	Chr01.g01951	XP_008178376.1 transcription initiation factor TFIID subunit 3 isoform X2 [Acyrthosiphon pisum]
Chr01	60901190	missense_variant	Chr01.g01953	XP_001948907.3 probable serine/threonine-protein kinase DDB_G0282963 [Acyrthosiphon pisum]
Chr01	60901219	missense_variant	Chr01.g01953	XP_001948907.3 probable serine/threonine-protein kinase DDB_G0282963 [Acyrthosiphon pisum]
Chr01	60903444	missense_variant	Chr01.g01953	XP_001948907.3 probable serine/threonine-protein kinase DDB_G0282963 [Acyrthosiphon pisum]
Chr01	60914910	intron_variant	Chr01.g01953	XP_001948907.3 probable serine/threonine-protein kinase DDB_G0282963 [Acyrthosiphon pisum]
Chr01	61072367	intergenic_region	Chr01.g01958-Chr01.g01959	XP_003246483.1 ropporin-1-like [Acyrthosiphon pisum]
Chr01	61347417	3_prime_UTR_variant	Chr01.g01971	XP_029345051.1 two pore potassium channel protein sup-9 [Acyrthosiphon pisum]
Chr01	61363366	intron_variant	Chr01.g01971	XP_029345051.1 two pore potassium channel protein sup-9 [Acyrthosiphon pisum]
Chr01	61363425	intron_variant	Chr01.g01971	XP_029345051.1 two pore potassium channel protein sup-9 [Acyrthosiphon pisum]
Chr01	61363826	intron_variant	Chr01.g01971	XP_029345051.1 two pore potassium channel protein sup-9 [Acyrthosiphon pisum]
Chr01	61377359	synonymous_variant	Chr01.g01971	XP_029345051.1 two pore potassium channel protein sup-9 [Acyrthosiphon pisum]
Chr01	61449047	3_prime_UTR_variant	Chr01.g01972	XP_003247934.1 uncharacterized protein LOC100569613 [Acyrthosiphon pisum]
Chr01	61467698	synonymous_variant	Chr01.g01973	XP_008188121.1 amino acid transporter AVT1J isoform X1 [Acyrthosiphon pisum]
Chr01	61480305	intergenic_region	Chr01.g01973-Chr01.g01974	XP_008188121.1 amino acid transporter AVT1J isoform X1 [Acyrthosiphon pisum]
Chr01	61595479	synonymous_variant	Chr01.g01978	XP_008189366.2 cell division control protein 45 homolog [Acyrthosiphon pisum]
Chr01	61711223	synonymous_variant	Chr01.g01981	XP_003240168.1 SLIT and NTRK-like protein 5 [Acyrthosiphon pisum]
Chr01	61711232	synonymous_variant	Chr01.g01981	XP_003240168.1 SLIT and NTRK-like protein 5 [Acyrthosiphon pisum]
Chr01	61714874	intron_variant	Chr01.g01981	XP_003240168.1 SLIT and NTRK-like protein 5 [Acyrthosiphon pisum]
Chr01	61716010	intron_variant	Chr01.g01981	XP_003240168.1 SLIT and NTRK-like protein 5 [Acyrthosiphon pisum]
Chr01	61716657	intron_variant	Chr01.g01981	XP_003240168.1 SLIT and NTRK-like protein 5 [Acyrthosiphon pisum]
Chr01	61718427	intron_variant	Chr01.g01981	XP_003240168.1 SLIT and NTRK-like protein 5 [Acyrthosiphon pisum]
Chr01	61724704	intron_variant	Chr01.g01981	XP_003240168.1 SLIT and NTRK-like protein 5 [Acyrthosiphon pisum]
Chr01	61725729	intron_variant	Chr01.g01981	XP_003240168.1 SLIT and NTRK-like protein 5 [Acyrthosiphon pisum]
Chr01	62402226	synonymous_variant	Chr01.g01987	APB03428.1 odorant-binding protein 5 [Sitobion avenae]
Chr01	62412093	intron_variant	Chr01.g01987	APB03428.1 odorant-binding protein 5 [Sitobion avenae]
Chr01	62928199	intergenic_region	Chr01.g01994-Chr01.g01995	XP_001948721.1 T-complex protein 1 subunit beta [Acyrthosiphon pisum]
Chr01	62947297	intron_variant	Chr01.g01995	XP_003244554.1 protein FAM3C-like [Acyrthosiphon pisum]
Chr01	62978902	intron_variant	Chr01.g01997	XP_001945295.1 protein Wnt-1 [Acyrthosiphon pisum]
Chr01	63132970	intron_variant	Chr01.g02000	XP_001945091.2 neither inactivation nor afterpotential protein C [Acyrthosiphon pisum]
Chr01	63415217	intron_variant	Chr01.g02004	XP_022171902.1 Down syndrome cell adhesion molecule-like protein Dscam2 isoform X2 [Myzus persicae]
Chr01	63526063	intron_variant	Chr01.g02004	XP_022171902.1 Down syndrome cell adhesion molecule-like protein Dscam2 isoform X2 [Myzus persicae]
Chr01	63597682	intron_variant	Chr01.g02004	XP_022171902.1 Down syndrome cell adhesion molecule-like protein Dscam2 isoform X2 [Myzus persicae]
Chr01	63598425	intron_variant	Chr01.g02004	XP_022171902.1 Down syndrome cell adhesion molecule-like protein Dscam2 isoform X2 [Myzus persicae]
Chr01	63598722	intron_variant	Chr01.g02004	XP_022171902.1 Down syndrome cell adhesion molecule-like protein Dscam2 isoform X2 [Myzus persicae]
Chr01	63616711	intron_variant	Chr01.g02004	XP_022171902.1 Down syndrome cell adhesion molecule-like protein Dscam2 isoform X2 [Myzus persicae]
Chr01	63619604	intron_variant	Chr01.g02004	XP_022171902.1 Down syndrome cell adhesion molecule-like protein Dscam2 isoform X2 [Myzus persicae]
Chr01	63631124	intron_variant	Chr01.g02004	XP_022171902.1 Down syndrome cell adhesion molecule-like protein Dscam2 isoform X2 [Myzus persicae]
Chr01	63631632	intron_variant	Chr01.g02004	XP_022171902.1 Down syndrome cell adhesion molecule-like protein Dscam2 isoform X2 [Myzus persicae]
Chr01	63631788	intron_variant	Chr01.g02004	XP_022171902.1 Down syndrome cell adhesion molecule-like protein Dscam2 isoform X2 [Myzus persicae]
Chr01	63638872	intron_variant	Chr01.g02004
Chr01	63647896	intron_variant	Chr01.g02004	XP_022171902.1 Down syndrome cell adhesion molecule-like protein Dscam2 isoform X2 [Myzus persicae]
Chr01	63667325	intron_variant	Chr01.g02004	XP_022171902.1 Down syndrome cell adhesion molecule-like protein Dscam2 isoform X2 [Myzus persicae]
Chr01	63667815	intron_variant	Chr01.g02004	XP_022171902.1 Down syndrome cell adhesion molecule-like protein Dscam2 isoform X2 [Myzus persicae]
Chr01	63679164	intron_variant	Chr01.g02004	XP_022171902.1 Down syndrome cell adhesion molecule-like protein Dscam2 isoform X2 [Myzus persicae]
Chr01	63679595	intron_variant	Chr01.g02004	XP_022171902.1 Down syndrome cell adhesion molecule-like protein Dscam2 isoform X2 [Myzus persicae]
Chr01	63683528	intron_variant	Chr01.g02004	XP_022171902.1 Down syndrome cell adhesion molecule-like protein Dscam2 isoform X2 [Myzus persicae]
Chr01	63683704	intron_variant	Chr01.g02004	XP_022171902.1 Down syndrome cell adhesion molecule-like protein Dscam2 isoform X2 [Myzus persicae]
Chr01	63683762	intron_variant	Chr01.g02004	XP_022171902.1 Down syndrome cell adhesion molecule-like protein Dscam2 isoform X2 [Myzus persicae]
Chr01	63698362	intron_variant	Chr01.g02004	XP_022171902.1 Down syndrome cell adhesion molecule-like protein Dscam2 isoform X2 [Myzus persicae]
Chr01	63709645	intron_variant	Chr01.g02004	XP_022171902.1 Down syndrome cell adhesion molecule-like protein Dscam2 isoform X2 [Myzus persicae]
Chr01	63757830	intergenic_region	Chr01.g02004-Chr01.g02006	XP_022171902.1 Down syndrome cell adhesion molecule-like protein Dscam2 isoform X2 [Myzus persicae]
Chr01	63811335	intron_variant	Chr01.g02006	XP_022171945.1 gamma-butyrobetaine dioxygenase-like [Myzus persicae]
Chr01	63877985	missense_variant	Chr01.g02007	XP_016657848.1 uncharacterized protein LOC100575220 isoform X1 [Acyrthosiphon pisum]
Chr01	63878682	missense_variant	Chr01.g02007	XP_016657848.1 uncharacterized protein LOC100575220 isoform X1 [Acyrthosiphon pisum]
Chr01	63879190	synonymous_variant	Chr01.g02007	XP_016657848.1 uncharacterized protein LOC100575220 isoform X1 [Acyrthosiphon pisum]
Chr01	63934765	synonymous_variant	Chr01.g02011	KAE9543891.1 hypothetical protein AGLY_001869 [Aphis glycines]
Chr01	64022072	intron_variant	Chr01.g02014	XP_008187471.2 contactin [Acyrthosiphon pisum]
Chr01	64083541	intergenic_region	Chr01.g02016-Chr01.g02017	XP_015373445.1 PREDICTED: uncharacterized protein LOC107168493 [Diuraphis noxia]
Chr01	64085493	intergenic_region	Chr01.g02016-Chr01.g02017	NP_001155756.1 cyclin D2-like [Acyrthosiphon pisum]
Chr01	64134745	intergenic_region	Chr01.g02020-Chr01.g02021
Chr01	64241473	5_prime_UTR_variant	Chr01.g02025	XP_008180219.1 pleckstrin homology domain-containing family M member 1 isoform X1 [Acyrthosiphon pisum]
Chr01	64436703	intergenic_region	Chr01.g02031-Chr01.g02032	XP_003242590.1 phospholipase D C [Acyrthosiphon pisum]
Chr01	64437559	intergenic_region	Chr01.g02031-Chr01.g02032	XP_003242590.1 phospholipase D C [Acyrthosiphon pisum]
Chr01	64467973	intron_variant	Chr01.g02032	XP_001952621.2 flocculation protein FLO11 [Acyrthosiphon pisum]
Chr01	64504694	missense_variant	Chr01.g02034	XP_022171913.1 uncharacterized protein LOC111034832 [Myzus persicae]
Chr01	64557799	synonymous_variant	Chr01.g02034	XP_022171913.1 uncharacterized protein LOC111034832 [Myzus persicae]
Chr01	64635903	intergenic_region	Chr01.g02041-Chr01.g02042	XP_003241450.1 ring canal kelch homolog isoform X1 [Acyrthosiphon pisum]
Chr01	64636591	intergenic_region	Chr01.g02041-Chr01.g02042	XP_003241450.1 ring canal kelch homolog isoform X1 [Acyrthosiphon pisum]
Chr01	64637136	intergenic_region	Chr01.g02041-Chr01.g02042	XP_003241450.1 ring canal kelch homolog isoform X1 [Acyrthosiphon pisum]
Chr01	64667059	missense_variant	Chr01.g02042	XP_029344810.1 lysine-specific demethylase 3A isoform X1 [Acyrthosiphon pisum]
Chr01	64846537	intergenic_region	Chr01.g02043-Chr01.g02044	XP_001943767.1 histone acetyltransferase type B catalytic subunit [Acyrthosiphon pisum]
Chr01	64855266	5_prime_UTR_variant	Chr01.g02045	XP_008186594.1 uncharacterized protein LOC100161590 isoform X1 [Acyrthosiphon pisum]
Chr01	65207736	intergenic_region	Chr01.g02053-Chr01.g02054	XP_025194179.1 LOW QUALITY PROTEIN: uncharacterized protein LOC112593823 [Melanaphis sacchari]
Chr01	65210295	intergenic_region	Chr01.g02053-Chr01.g02054	XP_025194179.1 LOW QUALITY PROTEIN: uncharacterized protein LOC112593823 [Melanaphis sacchari]
Chr01	65508591	intergenic_region	Chr01.g02060-Chr01.g02061	XP_001948878.2 peroxisome biogenesis factor 1 [Acyrthosiphon pisum]
Chr01	65532765	intergenic_region	Chr01.g02061-Chr01.g02062	XP_029344776.1 lanC-like protein 2 [Acyrthosiphon pisum]
Chr01	65672880	intron_variant	Chr01.g02063	XP_029344759.1 protein alan shepard isoform X1 [Acyrthosiphon pisum]
Chr01	65673063	intron_variant	Chr01.g02063	XP_029344759.1 protein alan shepard isoform X1 [Acyrthosiphon pisum]
Chr01	65702695	intron_variant	Chr01.g02063	XP_029344759.1 protein alan shepard isoform X1 [Acyrthosiphon pisum]
Chr01	65726807	intron_variant	Chr01.g02063	XP_029344759.1 protein alan shepard isoform X1 [Acyrthosiphon pisum]
Chr01	65767433	intron_variant	Chr01.g02063	XP_029344759.1 protein alan shepard isoform X1 [Acyrthosiphon pisum]
Chr01	65768949	intron_variant	Chr01.g02063	XP_029344759.1 protein alan shepard isoform X1 [Acyrthosiphon pisum]
Chr01	65775353	intron_variant	Chr01.g02063	XP_029344759.1 protein alan shepard isoform X1 [Acyrthosiphon pisum]
Chr01	65795932	intergenic_region	Chr01.g02065-Chr01.g02066
Chr01	66009730	synonymous_variant	Chr01.g02076	XP_001947571.1 glycine-rich cell wall structural protein-like [Acyrthosiphon pisum]
Chr01	66142160	intergenic_region	Chr01.g02081-Chr01.g02082	XP_001944145.2 protein FAN isoform X1 [Acyrthosiphon pisum]
Chr01	66142512	intergenic_region	Chr01.g02081-Chr01.g02082	XP_001944145.2 protein FAN isoform X1 [Acyrthosiphon pisum]
Chr01	66163423	missense_variant	Chr01.g02082	XP_015363445.1 PREDICTED: AT-rich interactive domain-containing protein 4A-like isoform X1 [Diuraphis noxia]
Chr01	66187974	3_prime_UTR_variant	Chr01.g02084	XP_001946018.2 acidic fibroblast growth factor intracellular-binding protein [Acyrthosiphon pisum]
Chr01	66193013	synonymous_variant	Chr01.g02085	XP_008184572.1 erbin [Acyrthosiphon pisum]
Chr01	66567241	3_prime_UTR_variant	Chr01.g02102	XP_001946957.2 arrestin homolog [Acyrthosiphon pisum]
Chr01	66567347	3_prime_UTR_variant	Chr01.g02102	XP_001946957.2 arrestin homolog [Acyrthosiphon pisum]
Chr01	66567393	3_prime_UTR_variant	Chr01.g02102	XP_001946957.2 arrestin homolog [Acyrthosiphon pisum]
Chr01	66711235	intron_variant	Chr01.g02103	XP_029341094.1 uncharacterized protein LOC100571316 [Acyrthosiphon pisum]
Chr01	66716644	intron_variant	Chr01.g02103	XP_029341094.1 uncharacterized protein LOC100571316 [Acyrthosiphon pisum]
Chr01	66722567	intron_variant	Chr01.g02103	XP_029341094.1 uncharacterized protein LOC100571316 [Acyrthosiphon pisum]
Chr01	66853267	intergenic_region	Chr01.g02110-Chr01.g02111	XP_025421261.1 uncharacterized protein LOC112691309 [Sipha flava]
Chr01	66856218	intergenic_region	Chr01.g02110-Chr01.g02111	XP_025421261.1 uncharacterized protein LOC112691309 [Sipha flava]
Chr01	66856295	intergenic_region	Chr01.g02110-Chr01.g02111	XP_025421261.1 uncharacterized protein LOC112691309 [Sipha flava]
Chr01	67124408	5_prime_UTR_variant	Chr01.g02120	NP_001155819.1 uncharacterized protein LOC100169253 [Acyrthosiphon pisum]
Chr01	67127470	synonymous_variant	Chr01.g02121	XP_001949439.2 N-terminal kinase-like protein isoform X1 [Acyrthosiphon pisum]
Chr01	67190753	missense_variant	Chr01.g02125	XP_008181887.1 protein PAT1 homolog 1 isoform X3 [Acyrthosiphon pisum]
Chr01	67264792	intron_variant	Chr01.g02128	XP_003240425.1 myosin-VIIa isoform X1 [Acyrthosiphon pisum]
Chr01	67283450	intron_variant	Chr01.g02128	XP_003240425.1 myosin-VIIa isoform X1 [Acyrthosiphon pisum]
Chr01	67296388	intron_variant	Chr01.g02128	XP_003240425.1 myosin-VIIa isoform X1 [Acyrthosiphon pisum]
Chr01	67366280	intron_variant	Chr01.g02128	XP_022160102.1 zinc finger MYM-type protein 1-like, partial [Myzus persicae]
Chr01	67438944	missense_variant	Chr01.g02133	XP_003246665.1 zinc finger protein 271-like isoform X1 [Acyrthosiphon pisum]
Chr01	67477499	intergenic_region	Chr01.g02135-Chr01.g02136	XP_029344585.1 uncharacterized protein LOC100166940 [Acyrthosiphon pisum]
Chr01	67500823	missense_variant	Chr01.g02136	XP_029344585.1 uncharacterized protein LOC100166940 [Acyrthosiphon pisum]
Chr01	67555880	intergenic_region	Chr01.g02136-Chr01.g02137	XP_029344585.1 uncharacterized protein LOC100166940 [Acyrthosiphon pisum]
Chr01	67566735	intergenic_region	Chr01.g02136-Chr01.g02137	XP_029344585.1 uncharacterized protein LOC100166940 [Acyrthosiphon pisum]
Chr01	67577025	intergenic_region	Chr01.g02136-Chr01.g02137	XP_029344585.1 uncharacterized protein LOC100166940 [Acyrthosiphon pisum]
Chr01	67577057	intergenic_region	Chr01.g02136-Chr01.g02137	XP_029344585.1 uncharacterized protein LOC100166940 [Acyrthosiphon pisum]
Chr01	67577062	intergenic_region	Chr01.g02136-Chr01.g02137	XP_029344585.1 uncharacterized protein LOC100166940 [Acyrthosiphon pisum]
Chr01	67578317	intergenic_region	Chr01.g02136-Chr01.g02137	XP_029344585.1 uncharacterized protein LOC100166940 [Acyrthosiphon pisum]
Chr01	67579570	intergenic_region	Chr01.g02136-Chr01.g02137	XP_029344585.1 uncharacterized protein LOC100166940 [Acyrthosiphon pisum]
Chr01	67579639	intergenic_region	Chr01.g02136-Chr01.g02137	XP_029344585.1 uncharacterized protein LOC100166940 [Acyrthosiphon pisum]
Chr01	67590564	intergenic_region	Chr01.g02136-Chr01.g02137	XP_029344585.1 uncharacterized protein LOC100166940 [Acyrthosiphon pisum]
Chr01	67592091	intergenic_region	Chr01.g02136-Chr01.g02137	XP_029344585.1 uncharacterized protein LOC100166940 [Acyrthosiphon pisum]
Chr01	67645294	intergenic_region	Chr01.g02136-Chr01.g02137	XP_029344585.1 uncharacterized protein LOC100166940 [Acyrthosiphon pisum]
Chr01	68090494	intergenic_region	Chr01.g02154-Chr01.g02155	XP_029344513.1 uncharacterized protein LOC100569162 isoform X1 [Acyrthosiphon pisum]
Chr01	68136044	intergenic_region	Chr01.g02157-Chr01.g02158
Chr01	68329684	5_prime_UTR_variant	Chr01.g02167	XP_022163252.1 uncharacterized protein LOC111028798 [Myzus persicae]
Chr01	68431645	synonymous_variant	Chr01.g02172	XP_001943509.2 uncharacterized protein LOC100162875 [Acyrthosiphon pisum]
Chr01	68431901	missense_variant	Chr01.g02172	XP_001943509.2 uncharacterized protein LOC100162875 [Acyrthosiphon pisum]
Chr01	68432093	intergenic_region	Chr01.g02172-Chr01.g02173	XP_001943509.2 uncharacterized protein LOC100162875 [Acyrthosiphon pisum]
Chr01	68498686	intergenic_region	Chr01.g02176-Chr01.g02177	XP_022162888.1 serine proteinase stubble-like isoform X1 [Myzus persicae]
Chr01	68566111	intergenic_region	Chr01.g02183-Chr01.g02184
Chr01	68613363	3_prime_UTR_variant	Chr01.g02190	XP_001942717.1 CWF19-like protein 1 [Acyrthosiphon pisum]
Chr01	68615918	missense_variant	Chr01.g02191	XP_001942777.2 alpha-ketoglutarate-dependent dioxygenase alkB homolog 7, mitochondrial [Acyrthosiphon pisum]
Chr01	68634176	intergenic_region	Chr01.g02193-Chr01.g02194	XP_016656321.1 3'(2'),5'-bisphosphate nucleotidase 1-like isoform X1 [Acyrthosiphon pisum]
Chr01	68635587	intergenic_region	Chr01.g02193-Chr01.g02194	XP_016656321.1 3'(2'),5'-bisphosphate nucleotidase 1-like isoform X1 [Acyrthosiphon pisum]
Chr01	68635633	intergenic_region	Chr01.g02193-Chr01.g02194	XP_016656321.1 3'(2'),5'-bisphosphate nucleotidase 1-like isoform X1 [Acyrthosiphon pisum]
Chr01	68635678	intergenic_region	Chr01.g02193-Chr01.g02194	XP_016656321.1 3'(2'),5'-bisphosphate nucleotidase 1-like isoform X1 [Acyrthosiphon pisum]
Chr01	68653670	intron_variant	Chr01.g02195	XP_022181116.1 serine/threonine-protein phosphatase 2A 56 kDa regulatory subunit epsilon isoform [Myzus persicae]
Chr01	68654031	intron_variant	Chr01.g02195	XP_022181116.1 serine/threonine-protein phosphatase 2A 56 kDa regulatory subunit epsilon isoform [Myzus persicae]
Chr01	68670171	intergenic_region	Chr01.g02195-Chr01.g02196	XP_022181116.1 serine/threonine-protein phosphatase 2A 56 kDa regulatory subunit epsilon isoform [Myzus persicae]
Chr01	68670999	intergenic_region	Chr01.g02195-Chr01.g02196	XP_022181116.1 serine/threonine-protein phosphatase 2A 56 kDa regulatory subunit epsilon isoform [Myzus persicae]
Chr01	68823051	intergenic_region	Chr01.g02198-Chr01.g02199	XP_001943433.1 thioredoxin-like protein 1 [Acyrthosiphon pisum]
Chr01	68939263	missense_variant	Chr01.g02201	XP_022165342.1 proton-coupled amino acid transporter-like protein pathetic [Myzus persicae]
Chr01	68939870	3_prime_UTR_variant	Chr01.g02201	XP_022165342.1 proton-coupled amino acid transporter-like protein pathetic [Myzus persicae]
Chr01	68980928	intron_variant	Chr01.g02203	NP_001233233.1 amino acid transporter [Acyrthosiphon pisum]
Chr01	68993518	synonymous_variant	Chr01.g02204	XP_003245207.1 uncharacterized protein LOC100574593 [Acyrthosiphon pisum]
Chr01	68993860	synonymous_variant	Chr01.g02204	XP_003245207.1 uncharacterized protein LOC100574593 [Acyrthosiphon pisum]
Chr01	68998443	intron_variant	Chr01.g02204	XP_003245207.1 uncharacterized protein LOC100574593 [Acyrthosiphon pisum]
Chr01	69002297	intergenic_region	Chr01.g02204-Chr01.g02205	XP_003245207.1 uncharacterized protein LOC100574593 [Acyrthosiphon pisum]
Chr01	69003024	intergenic_region	Chr01.g02204-Chr01.g02205	XP_003245207.1 uncharacterized protein LOC100574593 [Acyrthosiphon pisum]
Chr01	69003091	intergenic_region	Chr01.g02204-Chr01.g02205	XP_003245207.1 uncharacterized protein LOC100574593 [Acyrthosiphon pisum]
Chr01	69024273	intergenic_region	Chr01.g02205-Chr01.g02206
Chr01	69027598	synonymous_variant	Chr01.g02206
Chr01	69190672	intergenic_region	Chr01.g02214-Chr01.g02215	XP_022165325.1 delta(24)-sterol reductase-like isoform X1 [Myzus persicae]
Chr01	69226342	intron_variant	Chr01.g02216	XP_001945319.1 DNA polymerase alpha subunit B [Acyrthosiphon pisum]
Chr01	69235142	intergenic_region	Chr01.g02216-Chr01.g02217	XP_001945319.1 DNA polymerase alpha subunit B [Acyrthosiphon pisum]
Chr01	69235312	intergenic_region	Chr01.g02216-Chr01.g02217	XP_001945319.1 DNA polymerase alpha subunit B [Acyrthosiphon pisum]
Chr01	69235421	intergenic_region	Chr01.g02216-Chr01.g02217	XP_001945319.1 DNA polymerase alpha subunit B [Acyrthosiphon pisum]
Chr01	69317691	intergenic_region	Chr01.g02219-Chr01.g02220	XP_008178636.1 uncharacterized protein LOC100572328 isoform X1 [Acyrthosiphon pisum]
Chr01	69321287	intron_variant	Chr01.g02220	XP_008178636.1 uncharacterized protein LOC100572328 isoform X1 [Acyrthosiphon pisum]
Chr01	69324941	synonymous_variant	Chr01.g02220	XP_008178636.1 uncharacterized protein LOC100572328 isoform X1 [Acyrthosiphon pisum]
Chr01	69723993	intergenic_region	Chr01.g02229-Chr01.g02230	XP_001951491.1 eukaryotic initiation factor 4A-III [Acyrthosiphon pisum]
Chr01	69750867	intergenic_region	Chr01.g02232-Chr01.g02233	XP_003244510.1 uncharacterized protein LOC100573840 [Acyrthosiphon pisum]
Chr01	69753426	intergenic_region	Chr01.g02232-Chr01.g02233	XP_003244510.1 uncharacterized protein LOC100573840 [Acyrthosiphon pisum]
Chr01	69765183	synonymous_variant	Chr01.g02233	XP_003244509.1 trichohyalin [Acyrthosiphon pisum]
Chr01	69774798	missense_variant	Chr01.g02234	XP_008183066.1 uncharacterized protein LOC100169150 [Acyrthosiphon pisum]
Chr01	69775288	synonymous_variant	Chr01.g02234	XP_008183066.1 uncharacterized protein LOC100169150 [Acyrthosiphon pisum]
Chr01	69791756	intergenic_region	Chr01.g02234-Chr01.g02235	XP_001948999.2 uncharacterized protein LOC100168575 [Acyrthosiphon pisum]
Chr01	69797204	synonymous_variant	Chr01.g02235	XP_001948999.2 uncharacterized protein LOC100168575 [Acyrthosiphon pisum]
Chr01	69800904	intron_variant	Chr01.g02235	XP_001948999.2 uncharacterized protein LOC100168575 [Acyrthosiphon pisum]
Chr01	69832983	synonymous_variant	Chr01.g02236	XP_001946705.2 AT-rich interactive domain-containing protein 1A [Acyrthosiphon pisum]
Chr01	69863411	synonymous_variant	Chr01.g02237	XP_003245575.1 uncharacterized protein LOC100574823 [Acyrthosiphon pisum]
Chr01	69864159	missense_variant	Chr01.g02237	XP_003245575.1 uncharacterized protein LOC100574823 [Acyrthosiphon pisum]
Chr01	70201512	intergenic_region	Chr01.g02247-Chr01.g02248	XP_029344276.1 transcription factor collier-like isoform X1 [Acyrthosiphon pisum]
Chr01	70238340	intergenic_region	Chr01.g02249-Chr01.g02250
Chr01	70238698	intergenic_region	Chr01.g02249-Chr01.g02250
Chr01	70241323	intergenic_region	Chr01.g02249-Chr01.g02250
Chr01	70241393	intergenic_region	Chr01.g02249-Chr01.g02250
Chr01	70241790	intergenic_region	Chr01.g02249-Chr01.g02250
Chr01	70250343	intergenic_region	Chr01.g02249-Chr01.g02250
Chr01	70259371	intergenic_region	Chr01.g02249-Chr01.g02250
Chr01	70293065	intron_variant	Chr01.g02250	VVC26667.1 Transcription factor COE, DNA-binding domain,IPT domain,Transcription factor COE, conserved [Cinara cedri]
Chr01	70294983	synonymous_variant	Chr01.g02250	VVC26667.1 Transcription factor COE, DNA-binding domain,IPT domain,Transcription factor COE, conserved [Cinara cedri]
Chr01	70360234	intron_variant	Chr01.g02251	XP_001945100.2 probable cytochrome P450 6a14 [Acyrthosiphon pisum]
Chr01	70720879	intergenic_region	Chr01.g02261-Chr01.g02262	XP_001946199.1 zinc finger protein ZPR1 [Acyrthosiphon pisum]
Chr01	71100863	intron_variant	Chr01.g02287	XP_001944975.2 SRSF protein kinase 3 isoform X1 [Acyrthosiphon pisum]
Chr01	71117529	3_prime_UTR_variant	Chr01.g02287	XP_001944975.2 SRSF protein kinase 3 isoform X1 [Acyrthosiphon pisum]
Chr01	71127369	intron_variant	Chr01.g02289
Chr01	71128108	intron_variant	Chr01.g02289
Chr01	71133857	intron_variant	Chr01.g02289	XP_001944866.2 uncharacterized protein LOC100167153 [Acyrthosiphon pisum]
Chr01	71133858	intron_variant	Chr01.g02289	XP_001944866.2 uncharacterized protein LOC100167153 [Acyrthosiphon pisum]
Chr01	71136151	intron_variant	Chr01.g02289	XP_016663109.1 uncharacterized protein LOC100169197 [Acyrthosiphon pisum]
Chr01	71141538	missense_variant	Chr01.g02290	XP_016663109.1 uncharacterized protein LOC100169197 [Acyrthosiphon pisum]
Chr01	71263367	intergenic_region	Chr01.g02293-Chr01.g02294	XP_008185946.1 histone deacetylase 4 isoform X2 [Acyrthosiphon pisum]
Chr01	71347538	intergenic_region	Chr01.g02297-Chr01.g02298	XP_001945098.2 cell growth regulator with RING finger domain protein 1 isoform X1 [Acyrthosiphon pisum]
Chr01	71367031	intron_variant	Chr01.g02298	XP_001945098.2 cell growth regulator with RING finger domain protein 1 isoform X1 [Acyrthosiphon pisum]
Chr01	71444383	5_prime_UTR_variant	Chr01.g02302	XP_001944974.2 arginine/serine-rich protein PNISR [Acyrthosiphon pisum]
Chr01	71450182	intergenic_region	Chr01.g02303-Chr01.g02304	XP_008185932.1 uncharacterized protein LOC100166975 [Acyrthosiphon pisum]
Chr01	71456715	synonymous_variant	Chr01.g02304	XP_008185932.1 uncharacterized protein LOC100166975 [Acyrthosiphon pisum]
Chr01	71459309	intergenic_region	Chr01.g02304-Chr01.g02305	XP_008185932.1 uncharacterized protein LOC100166975 [Acyrthosiphon pisum]
Chr01	71633819	intergenic_region	Chr01.g02309-Chr01.g02310	XP_029344062.1 uncharacterized protein LOC100572033 [Acyrthosiphon pisum]
Chr01	71716036	intron_variant	Chr01.g02310	XP_029344062.1 uncharacterized protein LOC100572033 [Acyrthosiphon pisum]
Chr01	71762905	intron_variant	Chr01.g02310	XP_029344062.1 uncharacterized protein LOC100572033 [Acyrthosiphon pisum]
Chr01	71763122	intron_variant	Chr01.g02310	XP_029344062.1 uncharacterized protein LOC100572033 [Acyrthosiphon pisum]
Chr01	71797084	intron_variant	Chr01.g02310	XP_029344062.1 uncharacterized protein LOC100572033 [Acyrthosiphon pisum]
Chr01	71813893	intron_variant	Chr01.g02310	XP_029344062.1 uncharacterized protein LOC100572033 [Acyrthosiphon pisum]
Chr01	71813914	intron_variant	Chr01.g02310	XP_029344062.1 uncharacterized protein LOC100572033 [Acyrthosiphon pisum]
Chr01	71815199	intron_variant	Chr01.g02310	XP_029344062.1 uncharacterized protein LOC100572033 [Acyrthosiphon pisum]
Chr01	71829858	intron_variant	Chr01.g02310	XP_029344062.1 uncharacterized protein LOC100572033 [Acyrthosiphon pisum]
Chr01	71833442	intron_variant	Chr01.g02310	XP_029344062.1 uncharacterized protein LOC100572033 [Acyrthosiphon pisum]
Chr01	71835405	intron_variant	Chr01.g02310	XP_029344062.1 uncharacterized protein LOC100572033 [Acyrthosiphon pisum]
Chr01	71835875	intron_variant	Chr01.g02310	XP_029344062.1 uncharacterized protein LOC100572033 [Acyrthosiphon pisum]
Chr01	71836078	intron_variant	Chr01.g02310	XP_029344062.1 uncharacterized protein LOC100572033 [Acyrthosiphon pisum]
Chr01	71856544	intron_variant	Chr01.g02310	XP_029344062.1 uncharacterized protein LOC100572033 [Acyrthosiphon pisum]
Chr01	71936295	intron_variant	Chr01.g02310	XP_029344062.1 uncharacterized protein LOC100572033 [Acyrthosiphon pisum]
Chr01	72091225	5_prime_UTR_variant	Chr01.g02311	XP_029344047.1 monoacylglycerol lipase ABHD12 isoform X1 [Acyrthosiphon pisum]
Chr01	72125398	intron_variant	Chr01.g02315	XP_008178970.2 neurotrimin isoform X1 [Acyrthosiphon pisum]
Chr01	72160421	intron_variant	Chr01.g02315	XP_008178970.2 neurotrimin isoform X1 [Acyrthosiphon pisum]
Chr01	72160423	intron_variant	Chr01.g02315	XP_008178970.2 neurotrimin isoform X1 [Acyrthosiphon pisum]
Chr01	72162628	intron_variant	Chr01.g02315	XP_008178970.2 neurotrimin isoform X1 [Acyrthosiphon pisum]
Chr01	72163413	intron_variant	Chr01.g02315	XP_008178970.2 neurotrimin isoform X1 [Acyrthosiphon pisum]
Chr01	72166712	intron_variant	Chr01.g02315	XP_008178970.2 neurotrimin isoform X1 [Acyrthosiphon pisum]
Chr01	72167737	intron_variant	Chr01.g02315	XP_008178970.2 neurotrimin isoform X1 [Acyrthosiphon pisum]
Chr01	72170009	intron_variant	Chr01.g02315
Chr01	72170693	intron_variant	Chr01.g02315
Chr01	72172180	intron_variant	Chr01.g02315
Chr01	72198692	intron_variant	Chr01.g02315	XP_008178970.2 neurotrimin isoform X1 [Acyrthosiphon pisum]
Chr01	72200001	intron_variant	Chr01.g02315	XP_008178970.2 neurotrimin isoform X1 [Acyrthosiphon pisum]
Chr01	72200194	intron_variant	Chr01.g02315	XP_008178970.2 neurotrimin isoform X1 [Acyrthosiphon pisum]
Chr01	72214066	intron_variant	Chr01.g02315	XP_008178970.2 neurotrimin isoform X1 [Acyrthosiphon pisum]
Chr01	72220476	intron_variant	Chr01.g02315	XP_008178970.2 neurotrimin isoform X1 [Acyrthosiphon pisum]
Chr01	72224552	intron_variant	Chr01.g02315	XP_008178970.2 neurotrimin isoform X1 [Acyrthosiphon pisum]
Chr01	72226748	intron_variant	Chr01.g02315	XP_008178970.2 neurotrimin isoform X1 [Acyrthosiphon pisum]
Chr01	72236537	intron_variant	Chr01.g02315
Chr01	72237871	intron_variant	Chr01.g02315
Chr01	72257868	intron_variant	Chr01.g02315	XP_008178970.2 neurotrimin isoform X1 [Acyrthosiphon pisum]
Chr01	72263872	intron_variant	Chr01.g02315	XP_008178970.2 neurotrimin isoform X1 [Acyrthosiphon pisum]
Chr01	72270103	intron_variant	Chr01.g02315
Chr01	72277423	intron_variant	Chr01.g02315
Chr01	72280530	intron_variant	Chr01.g02315	XP_008178970.2 neurotrimin isoform X1 [Acyrthosiphon pisum]
Chr01	72281161	intron_variant	Chr01.g02315	XP_008178970.2 neurotrimin isoform X1 [Acyrthosiphon pisum]
Chr01	72281472	intron_variant	Chr01.g02315	XP_008178970.2 neurotrimin isoform X1 [Acyrthosiphon pisum]
Chr01	72298019	intron_variant	Chr01.g02315	XP_008178970.2 neurotrimin isoform X1 [Acyrthosiphon pisum]
Chr01	72301766	intron_variant	Chr01.g02315	XP_008178970.2 neurotrimin isoform X1 [Acyrthosiphon pisum]
Chr01	72302396	intron_variant	Chr01.g02315	XP_008178970.2 neurotrimin isoform X1 [Acyrthosiphon pisum]
Chr01	72302812	intron_variant	Chr01.g02315	XP_008178970.2 neurotrimin isoform X1 [Acyrthosiphon pisum]
Chr01	72648065	3_prime_UTR_variant	Chr01.g02325	XP_008181080.1 uncharacterized protein LOC100164133 isoform X1 [Acyrthosiphon pisum]
Chr01	72649858	intergenic_region	Chr01.g02325-Chr01.g02326	XP_008181082.1 uncharacterized protein KIAA1841 homolog isoform X1 [Acyrthosiphon pisum]
Chr01	72961134	synonymous_variant	Chr01.g02337	XP_001949683.2 fatty acyl-CoA reductase 1 [Acyrthosiphon pisum]
Chr01	73042148	missense_variant	Chr01.g02339	XP_026817392.1 UV radiation resistance associated protein [Rhopalosiphum maidis]
Chr01	73047689	intergenic_region	Chr01.g02339-Chr01.g02340	XP_026817392.1 UV radiation resistance associated protein [Rhopalosiphum maidis]
Chr01	73252709	intergenic_region	Chr01.g02351-Chr01.g02352	XP_001945260.2 sphingomyelin phosphodiesterase 4 [Acyrthosiphon pisum]
Chr01	73295992	synonymous_variant	Chr01.g02353	XP_001949550.1 alpha-tocopherol transfer protein [Acyrthosiphon pisum]
Chr01	73333089	intron_variant	Chr01.g02356	XP_008180926.2 uncharacterized protein LOC103308741 isoform X2 [Acyrthosiphon pisum]
Chr01	73334013	intron_variant	Chr01.g02356	XP_008180926.2 uncharacterized protein LOC103308741 isoform X2 [Acyrthosiphon pisum]
Chr01	73339412	intergenic_region	Chr01.g02356-Chr01.g02357	XP_008180926.2 uncharacterized protein LOC103308741 isoform X2 [Acyrthosiphon pisum]
Chr01	73353459	intron_variant	Chr01.g02357	XP_016658178.1 uncharacterized protein LOC100166395 isoform X1 [Acyrthosiphon pisum]
Chr01	73359572	intron_variant	Chr01.g02357	XP_016658178.1 uncharacterized protein LOC100166395 isoform X1 [Acyrthosiphon pisum]
Chr01	73359665	intron_variant	Chr01.g02357	XP_016658178.1 uncharacterized protein LOC100166395 isoform X1 [Acyrthosiphon pisum]
Chr01	73360199	intron_variant	Chr01.g02357	XP_016658178.1 uncharacterized protein LOC100166395 isoform X1 [Acyrthosiphon pisum]
Chr01	73361855	intergenic_region	Chr01.g02357-Chr01.g02358	XP_016658178.1 uncharacterized protein LOC100166395 isoform X1 [Acyrthosiphon pisum]
Chr01	73669794	synonymous_variant	Chr01.g02366	XP_022182670.1 uncharacterized protein LOC111042389 [Myzus persicae]
Chr01	73683750	missense_variant	Chr01.g02366	XP_022182670.1 uncharacterized protein LOC111042389 [Myzus persicae]
Chr01	73684582	intergenic_region	Chr01.g02366-Chr01.g02367
Chr01	73755381	intron_variant	Chr01.g02369	NP_001280298.1 uncharacterized protein LOC100161069 [Acyrthosiphon pisum]
Chr01	73777598	synonymous_variant	Chr01.g02370	XP_008186171.1 LOW QUALITY PROTEIN: laminin subunit beta-1 [Acyrthosiphon pisum]
Chr01	73779997	synonymous_variant	Chr01.g02370	XP_008186171.1 LOW QUALITY PROTEIN: laminin subunit beta-1 [Acyrthosiphon pisum]
Chr01	73792459	intron_variant	Chr01.g02370	XP_008186171.1 LOW QUALITY PROTEIN: laminin subunit beta-1 [Acyrthosiphon pisum]
Chr01	73836663	intron_variant	Chr01.g02372	NP_001156043.1 cytochrome c1-like [Acyrthosiphon pisum]
Chr01	73920090	intergenic_region	Chr01.g02373-Chr01.g02374	NP_001155760.1 cytochrome c1-like [Acyrthosiphon pisum]
Chr01	73936906	intergenic_region	Chr01.g02373-Chr01.g02374	NP_001155760.1 cytochrome c1-like [Acyrthosiphon pisum]
Chr01	73942909	intergenic_region	Chr01.g02373-Chr01.g02374	NP_001155760.1 cytochrome c1-like [Acyrthosiphon pisum]
Chr01	73990003	synonymous_variant	Chr01.g02374	XP_008184077.1 zinc finger protein ush, partial [Acyrthosiphon pisum]
Chr01	74440014	intergenic_region	Chr01.g02393-Chr01.g02394	XP_022175937.1 cytochrome P450 4C1-like [Myzus persicae]
Chr01	74440309	intergenic_region	Chr01.g02393-Chr01.g02394	XP_022175937.1 cytochrome P450 4C1-like [Myzus persicae]
Chr01	74457103	synonymous_variant	Chr01.g02394	XP_029343832.1 carbonic anhydrase-related protein 10 [Acyrthosiphon pisum]
Chr01	74465705	intron_variant	Chr01.g02394	XP_029343832.1 carbonic anhydrase-related protein 10 [Acyrthosiphon pisum]
Chr01	74622047	intergenic_region	Chr01.g02394-Chr01.g02395	XP_029343832.1 carbonic anhydrase-related protein 10 [Acyrthosiphon pisum]
Chr01	74622851	intergenic_region	Chr01.g02394-Chr01.g02395	XP_029343832.1 carbonic anhydrase-related protein 10 [Acyrthosiphon pisum]
Chr01	74623213	intergenic_region	Chr01.g02394-Chr01.g02395	XP_029343832.1 carbonic anhydrase-related protein 10 [Acyrthosiphon pisum]
Chr01	74629422	intergenic_region	Chr01.g02394-Chr01.g02395	XP_029343832.1 carbonic anhydrase-related protein 10 [Acyrthosiphon pisum]
Chr01	74681448	intergenic_region	Chr01.g02394-Chr01.g02395	XP_029343832.1 carbonic anhydrase-related protein 10 [Acyrthosiphon pisum]
Chr01	74681457	intergenic_region	Chr01.g02394-Chr01.g02395	XP_029343832.1 carbonic anhydrase-related protein 10 [Acyrthosiphon pisum]
Chr01	74683296	intergenic_region	Chr01.g02394-Chr01.g02395	XP_029343832.1 carbonic anhydrase-related protein 10 [Acyrthosiphon pisum]
Chr01	74817213	intron_variant	Chr01.g02398	XP_001946617.2 alpha-tocopherol transfer protein [Acyrthosiphon pisum]
Chr01	74903836	synonymous_variant	Chr01.g02400	XP_001947232.2 hemocyte protein-glutamine gamma-glutamyltransferase [Acyrthosiphon pisum]
Chr01	74923955	intron_variant	Chr01.g02401	XP_022172067.1 integrin alpha-PS1 [Myzus persicae]
Chr01	74959130	3_prime_UTR_variant	Chr01.g02404	XP_003246769.1 transmembrane emp24 domain-containing protein bai isoform X1 [Acyrthosiphon pisum]
Chr01	75074963	intergenic_region	Chr01.g02410-Chr01.g02411	XP_008183654.1 uncharacterized protein LOC100166397 isoform X2 [Acyrthosiphon pisum]
Chr01	75150627	intergenic_region	Chr01.g02414-Chr01.g02415	XP_022174108.1 bifunctional coenzyme A synthase-like [Myzus persicae]
Chr01	75426920	intergenic_region	Chr01.g02426-Chr01.g02427	XP_008180306.1 uncharacterized protein LOC100165413 isoform X1 [Acyrthosiphon pisum]
Chr01	75577839	intergenic_region	Chr01.g02429-Chr01.g02430	XP_003243994.1 homeobox protein six1 [Acyrthosiphon pisum]
Chr01	75595789	intergenic_region	Chr01.g02430-Chr01.g02431	XP_003243994.1 homeobox protein six1 [Acyrthosiphon pisum]
Chr01	75623339	intergenic_region	Chr01.g02430-Chr01.g02431	XP_003243994.1 homeobox protein six1 [Acyrthosiphon pisum]
Chr01	76114894	3_prime_UTR_variant	Chr01.g02448	XP_003247679.1 uncharacterized protein LOC100572193 [Acyrthosiphon pisum]
Chr01	76115449	intergenic_region	Chr01.g02448-Chr01.g02449	XP_003247679.1 uncharacterized protein LOC100572193 [Acyrthosiphon pisum]
Chr01	76115851	intergenic_region	Chr01.g02448-Chr01.g02449	XP_003247679.1 uncharacterized protein LOC100572193 [Acyrthosiphon pisum]
Chr01	76136070	intron_variant	Chr01.g02449	XP_001943361.1 dnaJ homolog subfamily C member 1 isoform X1 [Acyrthosiphon pisum]
Chr01	76200625	intergenic_region	Chr01.g02451-Chr01.g02452
Chr01	76201978	intergenic_region	Chr01.g02451-Chr01.g02452
Chr01	76304674	intergenic_region	Chr01.g02452-Chr01.g02453	XP_001948509.2 uncharacterized protein LOC100169054 isoform X1 [Acyrthosiphon pisum]
Chr01	76304990	intergenic_region	Chr01.g02452-Chr01.g02453	XP_001948509.2 uncharacterized protein LOC100169054 isoform X1 [Acyrthosiphon pisum]
Chr01	76381386	5_prime_UTR_variant	Chr01.g02453	XP_008186393.1 partitioning defective 3 homolog isoform X1 [Acyrthosiphon pisum]
Chr01	76405879	missense_variant	Chr01.g02453	XP_008186393.1 partitioning defective 3 homolog isoform X1 [Acyrthosiphon pisum]
Chr01	77268938	intergenic_region	Chr01.g02475-Chr01.g02476	KAE9526641.1 hypothetical protein AGLY_013289, partial [Aphis glycines]
Chr01	77678628	5_prime_UTR_variant	Chr01.g02496	XP_029343522.1 venom dipeptidyl peptidase 4 isoform X1 [Acyrthosiphon pisum]
Chr01	77696152	5_prime_UTR_variant	Chr01.g02496	XP_029343522.1 venom dipeptidyl peptidase 4 isoform X1 [Acyrthosiphon pisum]
Chr01	77786909	synonymous_variant	Chr01.g02498	XP_016663344.1 uncharacterized protein LOC100570826 [Acyrthosiphon pisum]
Chr01	77810100	synonymous_variant	Chr01.g02499	XP_001947417.2 protein MON2 homolog isoform X1 [Acyrthosiphon pisum]
Chr01	77810813	intron_variant	Chr01.g02499	XP_001947417.2 protein MON2 homolog isoform X1 [Acyrthosiphon pisum]
Chr01	77812463	synonymous_variant	Chr01.g02499	XP_001947417.2 protein MON2 homolog isoform X1 [Acyrthosiphon pisum]
Chr01	77825248	intergenic_region	Chr01.g02499-Chr01.g02500	XP_001947417.2 protein MON2 homolog isoform X1 [Acyrthosiphon pisum]
Chr01	77831930	intergenic_region	Chr01.g02499-Chr01.g02500	XP_001947417.2 protein MON2 homolog isoform X1 [Acyrthosiphon pisum]
Chr01	77874702	synonymous_variant	Chr01.g02500	XP_029343509.1 fatty acyl-CoA reductase 1 [Acyrthosiphon pisum]
Chr01	77969334	5_prime_UTR_variant	Chr01.g02502	XP_001949803.1 prostatic acid phosphatase isoform X2 [Acyrthosiphon pisum]
Chr01	77987920	intergenic_region	Chr01.g02502-Chr01.g02503	XP_001949803.1 prostatic acid phosphatase isoform X2 [Acyrthosiphon pisum]
Chr01	78014424	3_prime_UTR_variant	Chr01.g02503	XP_016662161.1 L-asparaginase [Acyrthosiphon pisum]
Chr01	78208147	missense_variant	Chr01.g02510	XP_001950680.1 facilitated trehalose transporter Tret1 [Acyrthosiphon pisum]
Chr01	78290338	missense_variant	Chr01.g02514	XP_029343468.1 facilitated trehalose transporter Tret1 isoform X2 [Acyrthosiphon pisum]
Chr01	78357752	intron_variant	Chr01.g02517	XP_003245535.1 uncharacterized protein LOC100574822 [Acyrthosiphon pisum]
Chr01	78683259	3_prime_UTR_variant	Chr01.g02534	XP_001947674.2 LOW QUALITY PROTEIN: adipocyte plasma membrane-associated protein [Acyrthosiphon pisum]
Chr01	78768937	intergenic_region	Chr01.g02535-Chr01.g02536	XP_003244950.3 uncharacterized protein LOC100574916 [Acyrthosiphon pisum]
Chr01	79007497	synonymous_variant	Chr01.g02540	XP_001952143.2 uncharacterized protein LOC100163822 [Acyrthosiphon pisum]
Chr01	79077453	intron_variant	Chr01.g02545	XP_003244940.1 battenin [Acyrthosiphon pisum]
Chr01	79077615	intron_variant	Chr01.g02545	XP_003244940.1 battenin [Acyrthosiphon pisum]
Chr01	79088152	intergenic_region	Chr01.g02545-Chr01.g02546	XP_003244940.1 battenin [Acyrthosiphon pisum]
Chr01	79088262	3_prime_UTR_variant	Chr01.g02546	XP_001949596.2 WD repeat-containing protein 20 [Acyrthosiphon pisum]
Chr01	79088638	3_prime_UTR_variant	Chr01.g02546	XP_001949596.2 WD repeat-containing protein 20 [Acyrthosiphon pisum]
Chr01	79089876	intron_variant	Chr01.g02546	XP_003244940.1 battenin [Acyrthosiphon pisum]
Chr01	79100239	intron_variant	Chr01.g02547	XP_001949596.2 WD repeat-containing protein 20 [Acyrthosiphon pisum]
Chr01	79102892	intergenic_region	Chr01.g02547-Chr01.g02548	XP_001946541.2 general transcription factor IIF subunit 1 [Acyrthosiphon pisum]
Chr01	79321426	synonymous_variant	Chr01.g02555	XP_015368356.1 PREDICTED: cytochrome P450 6k1-like [Diuraphis noxia]
Chr01	79325305	intergenic_region	Chr01.g02555-Chr01.g02556	XP_015368356.1 PREDICTED: cytochrome P450 6k1-like [Diuraphis noxia]
Chr01	79429412	intron_variant	Chr01.g02556	XP_029343284.1 calmodulin-binding transcription activator 1 isoform X2 [Acyrthosiphon pisum]
Chr01	79436516	intron_variant	Chr01.g02556	XP_029343284.1 calmodulin-binding transcription activator 1 isoform X2 [Acyrthosiphon pisum]
Chr01	79514453	intron_variant	Chr01.g02556	XP_015370882.1 PREDICTED: uncharacterized protein LOC107166639 [Diuraphis noxia]
Chr01	79628071	synonymous_variant	Chr01.g02562	XP_016664236.1 papilin isoform X1 [Acyrthosiphon pisum]
Chr01	79628595	missense_variant	Chr01.g02562	XP_016664236.1 papilin isoform X1 [Acyrthosiphon pisum]
Chr01	79632021	synonymous_variant	Chr01.g02562	XP_016664236.1 papilin isoform X1 [Acyrthosiphon pisum]
Chr01	79636650	intron_variant	Chr01.g02562	XP_016664236.1 papilin isoform X1 [Acyrthosiphon pisum]
Chr01	79638560	intron_variant	Chr01.g02562	XP_022174078.1 ethylmalonyl-CoA decarboxylase-like [Myzus persicae]
Chr01	79638775	intron_variant	Chr01.g02562	XP_022174078.1 ethylmalonyl-CoA decarboxylase-like [Myzus persicae]
Chr01	79640521	intron_variant	Chr01.g02562	XP_022174078.1 ethylmalonyl-CoA decarboxylase-like [Myzus persicae]
Chr01	79698576	synonymous_variant	Chr01.g02568	XP_001952088.2 molybdenum cofactor biosynthesis protein 1 isoform X1 [Acyrthosiphon pisum]
Chr01	79700566	missense_variant	Chr01.g02568	XP_001952088.2 molybdenum cofactor biosynthesis protein 1 isoform X1 [Acyrthosiphon pisum]
Chr01	79757316	3_prime_UTR_variant	Chr01.g02570	XP_001952135.2 uncharacterized protein LOC100168252 isoform X1 [Acyrthosiphon pisum]
Chr01	79777277	5_prime_UTR_premature_start_codon_gain_variant	Chr01.g02570	XP_001952135.2 uncharacterized protein LOC100168252 isoform X1 [Acyrthosiphon pisum]
Chr01	79802329	5_prime_UTR_variant	Chr01.g02572	XP_016662292.1 uncharacterized protein LOC100160059 [Acyrthosiphon pisum]
Chr01	79919233	intron_variant	Chr01.g02576	XP_001947033.2 uncharacterized protein LOC100158681 [Acyrthosiphon pisum]
Chr01	79920807	missense_variant	Chr01.g02576	XP_001947033.2 uncharacterized protein LOC100158681 [Acyrthosiphon pisum]
Chr01	80009314	intron_variant	Chr01.g02580	XP_029343207.1 mitogen-activated protein kinase-binding protein 1 [Acyrthosiphon pisum]
Chr01	80009628	intron_variant	Chr01.g02580	XP_029343207.1 mitogen-activated protein kinase-binding protein 1 [Acyrthosiphon pisum]
Chr01	80010093	intron_variant	Chr01.g02580	XP_029343207.1 mitogen-activated protein kinase-binding protein 1 [Acyrthosiphon pisum]
Chr01	80014127	synonymous_variant	Chr01.g02580	XP_029343207.1 mitogen-activated protein kinase-binding protein 1 [Acyrthosiphon pisum]
Chr01	80268097	intergenic_region	Chr01.g02592-Chr01.g02593	XP_025191104.1 sialin-like [Melanaphis sacchari]
Chr01	80268631	intergenic_region	Chr01.g02592-Chr01.g02593	XP_025191104.1 sialin-like [Melanaphis sacchari]
Chr01	80277712	intron_variant	Chr01.g02593	XP_001947951.2 vanin-like protein 2 isoform X1 [Acyrthosiphon pisum]
Chr01	80284436	intron_variant	Chr01.g02593	XP_001947951.2 vanin-like protein 2 isoform X1 [Acyrthosiphon pisum]
Chr01	80285939	intron_variant	Chr01.g02593	XP_001947951.2 vanin-like protein 2 isoform X1 [Acyrthosiphon pisum]
Chr01	80285978	intron_variant	Chr01.g02593	XP_001947951.2 vanin-like protein 2 isoform X1 [Acyrthosiphon pisum]
Chr01	80355092	intron_variant	Chr01.g02594	XP_001948108.2 CCR4-NOT transcription complex subunit 1 isoform X1 [Acyrthosiphon pisum]
Chr01	80356457	missense_variant	Chr01.g02594	XP_001948108.2 CCR4-NOT transcription complex subunit 1 isoform X1 [Acyrthosiphon pisum]
Chr01	80387260	synonymous_variant	Chr01.g02597	XP_001948261.1 cytosol aminopeptidase isoform X2 [Acyrthosiphon pisum]
Chr01	80512084	intergenic_region	Chr01.g02602-Chr01.g02603
Chr01	80514657	intergenic_region	Chr01.g02602-Chr01.g02603
Chr01	80516750	intergenic_region	Chr01.g02602-Chr01.g02603
Chr01	80517829	intergenic_region	Chr01.g02602-Chr01.g02603
Chr01	80528527	intergenic_region	Chr01.g02602-Chr01.g02603
Chr01	80528543	intergenic_region	Chr01.g02602-Chr01.g02603
Chr01	80529690	intergenic_region	Chr01.g02602-Chr01.g02603
Chr01	80551543	intergenic_region	Chr01.g02602-Chr01.g02603
Chr01	80554744	intergenic_region	Chr01.g02602-Chr01.g02603
Chr01	80603249	intergenic_region	Chr01.g02602-Chr01.g02603
Chr01	80617366	intergenic_region	Chr01.g02602-Chr01.g02603
Chr01	80640920	intergenic_region	Chr01.g02602-Chr01.g02603
Chr01	80654102	intergenic_region	Chr01.g02602-Chr01.g02603
Chr01	80655767	intergenic_region	Chr01.g02602-Chr01.g02603
Chr01	80700779	intergenic_region	Chr01.g02602-Chr01.g02603
Chr01	80712589	intergenic_region	Chr01.g02602-Chr01.g02603
Chr01	80742282	intergenic_region	Chr01.g02603-Chr01.g02604
Chr01	80854006	intergenic_region	Chr01.g02605-Chr01.g02606
Chr01	80854012	intergenic_region	Chr01.g02605-Chr01.g02606
Chr01	80861294	intergenic_region	Chr01.g02605-Chr01.g02606	XP_029343151.1 uncharacterized protein LOC100160795 [Acyrthosiphon pisum]
Chr01	80889023	intergenic_region	Chr01.g02607-Chr01.g02608	XP_001948814.1 reticulon-4-interacting protein 1, mitochondrial [Acyrthosiphon pisum]
Chr01	80890262	intergenic_region	Chr01.g02607-Chr01.g02608	XP_001948814.1 reticulon-4-interacting protein 1, mitochondrial [Acyrthosiphon pisum]
Chr01	81139167	intergenic_region	Chr01.g02618-Chr01.g02619	XP_001944330.2 serine protease lint [Acyrthosiphon pisum]
Chr01	81351171	intergenic_region	Chr01.g02624-Chr01.g02625	XP_026816378.1 homeotic protein distal-less-like [Rhopalosiphum maidis]
Chr01	81366428	intron_variant	Chr01.g02625	XP_026816378.1 homeotic protein distal-less-like [Rhopalosiphum maidis]
Chr01	81393547	intron_variant	Chr01.g02625	XP_026816378.1 homeotic protein distal-less-like [Rhopalosiphum maidis]
Chr01	81421702	intron_variant	Chr01.g02625	XP_026816378.1 homeotic protein distal-less-like [Rhopalosiphum maidis]
Chr01	81431241	intron_variant	Chr01.g02625	XP_026816378.1 homeotic protein distal-less-like [Rhopalosiphum maidis]
Chr01	81431326	intron_variant	Chr01.g02625	XP_026816378.1 homeotic protein distal-less-like [Rhopalosiphum maidis]
Chr01	81445956	intron_variant	Chr01.g02625	XP_026816378.1 homeotic protein distal-less-like [Rhopalosiphum maidis]
Chr01	82234695	intron_variant	Chr01.g02648	XP_001943326.3 uncharacterized protein LOC100167073 [Acyrthosiphon pisum]
Chr01	82250405	intron_variant	Chr01.g02648	XP_001943326.3 uncharacterized protein LOC100167073 [Acyrthosiphon pisum]
Chr01	82262576	intron_variant	Chr01.g02648	XP_001943326.3 uncharacterized protein LOC100167073 [Acyrthosiphon pisum]
Chr01	82282187	intron_variant	Chr01.g02648	XP_001943326.3 uncharacterized protein LOC100167073 [Acyrthosiphon pisum]
Chr01	82283298	intron_variant	Chr01.g02648	XP_001943326.3 uncharacterized protein LOC100167073 [Acyrthosiphon pisum]
Chr01	82338775	intron_variant	Chr01.g02648	XP_001943326.3 uncharacterized protein LOC100167073 [Acyrthosiphon pisum]
Chr01	82366603	intron_variant	Chr01.g02648	XP_001943326.3 uncharacterized protein LOC100167073 [Acyrthosiphon pisum]
Chr01	82374964	intron_variant	Chr01.g02648	XP_001943326.3 uncharacterized protein LOC100167073 [Acyrthosiphon pisum]
Chr01	82375370	intron_variant	Chr01.g02648	XP_001943326.3 uncharacterized protein LOC100167073 [Acyrthosiphon pisum]
Chr01	82397776	intergenic_region	Chr01.g02648-Chr01.g02649	XP_001943326.3 uncharacterized protein LOC100167073 [Acyrthosiphon pisum]
Chr01	82408838	intergenic_region	Chr01.g02648-Chr01.g02649	XP_001943326.3 uncharacterized protein LOC100167073 [Acyrthosiphon pisum]
Chr01	82409452	intergenic_region	Chr01.g02648-Chr01.g02649	XP_001943326.3 uncharacterized protein LOC100167073 [Acyrthosiphon pisum]
Chr01	82410929	intergenic_region	Chr01.g02648-Chr01.g02649	XP_001943326.3 uncharacterized protein LOC100167073 [Acyrthosiphon pisum]
Chr01	82411375	intergenic_region	Chr01.g02648-Chr01.g02649	XP_001943326.3 uncharacterized protein LOC100167073 [Acyrthosiphon pisum]
Chr01	82418519	intergenic_region	Chr01.g02648-Chr01.g02649	XP_001943326.3 uncharacterized protein LOC100167073 [Acyrthosiphon pisum]
Chr01	82419108	intergenic_region	Chr01.g02648-Chr01.g02649	XP_001943326.3 uncharacterized protein LOC100167073 [Acyrthosiphon pisum]
Chr01	82647711	intron_variant	Chr01.g02654	XP_003246330.1 uncharacterized protein LOC100570047 [Acyrthosiphon pisum]
Chr01	82648551	intron_variant	Chr01.g02654	XP_003246330.1 uncharacterized protein LOC100570047 [Acyrthosiphon pisum]
Chr01	82648715	intron_variant	Chr01.g02654	XP_003246330.1 uncharacterized protein LOC100570047 [Acyrthosiphon pisum]
Chr01	82648727	intron_variant	Chr01.g02654	XP_003246330.1 uncharacterized protein LOC100570047 [Acyrthosiphon pisum]
Chr01	82658438	intron_variant	Chr01.g02654	XP_003246330.1 uncharacterized protein LOC100570047 [Acyrthosiphon pisum]
Chr01	82658529	intron_variant	Chr01.g02654	XP_003246330.1 uncharacterized protein LOC100570047 [Acyrthosiphon pisum]
Chr01	82658837	intron_variant	Chr01.g02654	XP_003246330.1 uncharacterized protein LOC100570047 [Acyrthosiphon pisum]
Chr01	82659146	intron_variant	Chr01.g02654	XP_003246330.1 uncharacterized protein LOC100570047 [Acyrthosiphon pisum]
Chr01	82800682	synonymous_variant	Chr01.g02659	XP_001942708.2 regulator of hypoxia-inducible factor 1 [Acyrthosiphon pisum]
Chr01	82847677	missense_variant	Chr01.g02659	XP_001942708.2 regulator of hypoxia-inducible factor 1 [Acyrthosiphon pisum]
Chr01	82847742	synonymous_variant	Chr01.g02659	XP_001942708.2 regulator of hypoxia-inducible factor 1 [Acyrthosiphon pisum]
Chr01	82848774	synonymous_variant	Chr01.g02659	XP_001942708.2 regulator of hypoxia-inducible factor 1 [Acyrthosiphon pisum]
Chr01	82872940	intron_variant	Chr01.g02661	XP_003241230.1 uncharacterized protein LOC100572757 [Acyrthosiphon pisum]
Chr01	82874730	intron_variant	Chr01.g02661	XP_003241230.1 uncharacterized protein LOC100572757 [Acyrthosiphon pisum]
Chr01	82952744	intergenic_region	Chr01.g02662-Chr01.g02663	XP_003241227.1 uncharacterized protein LOC100572413 isoform X1 [Acyrthosiphon pisum]
Chr01	83209954	synonymous_variant	Chr01.g02668	XP_015373956.1 PREDICTED: serine proteinase stubble [Diuraphis noxia]
Chr01	83210894	synonymous_variant	Chr01.g02668	XP_015373956.1 PREDICTED: serine proteinase stubble [Diuraphis noxia]
Chr01	83212081	synonymous_variant	Chr01.g02668	XP_015373956.1 PREDICTED: serine proteinase stubble [Diuraphis noxia]
Chr01	84146579	intron_variant	Chr01.g02744	XP_029342832.1 calcium/calmodulin-dependent 3',5'-cyclic nucleotide phosphodiesterase 1 isoform X4 [Acyrthosiphon pisum]
Chr01	84197975	intron_variant	Chr01.g02744	XP_029342832.1 calcium/calmodulin-dependent 3',5'-cyclic nucleotide phosphodiesterase 1 isoform X4 [Acyrthosiphon pisum]
Chr01	84266545	intron_variant	Chr01.g02744	XP_029342832.1 calcium/calmodulin-dependent 3',5'-cyclic nucleotide phosphodiesterase 1 isoform X4 [Acyrthosiphon pisum]
Chr01	84290559	intron_variant	Chr01.g02744	XP_029342832.1 calcium/calmodulin-dependent 3',5'-cyclic nucleotide phosphodiesterase 1 isoform X4 [Acyrthosiphon pisum]
Chr01	84328575	intron_variant	Chr01.g02744	XP_029342832.1 calcium/calmodulin-dependent 3',5'-cyclic nucleotide phosphodiesterase 1 isoform X4 [Acyrthosiphon pisum]
Chr01	84351675	intron_variant	Chr01.g02744	XP_029342832.1 calcium/calmodulin-dependent 3',5'-cyclic nucleotide phosphodiesterase 1 isoform X4 [Acyrthosiphon pisum]
Chr01	84535843	intron_variant	Chr01.g02744	XP_029342832.1 calcium/calmodulin-dependent 3',5'-cyclic nucleotide phosphodiesterase 1 isoform X4 [Acyrthosiphon pisum]
Chr01	84574088	intergenic_region	Chr01.g02744-Chr01.g02747	XP_029342832.1 calcium/calmodulin-dependent 3',5'-cyclic nucleotide phosphodiesterase 1 isoform X4 [Acyrthosiphon pisum]
Chr01	84693953	synonymous_variant	Chr01.g02753	XP_001951734.1 EGF domain-specific O-linked N-acetylglucosamine transferase [Acyrthosiphon pisum]
Chr01	84702443	missense_variant	Chr01.g02753	XP_001951734.1 EGF domain-specific O-linked N-acetylglucosamine transferase [Acyrthosiphon pisum]
Chr01	84738488	intergenic_region	Chr01.g02754-Chr01.g02755	BAH71805.1 ACYPI004229 [Acyrthosiphon pisum]
Chr01	84738787	intergenic_region	Chr01.g02754-Chr01.g02755	BAH71805.1 ACYPI004229 [Acyrthosiphon pisum]
Chr01	84749364	synonymous_variant	Chr01.g02755	BAH71805.1 ACYPI004229 [Acyrthosiphon pisum]
Chr01	84901691	intron_variant	Chr01.g02758	XP_029342790.1 uncharacterized protein LOC100164443 isoform X5 [Acyrthosiphon pisum]
Chr01	84901944	intron_variant	Chr01.g02758	XP_029342790.1 uncharacterized protein LOC100164443 isoform X5 [Acyrthosiphon pisum]
Chr01	84903491	intron_variant	Chr01.g02758	XP_029342790.1 uncharacterized protein LOC100164443 isoform X5 [Acyrthosiphon pisum]
Chr01	84903965	intron_variant	Chr01.g02758	XP_029342790.1 uncharacterized protein LOC100164443 isoform X5 [Acyrthosiphon pisum]
Chr01	84981855	intergenic_region	Chr01.g02760-Chr01.g02761	XP_029342787.1 uncharacterized protein LOC100164443 isoform X4 [Acyrthosiphon pisum]
Chr01	85238807	intergenic_region	Chr01.g02763-Chr01.g02764
Chr01	85271251	intergenic_region	Chr01.g02763-Chr01.g02764	XP_022168504.1 uncharacterized protein LOC111032464, partial [Myzus persicae]
Chr01	85279969	intergenic_region	Chr01.g02764-Chr01.g02765	XP_022168504.1 uncharacterized protein LOC111032464, partial [Myzus persicae]
Chr01	85282664	intergenic_region	Chr01.g02765-Chr01.g02766	XP_022168504.1 uncharacterized protein LOC111032464, partial [Myzus persicae]
Chr01	85306344	intergenic_region	Chr01.g02765-Chr01.g02766
Chr01	85306534	intergenic_region	Chr01.g02765-Chr01.g02766
Chr01	85306623	intergenic_region	Chr01.g02765-Chr01.g02766
Chr01	85306856	intergenic_region	Chr01.g02765-Chr01.g02766
Chr01	85327917	intergenic_region	Chr01.g02765-Chr01.g02766
Chr01	85337308	intergenic_region	Chr01.g02765-Chr01.g02766	XP_016659394.1 uncharacterized protein LOC100572597 [Acyrthosiphon pisum]
Chr01	85378619	intergenic_region	Chr01.g02767-Chr01.g02768
Chr01	85393257	intergenic_region	Chr01.g02767-Chr01.g02768
Chr01	85395860	intergenic_region	Chr01.g02767-Chr01.g02768
Chr01	85399857	intron_variant	Chr01.g02768
Chr01	85400379	intron_variant	Chr01.g02768
Chr01	85450395	intergenic_region	Chr01.g02769-Chr01.g02770
Chr01	85464651	intergenic_region	Chr01.g02769-Chr01.g02770
Chr01	85483411	intergenic_region	Chr01.g02769-Chr01.g02770
Chr01	85501228	intergenic_region	Chr01.g02769-Chr01.g02770
Chr01	85524682	intergenic_region	Chr01.g02769-Chr01.g02770
Chr01	85545980	intergenic_region	Chr01.g02769-Chr01.g02770
Chr01	85611319	synonymous_variant	Chr01.g02771	XP_025190963.1 LOW QUALITY PROTEIN: hemicentin-1-like [Melanaphis sacchari]
Chr01	85623552	intergenic_region	Chr01.g02772-Chr01.g02773
Chr01	85623565	intergenic_region	Chr01.g02772-Chr01.g02773
Chr01	85667780	intergenic_region	Chr01.g02773-Chr01.g02774	XP_001952489.2 uncharacterized protein LOC100166234 [Acyrthosiphon pisum]
Chr01	85668072	intergenic_region	Chr01.g02773-Chr01.g02774	XP_001952489.2 uncharacterized protein LOC100166234 [Acyrthosiphon pisum]
Chr01	85669326	intergenic_region	Chr01.g02773-Chr01.g02774	XP_001952489.2 uncharacterized protein LOC100166234 [Acyrthosiphon pisum]
Chr01	85699357	intergenic_region	Chr01.g02774-Chr01.g02775	XP_029342773.1 zinc finger CCCH domain-containing protein 10-like [Acyrthosiphon pisum]
Chr01	85733216	intergenic_region	Chr01.g02776-Chr01.g02777	XP_003245633.1 EF-hand domain-containing protein D2 homolog [Acyrthosiphon pisum]
Chr01	85734032	intergenic_region	Chr01.g02776-Chr01.g02777	XP_003245633.1 EF-hand domain-containing protein D2 homolog [Acyrthosiphon pisum]
Chr01	85759364	intergenic_region	Chr01.g02778-Chr01.g02779	XP_008184693.1 FAD-linked sulfhydryl oxidase ALR [Acyrthosiphon pisum]
Chr01	85856320	intron_variant	Chr01.g02785	XP_001950798.2 uncharacterized protein LOC100165401 [Acyrthosiphon pisum]
Chr01	85870245	intron_variant	Chr01.g02785	XP_001950798.2 uncharacterized protein LOC100165401 [Acyrthosiphon pisum]
Chr01	85870287	intron_variant	Chr01.g02785	XP_001950798.2 uncharacterized protein LOC100165401 [Acyrthosiphon pisum]
Chr01	85879442	intergenic_region	Chr01.g02785-Chr01.g02786	KAF0727503.1 zinc finger protein 567-like, partial [Aphis craccivora]
Chr01	85880339	intergenic_region	Chr01.g02785-Chr01.g02786	KAF0727503.1 zinc finger protein 567-like, partial [Aphis craccivora]
Chr01	87185657	intron_variant	Chr01.g02889	XP_016664183.1 MAGUK p55 subfamily member 6 [Acyrthosiphon pisum]
Chr01	87232302	intergenic_region	Chr01.g02891-Chr01.g02892	XP_001949104.1 tyrosine-protein phosphatase 99A isoform X1 [Acyrthosiphon pisum]
Chr01	87252862	intergenic_region	Chr01.g02892-Chr01.g02893	XP_001949104.1 tyrosine-protein phosphatase 99A isoform X1 [Acyrthosiphon pisum]
Chr01	87254292	intergenic_region	Chr01.g02892-Chr01.g02893	XP_008182567.1 epidermal growth factor receptor kinase substrate 8 [Acyrthosiphon pisum]
Chr01	87268628	intron_variant	Chr01.g02893	XP_008182567.1 epidermal growth factor receptor kinase substrate 8 [Acyrthosiphon pisum]
Chr01	87285193	intergenic_region	Chr01.g02893-Chr01.g02894	XP_008182567.1 epidermal growth factor receptor kinase substrate 8 [Acyrthosiphon pisum]
Chr01	87313875	intergenic_region	Chr01.g02895-Chr01.g02896	XP_008182570.1 protein abnormal spindle isoform X2 [Acyrthosiphon pisum]
Chr01	87339767	intergenic_region	Chr01.g02898-Chr01.g02899	NP_001156176.1 uncharacterized protein LOC100163835 [Acyrthosiphon pisum]
Chr01	87339933	intergenic_region	Chr01.g02898-Chr01.g02899	NP_001156176.1 uncharacterized protein LOC100163835 [Acyrthosiphon pisum]
Chr01	87340034	intergenic_region	Chr01.g02898-Chr01.g02899	NP_001156176.1 uncharacterized protein LOC100163835 [Acyrthosiphon pisum]
Chr01	87432471	intron_variant	Chr01.g02905	XP_026818121.1 whirlin-like isoform X1 [Rhopalosiphum maidis]
Chr01	87433682	intron_variant	Chr01.g02905	XP_026818121.1 whirlin-like isoform X1 [Rhopalosiphum maidis]
Chr01	87440686	intron_variant	Chr01.g02905	XP_026818121.1 whirlin-like isoform X1 [Rhopalosiphum maidis]
Chr01	87458539	intron_variant	Chr01.g02905	XP_026818121.1 whirlin-like isoform X1 [Rhopalosiphum maidis]
Chr01	87551439	intron_variant	Chr01.g02908	NP_001156258.1 uncharacterized protein LOC100167365 precursor [Acyrthosiphon pisum]
Chr01	87557840	intron_variant	Chr01.g02908	NP_001156258.1 uncharacterized protein LOC100167365 precursor [Acyrthosiphon pisum]
Chr01	87567618	intron_variant	Chr01.g02909	NP_001156209.1 uncharacterized protein LOC100165345 [Acyrthosiphon pisum]
Chr01	87574029	intergenic_region	Chr01.g02909-Chr01.g02910	NP_001156209.1 uncharacterized protein LOC100165345 [Acyrthosiphon pisum]
Chr01	87574193	intergenic_region	Chr01.g02909-Chr01.g02910	NP_001156209.1 uncharacterized protein LOC100165345 [Acyrthosiphon pisum]
Chr01	88720010	intergenic_region	Chr01.g02965-Chr01.g02966	XP_008178574.1 uncharacterized protein LOC103307901 [Acyrthosiphon pisum]
Chr01	89020363	intergenic_region	Chr01.g02993-Chr01.g02994	XP_027849933.1 uncharacterized protein LOC114129404 [Aphis gossypii]
Chr01	89158967	synonymous_variant	Chr01.g02999	XP_022173956.1 girdin-like [Myzus persicae]
Chr01	89195223	intergenic_region	Chr01.g03000-Chr01.g03001	XP_022173957.1 coiled-coil domain-containing protein 22 [Myzus persicae]
Chr01	89195276	intergenic_region	Chr01.g03000-Chr01.g03001	XP_022173957.1 coiled-coil domain-containing protein 22 [Myzus persicae]
Chr01	89195587	intergenic_region	Chr01.g03000-Chr01.g03001	XP_022173957.1 coiled-coil domain-containing protein 22 [Myzus persicae]
Chr01	90061162	intergenic_region	Chr01.g03053-Chr01.g03054	VVC34166.1 Hypothetical protein CINCED_3A019853 [Cinara cedri]
Chr01	90063496	intergenic_region	Chr01.g03053-Chr01.g03054	VVC34166.1 Hypothetical protein CINCED_3A019853 [Cinara cedri]
Chr01	92439408	5_prime_UTR_premature_start_codon_gain_variant	Chr01.g03224	XP_026815838.1 U3 small nucleolar RNA-associated protein 6 homolog [Rhopalosiphum maidis]
Chr01	92511035	intergenic_region	Chr01.g03229-Chr01.g03230	XP_001944788.2 uncharacterized protein C05D11.1 [Acyrthosiphon pisum]
Chr01	92514001	intergenic_region	Chr01.g03229-Chr01.g03230	XP_001944788.2 uncharacterized protein C05D11.1 [Acyrthosiphon pisum]
Chr01	92535841	intergenic_region	Chr01.g03231-Chr01.g03232	XP_025420322.1 general transcription factor II-I repeat domain-containing protein 2-like [Sipha flava]
Chr01	92962785	intergenic_region	Chr01.g03266-Chr01.g03267	VVC30367.1 Hypothetical protein CINCED_3A017155 [Cinara cedri]
Chr01	92963180	intergenic_region	Chr01.g03266-Chr01.g03267	VVC30367.1 Hypothetical protein CINCED_3A017155 [Cinara cedri]
Chr01	92964685	intron_variant	Chr01.g03267	VVC30367.1 Hypothetical protein CINCED_3A017155 [Cinara cedri]
Chr01	93048297	intron_variant	Chr01.g03273	XP_022166646.1 zinc finger MYM-type protein 1-like [Myzus persicae]
Chr01	93149721	missense_variant	Chr01.g03277	XP_029342202.1 ras-related protein Rab-7L1 [Acyrthosiphon pisum]
Chr01	93176557	missense_variant	Chr01.g03278	XP_001951817.1 U11/U12 small nuclear ribonucleoprotein 35 kDa protein [Acyrthosiphon pisum]
Chr01	93190903	synonymous_variant	Chr01.g03279	XP_008185057.1 ribonucleoprotein PTB-binding 1 isoform X1 [Acyrthosiphon pisum]
Chr01	93191065	synonymous_variant	Chr01.g03279	XP_008185057.1 ribonucleoprotein PTB-binding 1 isoform X1 [Acyrthosiphon pisum]
Chr01	93369515	intergenic_region	Chr01.g03282-Chr01.g03283	XP_008185055.1 protein maelstrom 2 [Acyrthosiphon pisum]
Chr01	93370141	intergenic_region	Chr01.g03282-Chr01.g03283	XP_008185055.1 protein maelstrom 2 [Acyrthosiphon pisum]
Chr01	93371680	intergenic_region	Chr01.g03282-Chr01.g03283	XP_008185055.1 protein maelstrom 2 [Acyrthosiphon pisum]
Chr01	93416423	synonymous_variant	Chr01.g03285	XP_008178433.1 uncharacterized protein LOC100169251 isoform X1 [Acyrthosiphon pisum]
Chr01	93417211	intron_variant	Chr01.g03285	XP_008178433.1 uncharacterized protein LOC100169251 isoform X1 [Acyrthosiphon pisum]
Chr01	93698546	missense_variant	Chr01.g03295	XP_025407531.1 uncharacterized protein LOC112681493 [Sipha flava]
Chr01	93807472	missense_variant	Chr01.g03308	KAF0747736.1 E3 SUMO-protein ligase KIAA1586-like [Aphis craccivora]
Chr01	94395487	intron_variant	Chr01.g03344	XP_008180545.1 uncharacterized protein LOC100569299 [Acyrthosiphon pisum]
Chr01	94915778	intergenic_region	Chr01.g03354-Chr01.g03355	XP_001943263.2 protein abrupt isoform X1 [Acyrthosiphon pisum]
Chr01	95012125	intron_variant	Chr01.g03356	XP_029342326.1 voltage-dependent L-type calcium channel subunit beta-1 [Acyrthosiphon pisum]
Chr01	95012522	intron_variant	Chr01.g03356	XP_029342326.1 voltage-dependent L-type calcium channel subunit beta-1 [Acyrthosiphon pisum]
Chr01	95012920	intron_variant	Chr01.g03356	XP_029342326.1 voltage-dependent L-type calcium channel subunit beta-1 [Acyrthosiphon pisum]
Chr01	95018393	intergenic_region	Chr01.g03356-Chr01.g03357	XP_029342326.1 voltage-dependent L-type calcium channel subunit beta-1 [Acyrthosiphon pisum]
Chr01	95021105	intergenic_region	Chr01.g03356-Chr01.g03357	XP_029342326.1 voltage-dependent L-type calcium channel subunit beta-1 [Acyrthosiphon pisum]
Chr01	95021869	intergenic_region	Chr01.g03356-Chr01.g03357	XP_029342326.1 voltage-dependent L-type calcium channel subunit beta-1 [Acyrthosiphon pisum]
Chr01	95022509	intergenic_region	Chr01.g03356-Chr01.g03357	XP_029342326.1 voltage-dependent L-type calcium channel subunit beta-1 [Acyrthosiphon pisum]
Chr01	95077206	intergenic_region	Chr01.g03359-Chr01.g03360	XP_001948917.4 scm-like with four MBT domains protein 1 isoform X1 [Acyrthosiphon pisum]
Chr01	95077208	intergenic_region	Chr01.g03359-Chr01.g03360	XP_001948917.4 scm-like with four MBT domains protein 1 isoform X1 [Acyrthosiphon pisum]
Chr01	95115071	intron_variant	Chr01.g03361	XP_027837076.1 eukaryotic translation initiation factor 5B-like [Aphis gossypii]
Chr01	95152382	intergenic_region	Chr01.g03364-Chr01.g03365	NP_001155616.1 protein cornichon homolog [Acyrthosiphon pisum]
Chr01	95165936	synonymous_variant	Chr01.g03365	XP_003248237.1 uncharacterized protein CG4449 isoform X1 [Acyrthosiphon pisum]
Chr01	95312562	intergenic_region	Chr01.g03368-Chr01.g03369	XP_022172115.1 uncharacterized protein LOC111034965 [Myzus persicae]
Chr01	95337642	intergenic_region	Chr01.g03368-Chr01.g03369	XP_022172115.1 uncharacterized protein LOC111034965 [Myzus persicae]
Chr01	95416407	intergenic_region	Chr01.g03369-Chr01.g03370	XP_001944970.1 calcium channel flower isoform X2 [Acyrthosiphon pisum]
Chr01	95430741	intron_variant	Chr01.g03371	XP_001944970.1 calcium channel flower isoform X2 [Acyrthosiphon pisum]
Chr01	95485680	intergenic_region	Chr01.g03374-Chr01.g03375	XP_001949156.2 E3 ubiquitin-protein ligase RING1-like [Acyrthosiphon pisum]
Chr01	95629132	intergenic_region	Chr01.g03376-Chr01.g03377	XP_001948564.2 cyclin-Y [Acyrthosiphon pisum]
Chr01	95632618	intron_variant	Chr01.g03377	XP_001948564.2 cyclin-Y [Acyrthosiphon pisum]
Chr01	95637835	intergenic_region	Chr01.g03377-Chr01.g03378	XP_001948564.2 cyclin-Y [Acyrthosiphon pisum]
Chr01	95689035	synonymous_variant	Chr01.g03379	KAE9544146.1 hypothetical protein AGLY_001835 [Aphis glycines]
Chr01	98062112	intergenic_region	Chr01.g03504-Chr01.g03505	KAF0761415.1 galactosylgalactosylxylosylprotein 3-beta-glucuronosyltransferase P-like [Aphis craccivora]
Chr01	98082096	synonymous_variant	Chr01.g03505	XP_003246447.1 neogenin isoform X1 [Acyrthosiphon pisum]
Chr01	98091843	synonymous_variant	Chr01.g03505	XP_003246447.1 neogenin isoform X1 [Acyrthosiphon pisum]
Chr01	98094919	intron_variant	Chr01.g03505	XP_003246447.1 neogenin isoform X1 [Acyrthosiphon pisum]
Chr01	98515208	synonymous_variant	Chr01.g03545	XP_008189754.1 probable nuclear hormone receptor HR3 isoform X3 [Acyrthosiphon pisum]
Chr01	98545125	intergenic_region	Chr01.g03546-Chr01.g03547
Chr01	98986698	intergenic_region	Chr01.g03576-Chr01.g03577	XP_016660902.1 uncharacterized protein LOC107884049 [Acyrthosiphon pisum]
Chr01	99200719	intergenic_region	Chr01.g03585-Chr01.g03586	XP_022182588.1 uncharacterized protein LOC111042324 [Myzus persicae]
Chr01	99385005	missense_variant	Chr01.g03613	XP_029348007.1 uncharacterized protein LOC115034743, partial [Acyrthosiphon pisum]
Chr01	99445686	intergenic_region	Chr01.g03619-Chr01.g03620	KAE9524511.1 hypothetical protein AGLY_015099 [Aphis glycines]
Chr01	99454421	intergenic_region	Chr01.g03619-Chr01.g03620	XP_016662233.1 putative Dol-P-Glc:Glc(2)Man(9)GlcNAc(2)-PP-Dol alpha-1,2-glucosyltransferase isoform X1 [Acyrthosiphon pisum]
Chr01	99455246	intergenic_region	Chr01.g03619-Chr01.g03620	XP_016662233.1 putative Dol-P-Glc:Glc(2)Man(9)GlcNAc(2)-PP-Dol alpha-1,2-glucosyltransferase isoform X1 [Acyrthosiphon pisum]
Chr01	99475656	intergenic_region	Chr01.g03620-Chr01.g03621	KAE9528607.1 hypothetical protein AGLY_012182 [Aphis glycines]
Chr01	99480909	missense_variant	Chr01.g03621	KAE9528607.1 hypothetical protein AGLY_012182 [Aphis glycines]
Chr01	99553443	intergenic_region	Chr01.g03621-Chr01.g03622	KAE9528607.1 hypothetical protein AGLY_012182 [Aphis glycines]
Chr01	99570634	intron_variant	Chr01.g03622	XP_029341879.1 plasma membrane calcium-transporting ATPase 2 isoform X4 [Acyrthosiphon pisum]
Chr01	99602663	missense_variant	Chr01.g03623	XP_001945158.2 plasma membrane calcium-transporting ATPase 2 isoform X1 [Acyrthosiphon pisum]
Chr01	99619187	intergenic_region	Chr01.g03623-Chr01.g03624	XP_001945158.2 plasma membrane calcium-transporting ATPase 2 isoform X1 [Acyrthosiphon pisum]
Chr01	100127451	intergenic_region	Chr01.g03660-Chr01.g03661	XP_022171892.1 uncharacterized protein LOC111034818 [Myzus persicae]
Chr01	100333872	synonymous_variant	Chr01.g03676	XP_001942738.2 homeobox protein SIX6 [Acyrthosiphon pisum]
Chr01	100375512	intergenic_region	Chr01.g03677-Chr01.g03678	XP_001942738.2 homeobox protein SIX6 [Acyrthosiphon pisum]
Chr01	100405700	intron_variant	Chr01.g03679	XP_029341854.1 histone deacetylase 6 [Acyrthosiphon pisum]
Chr01	100442481	intergenic_region	Chr01.g03681-Chr01.g03682	XP_001942737.1 sodium/potassium-transporting ATPase subunit beta-2 [Acyrthosiphon pisum]
Chr01	100442661	intergenic_region	Chr01.g03681-Chr01.g03682	XP_001942737.1 sodium/potassium-transporting ATPase subunit beta-2 [Acyrthosiphon pisum]
Chr01	100472822	intergenic_region	Chr01.g03683-Chr01.g03684	XP_016658303.1 28S ribosomal protein S18b, mitochondrial isoform X1 [Acyrthosiphon pisum]
Chr01	100499003	intergenic_region	Chr01.g03684-Chr01.g03685	XP_022172210.1 sodium/potassium-transporting ATPase subunit beta-2-like [Myzus persicae]
Chr01	100691350	intergenic_region	Chr01.g03692-Chr01.g03693	XP_001949721.2 protein O-mannosyltransferase 1 [Acyrthosiphon pisum]
Chr01	100692999	intergenic_region	Chr01.g03692-Chr01.g03693	XP_001949721.2 protein O-mannosyltransferase 1 [Acyrthosiphon pisum]
Chr01	100693285	intergenic_region	Chr01.g03692-Chr01.g03693	XP_001949721.2 protein O-mannosyltransferase 1 [Acyrthosiphon pisum]
Chr01	100693847	intergenic_region	Chr01.g03692-Chr01.g03693	XP_001949721.2 protein O-mannosyltransferase 1 [Acyrthosiphon pisum]
Chr01	100712663	synonymous_variant	Chr01.g03695	XP_001949647.2 serine/threonine-protein kinase SIK3 isoform X1 [Acyrthosiphon pisum]
Chr01	100730422	intron_variant	Chr01.g03695	XP_001949647.2 serine/threonine-protein kinase SIK3 isoform X1 [Acyrthosiphon pisum]
Chr01	100738505	intergenic_region	Chr01.g03695-Chr01.g03696	XP_001949647.2 serine/threonine-protein kinase SIK3 isoform X1 [Acyrthosiphon pisum]
Chr01	100758562	intergenic_region	Chr01.g03695-Chr01.g03696	XP_001949647.2 serine/threonine-protein kinase SIK3 isoform X1 [Acyrthosiphon pisum]
Chr01	100767011	intergenic_region	Chr01.g03695-Chr01.g03696	XP_001949647.2 serine/threonine-protein kinase SIK3 isoform X1 [Acyrthosiphon pisum]
Chr01	100767299	intergenic_region	Chr01.g03695-Chr01.g03696	XP_001949647.2 serine/threonine-protein kinase SIK3 isoform X1 [Acyrthosiphon pisum]
Chr01	100961412	intergenic_region	Chr01.g03698-Chr01.g03699
Chr01	101110676	intergenic_region	Chr01.g03700-Chr01.g03701	XP_008183103.1 uncharacterized protein LOC100168914 [Acyrthosiphon pisum]
Chr01	101177249	3_prime_UTR_variant	Chr01.g03703	XP_001952444.1 small glutamine-rich tetratricopeptide repeat-containing protein alpha [Acyrthosiphon pisum]
Chr01	102707409	intergenic_region	Chr01.g03759-Chr01.g03760	XP_029341642.1 RNA pseudouridylate synthase domain-containing protein 2, partial [Acyrthosiphon pisum]
Chr01	102710920	intergenic_region	Chr01.g03759-Chr01.g03760	XP_029341642.1 RNA pseudouridylate synthase domain-containing protein 2, partial [Acyrthosiphon pisum]
Chr01	102748194	intergenic_region	Chr01.g03759-Chr01.g03760
Chr01	102778770	intergenic_region	Chr01.g03760-Chr01.g03761
Chr01	102792171	intergenic_region	Chr01.g03761-Chr01.g03762	KAE9535201.1 hypothetical protein AGLY_007934 [Aphis glycines]
Chr01	102829852	intergenic_region	Chr01.g03761-Chr01.g03762	KAE9535201.1 hypothetical protein AGLY_007934 [Aphis glycines]
Chr01	102872395	intergenic_region	Chr01.g03761-Chr01.g03762	KAE9535201.1 hypothetical protein AGLY_007934 [Aphis glycines]
Chr01	102872576	intergenic_region	Chr01.g03761-Chr01.g03762	KAE9535201.1 hypothetical protein AGLY_007934 [Aphis glycines]
Chr01	102873491	intergenic_region	Chr01.g03761-Chr01.g03762	KAE9535201.1 hypothetical protein AGLY_007934 [Aphis glycines]
Chr01	102895479	intergenic_region	Chr01.g03761-Chr01.g03762	KAE9535201.1 hypothetical protein AGLY_007934 [Aphis glycines]
Chr01	102895502	intergenic_region	Chr01.g03761-Chr01.g03762	KAE9535201.1 hypothetical protein AGLY_007934 [Aphis glycines]
Chr01	102918329	intergenic_region	Chr01.g03761-Chr01.g03762	KAE9535201.1 hypothetical protein AGLY_007934 [Aphis glycines]
Chr01	102918989	intergenic_region	Chr01.g03761-Chr01.g03762	KAE9535201.1 hypothetical protein AGLY_007934 [Aphis glycines]
Chr01	102954559	intergenic_region	Chr01.g03762-Chr01.g03763	KAF0772623.1 zinc finger MYM-type protein 1-like, partial [Aphis craccivora]
Chr01	102969963	intergenic_region	Chr01.g03762-Chr01.g03763	KAF0772623.1 zinc finger MYM-type protein 1-like, partial [Aphis craccivora]
Chr01	102987232	intergenic_region	Chr01.g03762-Chr01.g03763	KAF0772623.1 zinc finger MYM-type protein 1-like, partial [Aphis craccivora]
Chr01	102995128	intergenic_region	Chr01.g03762-Chr01.g03763	KAF0772623.1 zinc finger MYM-type protein 1-like, partial [Aphis craccivora]
Chr01	103022380	intergenic_region	Chr01.g03762-Chr01.g03763
Chr01	103075774	intergenic_region	Chr01.g03763-Chr01.g03764
Chr01	103110053	intergenic_region	Chr01.g03763-Chr01.g03764
Chr01	103110064	intergenic_region	Chr01.g03763-Chr01.g03764
Chr01	103110846	intergenic_region	Chr01.g03763-Chr01.g03764
Chr01	103250544	intergenic_region	Chr01.g03765-Chr01.g03766	XP_022163421.1 uncharacterized protein LOC111028928 [Myzus persicae]
Chr01	103301330	intergenic_region	Chr01.g03768-Chr01.g03769	XP_029341592.1 cysteine protease ATG4B [Acyrthosiphon pisum]
Chr01	103317552	5_prime_UTR_variant	Chr01.g03769	XP_029341592.1 cysteine protease ATG4B [Acyrthosiphon pisum]
Chr01	103364258	intergenic_region	Chr01.g03770-Chr01.g03771	XP_003247629.1 uncharacterized protein LOC100571942 [Acyrthosiphon pisum]
Chr01	103532369	intergenic_region	Chr01.g03777-Chr01.g03778	XP_001947624.3 uncharacterized protein KIAA2013 homolog [Acyrthosiphon pisum]
Chr01	103532651	intergenic_region	Chr01.g03777-Chr01.g03778	XP_001947624.3 uncharacterized protein KIAA2013 homolog [Acyrthosiphon pisum]
Chr01	103533348	intergenic_region	Chr01.g03777-Chr01.g03778	XP_001947624.3 uncharacterized protein KIAA2013 homolog [Acyrthosiphon pisum]
Chr01	103614514	intergenic_region	Chr01.g03778-Chr01.g03779
Chr01	103615001	intergenic_region	Chr01.g03778-Chr01.g03779
Chr01	103618010	intergenic_region	Chr01.g03778-Chr01.g03779
Chr01	103619774	intergenic_region	Chr01.g03778-Chr01.g03779
Chr01	103827650	synonymous_variant	Chr01.g03782	XP_001942615.2 uncharacterized protein LOC100165697 [Acyrthosiphon pisum]
Chr01	103881821	synonymous_variant	Chr01.g03782	XP_001942615.2 uncharacterized protein LOC100165697 [Acyrthosiphon pisum]
Chr01	103991311	intron_variant	Chr01.g03785	BAH70811.1 ACYPI001947 [Acyrthosiphon pisum]
Chr01	104030448	intron_variant	Chr01.g03786	XP_022163394.1 muscle calcium channel subunit alpha-1 isoform X1 [Myzus persicae]
Chr01	104172705	intergenic_region	Chr01.g03786-Chr01.g03787	XP_003240920.2 uncharacterized protein LOC100573351 [Acyrthosiphon pisum]
Chr01	104235388	synonymous_variant	Chr01.g03790	XP_008189853.1 spondin-1 [Acyrthosiphon pisum]
Chr01	104355263	intron_variant	Chr01.g03796	XP_015373317.1 PREDICTED: collagen alpha-2(IV) chain [Diuraphis noxia]
Chr01	104599597	intron_variant	Chr01.g03804	XP_022166237.1 uncharacterized protein LOC111030850 isoform X1 [Myzus persicae]
Chr01	104620591	intron_variant	Chr01.g03804	XP_022166237.1 uncharacterized protein LOC111030850 isoform X1 [Myzus persicae]
Chr01	104654802	intergenic_region	Chr01.g03804-Chr01.g03805	XP_022166237.1 uncharacterized protein LOC111030850 isoform X1 [Myzus persicae]
Chr01	104673467	intergenic_region	Chr01.g03805-Chr01.g03806	XP_001945817.2 arylsulfatase B-like [Acyrthosiphon pisum]
Chr01	104674492	intergenic_region	Chr01.g03805-Chr01.g03806	XP_001945817.2 arylsulfatase B-like [Acyrthosiphon pisum]
Chr01	104675085	intergenic_region	Chr01.g03805-Chr01.g03806	XP_001945817.2 arylsulfatase B-like [Acyrthosiphon pisum]
Chr01	104701897	intergenic_region	Chr01.g03806-Chr01.g03807	XP_029341463.1 uncharacterized protein LOC100162654 isoform X1 [Acyrthosiphon pisum]
Chr01	104832207	intron_variant	Chr01.g03811	XP_029341407.1 glutamate decarboxylase isoform X1 [Acyrthosiphon pisum]
Chr01	104859208	intron_variant	Chr01.g03811	XP_029341407.1 glutamate decarboxylase isoform X1 [Acyrthosiphon pisum]
Chr01	104891214	intron_variant	Chr01.g03811	XP_029341407.1 glutamate decarboxylase isoform X1 [Acyrthosiphon pisum]
Chr01	104896845	intron_variant	Chr01.g03811	XP_029341407.1 glutamate decarboxylase isoform X1 [Acyrthosiphon pisum]
Chr01	104921743	intergenic_region	Chr01.g03811-Chr01.g03812	XP_029341407.1 glutamate decarboxylase isoform X1 [Acyrthosiphon pisum]
Chr01	104944550	intergenic_region	Chr01.g03812-Chr01.g03813
Chr01	104946145	intergenic_region	Chr01.g03812-Chr01.g03813
Chr01	105856648	intergenic_region	Chr01.g03839-Chr01.g03840	XP_027851959.1 uncharacterized protein LOC114131040, partial [Aphis gossypii]
Chr01	106090595	intergenic_region	Chr01.g03851-Chr01.g03852	KAE9542478.1 hypothetical protein AGLY_003339 [Aphis glycines]
Chr01	106137459	missense_variant	Chr01.g03853	XP_001948652.2 altered inheritance of mitochondria protein 3 [Acyrthosiphon pisum]
Chr01	106178323	intergenic_region	Chr01.g03854-Chr01.g03855	KAF0752048.1 zinc finger BED domain-containing protein RICESLEEPER 1-like isoform X1 [Aphis craccivora]
Chr01	106224336	intergenic_region	Chr01.g03854-Chr01.g03855	KAF0752048.1 zinc finger BED domain-containing protein RICESLEEPER 1-like isoform X1 [Aphis craccivora]
Chr01	106224451	intergenic_region	Chr01.g03854-Chr01.g03855	KAF0752048.1 zinc finger BED domain-containing protein RICESLEEPER 1-like isoform X1 [Aphis craccivora]
Chr01	106309854	intergenic_region	Chr01.g03854-Chr01.g03855	KAF0752048.1 zinc finger BED domain-containing protein RICESLEEPER 1-like isoform X1 [Aphis craccivora]
Chr01	106374534	intergenic_region	Chr01.g03856-Chr01.g03857	XP_001946546.2 uncharacterized protein LOC100162699 [Acyrthosiphon pisum]
Chr01	106376000	synonymous_variant	Chr01.g03857	XP_001946546.2 uncharacterized protein LOC100162699 [Acyrthosiphon pisum]
Chr01	106376021	synonymous_variant	Chr01.g03857	XP_001946546.2 uncharacterized protein LOC100162699 [Acyrthosiphon pisum]
Chr01	106391212	intergenic_region	Chr01.g03857-Chr01.g03858	XP_001946546.2 uncharacterized protein LOC100162699 [Acyrthosiphon pisum]
Chr01	106449274	intron_variant	Chr01.g03860
Chr01	106449316	intron_variant	Chr01.g03860
Chr01	107405171	synonymous_variant	Chr01.g03899	XP_001946450.2 probable G-protein coupled receptor Mth-like 3 isoform X2 [Acyrthosiphon pisum]
Chr01	107426155	missense_variant	Chr01.g03900	XP_016657587.1 G-protein coupled receptor Mth2 [Acyrthosiphon pisum]
Chr01	107472872	intergenic_region	Chr01.g03900-Chr01.g03901	XP_016657587.1 G-protein coupled receptor Mth2 [Acyrthosiphon pisum]
Chr01	107838520	intergenic_region	Chr01.g03908-Chr01.g03909	XP_003245096.1 tyrosine-protein kinase transmembrane receptor Ror isoform X1 [Acyrthosiphon pisum]
Chr01	107997696	intergenic_region	Chr01.g03915-Chr01.g03916	XP_016656222.1 THAP domain-containing protein 2-like isoform X1 [Acyrthosiphon pisum]
Chr01	108032969	intergenic_region	Chr01.g03919-Chr01.g03920	XP_029341070.1 E3 ubiquitin-protein ligase Su(dx) [Acyrthosiphon pisum]
Chr01	108151678	intergenic_region	Chr01.g03923-Chr01.g03924	XP_001946726.2 DNA repair protein complementing XP-G cells homolog isoform X1 [Acyrthosiphon pisum]
Chr01	108247113	intergenic_region	Chr01.g03924-Chr01.g03925	XP_022161049.1 protein timeless-like [Myzus persicae]
Chr01	108247296	intergenic_region	Chr01.g03924-Chr01.g03925	XP_022161049.1 protein timeless-like [Myzus persicae]
Chr01	108508264	intron_variant	Chr01.g03925	XP_029341036.1 cytokine receptor isoform X1 [Acyrthosiphon pisum]
Chr01	109262178	intergenic_region	Chr01.g03976-Chr01.g03977	XP_022175175.1 uncharacterized protein LOC111037107 isoform X1 [Myzus persicae]
Chr01	109954789	splice_region_variant&intron_variant	Chr01.g04034	XP_001943336.2 T-box transcription factor TBX20 [Acyrthosiphon pisum]
Chr01	109979505	intergenic_region	Chr01.g04034-Chr01.g04035	XP_025412360.1 zinc finger MYM-type protein 1-like isoform X1 [Sipha flava]
Chr01	110194218	intergenic_region	Chr01.g04039-Chr01.g04040	KAF0762193.1 Uncharacterized protein FWK35_00004015, partial [Aphis craccivora]
Chr01	110226323	intergenic_region	Chr01.g04039-Chr01.g04040	KAF0762193.1 Uncharacterized protein FWK35_00004015, partial [Aphis craccivora]
Chr01	110226631	intergenic_region	Chr01.g04039-Chr01.g04040	KAF0762193.1 Uncharacterized protein FWK35_00004015, partial [Aphis craccivora]
Chr01	110395058	intergenic_region	Chr01.g04045-Chr01.g04046	XP_008188555.1 zinc finger CCHC domain-containing protein 8 homolog [Acyrthosiphon pisum]
Chr01	110570743	intergenic_region	Chr01.g04053-Chr01.g04054	KAF0747278.1 CCHC-type domain-containing protein [Aphis craccivora]
Chr01	110674749	intergenic_region	Chr01.g04058-Chr01.g04059	KAE9525789.1 hypothetical protein AGLY_014015 [Aphis glycines]
Chr01	110679439	intergenic_region	Chr01.g04058-Chr01.g04059	KAE9525789.1 hypothetical protein AGLY_014015 [Aphis glycines]
Chr01	110680023	intergenic_region	Chr01.g04058-Chr01.g04059	KAE9525789.1 hypothetical protein AGLY_014015 [Aphis glycines]
Chr01	110693783	intergenic_region	Chr01.g04058-Chr01.g04059	XP_016655940.1 endoplasmic reticulum-Golgi intermediate compartment protein 2 [Acyrthosiphon pisum]
Chr01	111330350	intergenic_region	Chr01.g04074-Chr01.g04075	XP_029341458.1 FAD-linked sulfhydryl oxidase ALR-like [Acyrthosiphon pisum]
Chr01	111330873	intergenic_region	Chr01.g04074-Chr01.g04075	XP_029341458.1 FAD-linked sulfhydryl oxidase ALR-like [Acyrthosiphon pisum]
Chr01	111583553	intergenic_region	Chr01.g04090-Chr01.g04091	KAF0711873.1 THAP-type domain-containing protein, partial [Aphis craccivora]
Chr01	111586699	intergenic_region	Chr01.g04090-Chr01.g04091	KAF0711873.1 THAP-type domain-containing protein, partial [Aphis craccivora]
Chr01	112212714	intergenic_region	Chr01.g04131-Chr01.g04132	XP_008179517.1 uncharacterized protein LOC103308231 [Acyrthosiphon pisum]
Chr01	112423819	intergenic_region	Chr01.g04147-Chr01.g04148	XP_001951041.1 Wilms tumor protein 1-interacting protein [Acyrthosiphon pisum]
Chr01	112464699	intron_variant	Chr01.g04151	XP_001951002.2 uncharacterized protein LOC100169079 isoform X2 [Acyrthosiphon pisum]
Chr01	113043906	synonymous_variant	Chr01.g04205	XP_029348714.1 CD109 antigen isoform X1 [Acyrthosiphon pisum]
Chr01	113045668	intron_variant	Chr01.g04205	XP_029348714.1 CD109 antigen isoform X1 [Acyrthosiphon pisum]
Chr01	113052676	missense_variant	Chr01.g04205	XP_029348714.1 CD109 antigen isoform X1 [Acyrthosiphon pisum]
Chr01	113106339	intergenic_region	Chr01.g04205-Chr01.g04206	XP_029348714.1 CD109 antigen isoform X1 [Acyrthosiphon pisum]
Chr01	113112380	intergenic_region	Chr01.g04205-Chr01.g04206	XP_029348714.1 CD109 antigen isoform X1 [Acyrthosiphon pisum]
Chr01	113869604	intron_variant	Chr01.g04252	XP_001942701.2 uncharacterized protein LOC100162352 [Acyrthosiphon pisum]
Chr01	113917249	intron_variant	Chr01.g04256	XP_029348618.1 interaptin [Acyrthosiphon pisum]
Chr01	113920363	intergenic_region	Chr01.g04256-Chr01.g04257	XP_029348618.1 interaptin [Acyrthosiphon pisum]
Chr01	113960915	intergenic_region	Chr01.g04257-Chr01.g04258	XP_016657613.1 serine/threonine-protein kinase Genghis Khan isoform X1 [Acyrthosiphon pisum]
Chr01	113961146	intergenic_region	Chr01.g04257-Chr01.g04258	XP_016657613.1 serine/threonine-protein kinase Genghis Khan isoform X1 [Acyrthosiphon pisum]
Chr01	113961974	intergenic_region	Chr01.g04257-Chr01.g04258	XP_016657613.1 serine/threonine-protein kinase Genghis Khan isoform X1 [Acyrthosiphon pisum]
Chr01	113962201	intergenic_region	Chr01.g04257-Chr01.g04258	XP_016657613.1 serine/threonine-protein kinase Genghis Khan isoform X1 [Acyrthosiphon pisum]
Chr01	114007189	intron_variant	Chr01.g04259	XP_025190994.1 LOW QUALITY PROTEIN: uncharacterized protein LOC112591404 [Melanaphis sacchari]
Chr01	114097366	intergenic_region	Chr01.g04271-Chr01.g04272	XP_022165899.1 putative nuclease HARBI1 [Myzus persicae]
Chr01	114220074	intron_variant	Chr01.g04278	XP_001949185.2 homeobox protein engrailed-2 [Acyrthosiphon pisum]
Chr01	114220364	intron_variant	Chr01.g04278	XP_001949185.2 homeobox protein engrailed-2 [Acyrthosiphon pisum]
Chr01	115314350	intron_variant	Chr01.g04366	XP_022166646.1 zinc finger MYM-type protein 1-like [Myzus persicae]
Chr01	115367346	intergenic_region	Chr01.g04368-Chr01.g04369	XP_022182184.1 WASH complex subunit 4 [Myzus persicae]
Chr01	115408107	intergenic_region	Chr01.g04369-Chr01.g04370	KAF0750883.1 THAP-type domain-containing protein [Aphis craccivora]
Chr01	115408218	intergenic_region	Chr01.g04369-Chr01.g04370	KAF0750883.1 THAP-type domain-containing protein [Aphis craccivora]
Chr01	115410713	intergenic_region	Chr01.g04369-Chr01.g04370	KAF0750883.1 THAP-type domain-containing protein [Aphis craccivora]
Chr01	115411673	intergenic_region	Chr01.g04369-Chr01.g04370	KAF0752764.1 Uncharacterized protein FWK35_00015408 [Aphis craccivora]
Chr01	115429274	intergenic_region	Chr01.g04371-Chr01.g04372	XP_003241581.1 lachesin [Acyrthosiphon pisum]
Chr01	115556906	synonymous_variant	Chr01.g04379	XP_001945161.1 lachesin [Acyrthosiphon pisum]
Chr01	115812230	intron_variant	Chr01.g04388	XP_025203478.1 serine/threonine-protein kinase BRSK2 isoform X1 [Melanaphis sacchari]
Chr01	115815043	intron_variant	Chr01.g04388	XP_025203478.1 serine/threonine-protein kinase BRSK2 isoform X1 [Melanaphis sacchari]
Chr01	115819873	intron_variant	Chr01.g04388	XP_025203478.1 serine/threonine-protein kinase BRSK2 isoform X1 [Melanaphis sacchari]
Chr01	115819876	intron_variant	Chr01.g04388	XP_025203478.1 serine/threonine-protein kinase BRSK2 isoform X1 [Melanaphis sacchari]
Chr01	115820024	intron_variant	Chr01.g04388	XP_025203478.1 serine/threonine-protein kinase BRSK2 isoform X1 [Melanaphis sacchari]
Chr01	115830144	intron_variant	Chr01.g04388	XP_025203478.1 serine/threonine-protein kinase BRSK2 isoform X1 [Melanaphis sacchari]
Chr01	115830850	intron_variant	Chr01.g04388	XP_025203478.1 serine/threonine-protein kinase BRSK2 isoform X1 [Melanaphis sacchari]
Chr01	115857901	intron_variant	Chr01.g04390	NP_001280275.1 uncharacterized protein LOC100167705 [Acyrthosiphon pisum]
Chr01	115868449	intergenic_region	Chr01.g04390-Chr01.g04391	NP_001280275.1 uncharacterized protein LOC100167705 [Acyrthosiphon pisum]
Chr01	115875205	intergenic_region	Chr01.g04390-Chr01.g04391	XP_015375933.1 PREDICTED: CD151 antigen-like [Diuraphis noxia]
Chr01	116483954	intergenic_region	Chr01.g04442-Chr01.g04443	KAF0707628.1 Uncharacterized protein FWK35_00033555 [Aphis craccivora]
Chr01	116485130	intergenic_region	Chr01.g04442-Chr01.g04443	KAF0707628.1 Uncharacterized protein FWK35_00033555 [Aphis craccivora]
Chr01	116510458	intergenic_region	Chr01.g04442-Chr01.g04443	KAF0707628.1 Uncharacterized protein FWK35_00033555 [Aphis craccivora]
Chr01	116547141	intergenic_region	Chr01.g04444-Chr01.g04445	XP_003248025.1 trehalase isoform X4 [Acyrthosiphon pisum]
Chr01	116549511	intergenic_region	Chr01.g04444-Chr01.g04445	XP_003248025.1 trehalase isoform X4 [Acyrthosiphon pisum]
Chr01	116549895	intergenic_region	Chr01.g04444-Chr01.g04445	XP_003248025.1 trehalase isoform X4 [Acyrthosiphon pisum]
Chr01	116550574	intergenic_region	Chr01.g04444-Chr01.g04445	XP_003248025.1 trehalase isoform X4 [Acyrthosiphon pisum]
Chr01	116572607	intron_variant	Chr01.g04445	XP_001949417.2 mucolipin-3 [Acyrthosiphon pisum]
Chr01	116572850	intron_variant	Chr01.g04445	XP_001949417.2 mucolipin-3 [Acyrthosiphon pisum]
Chr01	116572900	intron_variant	Chr01.g04445	XP_001949417.2 mucolipin-3 [Acyrthosiphon pisum]
Chr01	116588675	intron_variant	Chr01.g04446	XP_001949369.1 dynamin-1-like protein [Acyrthosiphon pisum]
Chr01	116591952	intergenic_region	Chr01.g04446-Chr01.g04447	XP_001949369.1 dynamin-1-like protein [Acyrthosiphon pisum]
Chr01	116735693	intron_variant	Chr01.g04460	XP_022175768.1 coiled-coil domain-containing protein 25 [Myzus persicae]
Chr01	116736236	intron_variant	Chr01.g04460	XP_022175768.1 coiled-coil domain-containing protein 25 [Myzus persicae]
Chr01	116737483	intergenic_region	Chr01.g04460-Chr01.g04461	XP_022175768.1 coiled-coil domain-containing protein 25 [Myzus persicae]
Chr01	116740697	5_prime_UTR_premature_start_codon_gain_variant	Chr01.g04461	XP_022175768.1 coiled-coil domain-containing protein 25 [Myzus persicae]
Chr01	116875662	intergenic_region	Chr01.g04467-Chr01.g04468	XP_001951740.2 frizzled-2 [Acyrthosiphon pisum]
Chr01	116875919	intergenic_region	Chr01.g04467-Chr01.g04468	XP_001951740.2 frizzled-2 [Acyrthosiphon pisum]
Chr01	116875920	intergenic_region	Chr01.g04467-Chr01.g04468	XP_001951740.2 frizzled-2 [Acyrthosiphon pisum]
Chr01	117832421	intergenic_region	Chr01.g04555-Chr01.g04556	XP_001942640.1 uncharacterized protein LOC100163384 [Acyrthosiphon pisum]
Chr01	117846419	intergenic_region	Chr01.g04556-Chr01.g04557	XP_001942640.1 uncharacterized protein LOC100163384 [Acyrthosiphon pisum]
Chr01	117855271	3_prime_UTR_variant	Chr01.g04557	XP_029341844.1 uncharacterized protein LOC107882149 isoform X1 [Acyrthosiphon pisum]
Chr01	117855949	3_prime_UTR_variant	Chr01.g04557	XP_029341844.1 uncharacterized protein LOC107882149 isoform X1 [Acyrthosiphon pisum]
Chr01	117856342	intron_variant	Chr01.g04557	XP_029341844.1 uncharacterized protein LOC107882149 isoform X1 [Acyrthosiphon pisum]
Chr01	117928973	synonymous_variant	Chr01.g04559	XP_003242569.1 calponin homology domain-containing protein DDB_G0272472 isoform X1 [Acyrthosiphon pisum]
Chr01	117929099	synonymous_variant	Chr01.g04559	XP_003242569.1 calponin homology domain-containing protein DDB_G0272472 isoform X1 [Acyrthosiphon pisum]
Chr01	117999558	5_prime_UTR_variant	Chr01.g04561	XP_003242567.1 uncharacterized protein LOC100572622 isoform X1 [Acyrthosiphon pisum]
Chr01	118051507	missense_variant	Chr01.g04564	XP_015367163.1 PREDICTED: uncharacterized protein LOC107164012 isoform X1 [Diuraphis noxia]
Chr01	118112182	intron_variant	Chr01.g04567	XP_001942728.1 uncharacterized protein LOC100162021 isoform X1 [Acyrthosiphon pisum]
Chr01	118122438	intergenic_region	Chr01.g04567-Chr01.g04568
Chr01	118122919	intergenic_region	Chr01.g04567-Chr01.g04568
Chr01	118130342	intergenic_region	Chr01.g04568-Chr01.g04569
Chr01	118130856	intergenic_region	Chr01.g04568-Chr01.g04569
Chr01	118134836	synonymous_variant	Chr01.g04569	XP_008180409.1 uncharacterized protein LOC100569654 isoform X1 [Acyrthosiphon pisum]
Chr01	118147667	5_prime_UTR_variant	Chr01.g04569	XP_008180409.1 uncharacterized protein LOC100569654 isoform X1 [Acyrthosiphon pisum]
Chr01	118395226	synonymous_variant	Chr01.g04573	XP_003248222.1 kinesin-like protein KIP1 [Acyrthosiphon pisum]
Chr01	118404888	intron_variant	Chr01.g04574	XP_022164769.1 very-long-chain 3-oxoacyl-CoA reductase-like isoform X2 [Myzus persicae]
Chr01	118416699	synonymous_variant	Chr01.g04574	XP_022164769.1 very-long-chain 3-oxoacyl-CoA reductase-like isoform X2 [Myzus persicae]
Chr01	118419405	intergenic_region	Chr01.g04574-Chr01.g04575	XP_022164769.1 very-long-chain 3-oxoacyl-CoA reductase-like isoform X2 [Myzus persicae]
Chr01	118420355	intergenic_region	Chr01.g04574-Chr01.g04575	XP_022164769.1 very-long-chain 3-oxoacyl-CoA reductase-like isoform X2 [Myzus persicae]
Chr01	118467356	intron_variant	Chr01.g04577	XP_022164737.1 uncharacterized protein LOC111029845 [Myzus persicae]
Chr01	118615001	missense_variant	Chr01.g04583	XP_029348716.1 uncharacterized protein LOC100572846 [Acyrthosiphon pisum]
Chr01	118619169	missense_variant	Chr01.g04583	XP_029348716.1 uncharacterized protein LOC100572846 [Acyrthosiphon pisum]
Chr01	118658122	synonymous_variant	Chr01.g04586	XP_001942803.2 zinc finger protein 37 [Acyrthosiphon pisum]
Chr01	118691741	intergenic_region	Chr01.g04588-Chr01.g04589	XP_003247266.1 uncharacterized protein LOC100571463 [Acyrthosiphon pisum]
Chr01	118707584	missense_variant	Chr01.g04589	XP_003247266.1 uncharacterized protein LOC100571463 [Acyrthosiphon pisum]
Chr01	118707652	missense_variant	Chr01.g04589	XP_003247266.1 uncharacterized protein LOC100571463 [Acyrthosiphon pisum]
Chr01	118718214	intergenic_region	Chr01.g04589-Chr01.g04590	XP_003247266.1 uncharacterized protein LOC100571463 [Acyrthosiphon pisum]
Chr01	118768232	synonymous_variant	Chr01.g04591	XP_015374880.1 PREDICTED: uncharacterized protein LOC107169600 isoform X2 [Diuraphis noxia]
Chr01	119287598	intergenic_region	Chr01.g04602-Chr01.g04603	XP_029341827.1 uncharacterized protein LOC100572947 [Acyrthosiphon pisum]
Chr01	119306263	synonymous_variant	Chr01.g04603	XP_029341827.1 uncharacterized protein LOC100572947 [Acyrthosiphon pisum]
Chr01	119307230	missense_variant	Chr01.g04603	XP_029341827.1 uncharacterized protein LOC100572947 [Acyrthosiphon pisum]
Chr01	119310221	intron_variant	Chr01.g04604	XP_029341827.1 uncharacterized protein LOC100572947 [Acyrthosiphon pisum]
Chr01	119318405	synonymous_variant	Chr01.g04604	XP_001947344.2 inositol 1,4,5-trisphosphate receptor [Acyrthosiphon pisum]
Chr01	119318749	synonymous_variant	Chr01.g04604	XP_001947344.2 inositol 1,4,5-trisphosphate receptor [Acyrthosiphon pisum]
Chr01	119319905	synonymous_variant	Chr01.g04604	XP_001947344.2 inositol 1,4,5-trisphosphate receptor [Acyrthosiphon pisum]
Chr01	119323855	synonymous_variant	Chr01.g04604	XP_001947344.2 inositol 1,4,5-trisphosphate receptor [Acyrthosiphon pisum]
Chr01	119333846	missense_variant	Chr01.g04604	XP_001947344.2 inositol 1,4,5-trisphosphate receptor [Acyrthosiphon pisum]
Chr01	119365975	synonymous_variant	Chr01.g04606	XP_001947402.2 uncharacterized protein LOC100161558 [Acyrthosiphon pisum]
Chr01	119379967	intron_variant	Chr01.g04606	XP_016662122.1 kelch-like protein 10 isoform X2 [Acyrthosiphon pisum]
Chr01	119380013	intron_variant	Chr01.g04606	XP_016662122.1 kelch-like protein 10 isoform X2 [Acyrthosiphon pisum]
Chr01	119380082	intron_variant	Chr01.g04606	XP_016662122.1 kelch-like protein 10 isoform X2 [Acyrthosiphon pisum]
Chr01	119380298	intron_variant	Chr01.g04606	XP_016662122.1 kelch-like protein 10 isoform X2 [Acyrthosiphon pisum]
Chr01	119761130	intergenic_region	Chr01.g04623-Chr01.g04624	XP_003241122.1 dynamin-1-like protein [Acyrthosiphon pisum]
Chr01	119761659	intergenic_region	Chr01.g04623-Chr01.g04624	XP_003241122.1 dynamin-1-like protein [Acyrthosiphon pisum]
Chr01	119835185	intergenic_region	Chr01.g04628-Chr01.g04629	XP_029344976.1 kelch-like protein 2 [Acyrthosiphon pisum]
Chr01	120230281	intergenic_region	Chr01.g04640-Chr01.g04641	XP_029348385.1 uncharacterized protein LOC107882680, partial [Acyrthosiphon pisum]
Chr01	120269136	intron_variant	Chr01.g04642
Chr01	120502271	intron_variant	Chr01.g04649	XP_029341817.1 homeobox protein B-H1-like [Acyrthosiphon pisum]
Chr01	120563785	intergenic_region	Chr01.g04649-Chr01.g04650	XP_029341817.1 homeobox protein B-H1-like [Acyrthosiphon pisum]
Chr01	120878127	intergenic_region	Chr01.g04657-Chr01.g04658	KAE9533667.1 hypothetical protein AGLY_009016 [Aphis glycines]
Chr01	120880415	intergenic_region	Chr01.g04657-Chr01.g04658	KAE9533667.1 hypothetical protein AGLY_009016 [Aphis glycines]
Chr01	120973331	intergenic_region	Chr01.g04659-Chr01.g04660	XP_001948242.1 receptor expression-enhancing protein 1 [Acyrthosiphon pisum]
Chr01	121032133	intron_variant	Chr01.g04661	XP_029341820.1 uncharacterized protein LOC100167149 isoform X1 [Acyrthosiphon pisum]
Chr01	121045327	intron_variant	Chr01.g04661	XP_029341820.1 uncharacterized protein LOC100167149 isoform X1 [Acyrthosiphon pisum]
Chr01	121078783	intron_variant	Chr01.g04661	XP_029341820.1 uncharacterized protein LOC100167149 isoform X1 [Acyrthosiphon pisum]
Chr01	121197356	intergenic_region	Chr01.g04661-Chr01.g04662	XP_029341820.1 uncharacterized protein LOC100167149 isoform X1 [Acyrthosiphon pisum]
Chr01	121198902	intergenic_region	Chr01.g04661-Chr01.g04662	XP_029341820.1 uncharacterized protein LOC100167149 isoform X1 [Acyrthosiphon pisum]
Chr01	121455588	missense_variant	Chr01.g04672	XP_029341813.1 laminin subunit alpha-1 [Acyrthosiphon pisum]
Chr01	121460006	synonymous_variant	Chr01.g04672	XP_029341813.1 laminin subunit alpha-1 [Acyrthosiphon pisum]
Chr01	121760673	intron_variant	Chr01.g04677	XP_001943945.2 uncharacterized protein LOC100164329 [Acyrthosiphon pisum]
Chr01	122349682	intergenic_region	Chr01.g04685-Chr01.g04686
Chr01	122350072	intergenic_region	Chr01.g04685-Chr01.g04686
Chr01	122363280	intron_variant	Chr01.g04687
Chr01	122364596	intron_variant	Chr01.g04687
Chr01	122400809	intergenic_region	Chr01.g04687-Chr01.g04688
Chr01	122412934	intergenic_region	Chr01.g04687-Chr01.g04688
Chr01	122422069	intergenic_region	Chr01.g04687-Chr01.g04688
Chr01	122439327	intergenic_region	Chr01.g04687-Chr01.g04688
Chr01	122439351	intergenic_region	Chr01.g04687-Chr01.g04688
Chr01	122442262	intergenic_region	Chr01.g04687-Chr01.g04688
Chr01	122443758	intergenic_region	Chr01.g04687-Chr01.g04688
Chr01	122444250	intergenic_region	Chr01.g04687-Chr01.g04688
Chr01	122444894	intergenic_region	Chr01.g04687-Chr01.g04688
Chr01	122446203	intergenic_region	Chr01.g04687-Chr01.g04688
Chr01	122482300	intergenic_region	Chr01.g04691-Chr01.g04692
Chr01	122518095	intergenic_region	Chr01.g04693-Chr01.g04694
Chr01	122540363	intergenic_region	Chr01.g04695-Chr01.g04696
Chr01	122545246	intergenic_region	Chr01.g04695-Chr01.g04696
Chr01	122552467	intergenic_region	Chr01.g04696-Chr01.g04697
Chr01	122552477	intergenic_region	Chr01.g04696-Chr01.g04697
Chr01	122552970	intergenic_region	Chr01.g04696-Chr01.g04697
Chr01	122553768	intergenic_region	Chr01.g04696-Chr01.g04697
Chr01	122596924	intergenic_region	Chr01.g04699-Chr01.g04700	XP_001942892.2 ephrin-B1 [Acyrthosiphon pisum]
Chr01	122659686	intergenic_region	Chr01.g04700-Chr01.g04701	XP_029348704.1 microtubule-associated serine/threonine-protein kinase 3 [Acyrthosiphon pisum]
Chr01	122659953	intergenic_region	Chr01.g04700-Chr01.g04701	XP_029348704.1 microtubule-associated serine/threonine-protein kinase 3 [Acyrthosiphon pisum]
Chr01	122760248	intergenic_region	Chr01.g04703-Chr01.g04704	XP_022175324.1 probable phospholipid-transporting ATPase IA [Myzus persicae]
Chr01	122761468	intergenic_region	Chr01.g04703-Chr01.g04704	XP_022175324.1 probable phospholipid-transporting ATPase IA [Myzus persicae]
Chr01	122812794	synonymous_variant	Chr01.g04706	XP_001950980.2 phenoloxidase-activating factor 2 isoform X1 [Acyrthosiphon pisum]
Chr01	122848370	synonymous_variant	Chr01.g04707	XP_001948608.2 ATP-dependent RNA helicase vasa [Acyrthosiphon pisum]
Chr01	122896814	intron_variant	Chr01.g04709	XP_001952301.1 phenoloxidase-activating factor 2 [Acyrthosiphon pisum]
Chr01	122899608	synonymous_variant	Chr01.g04709	XP_001952301.1 phenoloxidase-activating factor 2 [Acyrthosiphon pisum]
Chr01	123240582	intron_variant	Chr01.g04721	XP_008188431.1 chromodomain-helicase-DNA-binding protein 7 isoform X3 [Acyrthosiphon pisum]
Chr01	123245798	intron_variant	Chr01.g04721	XP_008188431.1 chromodomain-helicase-DNA-binding protein 7 isoform X3 [Acyrthosiphon pisum]
Chr01	123247063	intron_variant	Chr01.g04721	XP_008188431.1 chromodomain-helicase-DNA-binding protein 7 isoform X3 [Acyrthosiphon pisum]
Chr01	123249777	intron_variant	Chr01.g04721	XP_008188431.1 chromodomain-helicase-DNA-binding protein 7 isoform X3 [Acyrthosiphon pisum]
Chr01	123249920	intron_variant	Chr01.g04721	XP_008188431.1 chromodomain-helicase-DNA-binding protein 7 isoform X3 [Acyrthosiphon pisum]
Chr01	123310275	synonymous_variant	Chr01.g04725	XP_003245926.1 uncharacterized protein LOC100573579 isoform X1 [Acyrthosiphon pisum]
Chr01	123313034	missense_variant&splice_region_variant	Chr01.g04725	XP_003245926.1 uncharacterized protein LOC100573579 isoform X1 [Acyrthosiphon pisum]
Chr01	123470835	intergenic_region	Chr01.g04732-Chr01.g04733	XP_027845906.1 sex peptide receptor [Aphis gossypii]
Chr01	123561806	intron_variant	Chr01.g04733	XP_027845906.1 sex peptide receptor [Aphis gossypii]
Chr01	123571983	intron_variant	Chr01.g04733	XP_027845906.1 sex peptide receptor [Aphis gossypii]
Chr01	123579068	intron_variant	Chr01.g04733	XP_027845906.1 sex peptide receptor [Aphis gossypii]
Chr01	123583039	intron_variant	Chr01.g04733	XP_027845906.1 sex peptide receptor [Aphis gossypii]
Chr01	123601876	intron_variant	Chr01.g04733	XP_027845906.1 sex peptide receptor [Aphis gossypii]
Chr01	123601930	intron_variant	Chr01.g04733	XP_027845906.1 sex peptide receptor [Aphis gossypii]
Chr01	123651532	intron_variant	Chr01.g04733	XP_027845906.1 sex peptide receptor [Aphis gossypii]
Chr01	123678335	intron_variant	Chr01.g04733	XP_027845906.1 sex peptide receptor [Aphis gossypii]
Chr01	124077165	intergenic_region	Chr01.g04740-Chr01.g04741	XP_025194179.1 LOW QUALITY PROTEIN: uncharacterized protein LOC112593823 [Melanaphis sacchari]
Chr01	124077698	intergenic_region	Chr01.g04740-Chr01.g04741	XP_025194179.1 LOW QUALITY PROTEIN: uncharacterized protein LOC112593823 [Melanaphis sacchari]
Chr01	124077765	intergenic_region	Chr01.g04740-Chr01.g04741	XP_025194179.1 LOW QUALITY PROTEIN: uncharacterized protein LOC112593823 [Melanaphis sacchari]
Chr01	124078429	intergenic_region	Chr01.g04740-Chr01.g04741	XP_025194179.1 LOW QUALITY PROTEIN: uncharacterized protein LOC112593823 [Melanaphis sacchari]
Chr01	124078493	intergenic_region	Chr01.g04740-Chr01.g04741	XP_025194179.1 LOW QUALITY PROTEIN: uncharacterized protein LOC112593823 [Melanaphis sacchari]
Chr01	124654744	intron_variant	Chr01.g04764	XP_008186905.2 LOW QUALITY PROTEIN: uncharacterized protein LOC100165866 [Acyrthosiphon pisum]
Chr01	124654784	intron_variant	Chr01.g04764	XP_008186905.2 LOW QUALITY PROTEIN: uncharacterized protein LOC100165866 [Acyrthosiphon pisum]
Chr01	124705263	intron_variant	Chr01.g04765	XP_025196003.1 uncharacterized protein LOC112595126 [Melanaphis sacchari]
Chr01	124709505	intron_variant	Chr01.g04765	XP_025196003.1 uncharacterized protein LOC112595126 [Melanaphis sacchari]
Chr01	124805084	intergenic_region	Chr01.g04765-Chr01.g04766	XP_008186225.2 basic-leucine zipper transcription factor A [Acyrthosiphon pisum]
Chr01	124806977	synonymous_variant	Chr01.g04766	XP_008186225.2 basic-leucine zipper transcription factor A [Acyrthosiphon pisum]
Chr01	124807037	synonymous_variant	Chr01.g04766	XP_008186225.2 basic-leucine zipper transcription factor A [Acyrthosiphon pisum]
Chr01	124807340	synonymous_variant	Chr01.g04766	XP_008186225.2 basic-leucine zipper transcription factor A [Acyrthosiphon pisum]
Chr01	124807376	synonymous_variant	Chr01.g04766	XP_008186225.2 basic-leucine zipper transcription factor A [Acyrthosiphon pisum]
Chr01	124807385	synonymous_variant	Chr01.g04766	XP_008186225.2 basic-leucine zipper transcription factor A [Acyrthosiphon pisum]
Chr01	124807679	synonymous_variant	Chr01.g04766	XP_008186225.2 basic-leucine zipper transcription factor A [Acyrthosiphon pisum]
Chr01	124816092	intergenic_region	Chr01.g04767-Chr01.g04768
Chr01	124822392	intergenic_region	Chr01.g04767-Chr01.g04768
Chr01	124822466	intergenic_region	Chr01.g04767-Chr01.g04768
Chr01	125294905	intron_variant	Chr01.g04780	XP_001942619.2 KN motif and ankyrin repeat domain-containing protein 2 [Acyrthosiphon pisum]
Chr01	125474442	intron_variant	Chr01.g04784	XP_008181754.1 pyruvate dehydrogenase (acetyl-transferring) kinase, mitochondrial [Acyrthosiphon pisum]
Chr01	125500911	intergenic_region	Chr01.g04784-Chr01.g04785	KAF0753693.1 carbonic anhydrase 7-like [Aphis craccivora]
Chr01	125500914	intergenic_region	Chr01.g04784-Chr01.g04785	KAF0753693.1 carbonic anhydrase 7-like [Aphis craccivora]
Chr01	125626850	intergenic_region	Chr01.g04787-Chr01.g04788
Chr01	125670667	synonymous_variant	Chr01.g04788	XP_001950025.4 mitochondrial assembly of ribosomal large subunit protein 1 [Acyrthosiphon pisum]
Chr01	125847909	missense_variant	Chr01.g04801	KAF0761300.1 26S proteasome non-ATPase regulatory subunit 12 [Aphis craccivora]
Chr01	126045658	intron_variant	Chr01.g04810	XP_026817572.1 LOW QUALITY PROTEIN: uncharacterized protein LOC113556677 [Rhopalosiphum maidis]
Chr01	126121401	intergenic_region	Chr01.g04813-Chr01.g04814	XP_008187346.1 protein decapentaplegic-like [Acyrthosiphon pisum]
Chr01	126844241	intergenic_region	Chr01.g04841-Chr01.g04842	XP_022173326.1 myelin regulatory factor-like protein isoform X1 [Myzus persicae]
Chr01	126859907	intron_variant	Chr01.g04842	XP_022173326.1 myelin regulatory factor-like protein isoform X1 [Myzus persicae]
Chr01	126951242	intergenic_region	Chr01.g04846-Chr01.g04847	XP_029347930.1 activin receptor type-2B-like [Acyrthosiphon pisum]
Chr01	126955250	intergenic_region	Chr01.g04846-Chr01.g04847	XP_029347930.1 activin receptor type-2B-like [Acyrthosiphon pisum]
Chr01	126958937	intergenic_region	Chr01.g04846-Chr01.g04847	XP_029347930.1 activin receptor type-2B-like [Acyrthosiphon pisum]
Chr01	126958944	intergenic_region	Chr01.g04846-Chr01.g04847	XP_029347930.1 activin receptor type-2B-like [Acyrthosiphon pisum]
Chr01	126981592	intergenic_region	Chr01.g04846-Chr01.g04847	XP_003246030.1 zinc finger protein 43 [Acyrthosiphon pisum]
Chr01	127147888	5_prime_UTR_variant	Chr01.g04857	XP_029341750.1 putative fatty acyl-CoA reductase CG5065 [Acyrthosiphon pisum]
Chr01	127152045	intron_variant	Chr01.g04857	XP_029341750.1 putative fatty acyl-CoA reductase CG5065 [Acyrthosiphon pisum]
Chr01	127996909	synonymous_variant	Chr01.g04901	XP_008183960.1 7-methylguanosine phosphate-specific 5'-nucleotidase [Acyrthosiphon pisum]
Chr01	128003235	synonymous_variant	Chr01.g04902	XP_001947737.1 galactosylgalactosylxylosylprotein 3-beta-glucuronosyltransferase S [Acyrthosiphon pisum]
Chr01	128015951	splice_donor_variant&intron_variant	Chr01.g04902	XP_001947737.1 galactosylgalactosylxylosylprotein 3-beta-glucuronosyltransferase S [Acyrthosiphon pisum]
Chr01	128025345	intergenic_region	Chr01.g04902-Chr01.g04903	XP_001947737.1 galactosylgalactosylxylosylprotein 3-beta-glucuronosyltransferase S [Acyrthosiphon pisum]
Chr01	128038713	intergenic_region	Chr01.g04902-Chr01.g04903	XP_001947737.1 galactosylgalactosylxylosylprotein 3-beta-glucuronosyltransferase S [Acyrthosiphon pisum]
Chr01	128098571	intergenic_region	Chr01.g04902-Chr01.g04903	XP_001947737.1 galactosylgalactosylxylosylprotein 3-beta-glucuronosyltransferase S [Acyrthosiphon pisum]
Chr01	128128322	intergenic_region	Chr01.g04903-Chr01.g04904	XP_008186329.1 peroxiredoxin 1 isoform X1 [Acyrthosiphon pisum]
Chr01	128141290	intron_variant	Chr01.g04905	XP_029341403.1 uncharacterized protein LOC115033266 [Acyrthosiphon pisum]
Chr01	128201826	intron_variant	Chr01.g04907	XP_003244317.1 one cut domain family member 2-like isoform X2 [Acyrthosiphon pisum]
Chr01	128201942	intron_variant	Chr01.g04907	XP_003244317.1 one cut domain family member 2-like isoform X2 [Acyrthosiphon pisum]
Chr01	128222244	synonymous_variant	Chr01.g04907	XP_003244317.1 one cut domain family member 2-like isoform X2 [Acyrthosiphon pisum]
Chr01	128223271	5_prime_UTR_variant	Chr01.g04907	XP_003244317.1 one cut domain family member 2-like isoform X2 [Acyrthosiphon pisum]
Chr01	128311985	intron_variant	Chr01.g04912	XP_015370492.1 PREDICTED: junctophilin-1 isoform X1 [Diuraphis noxia]
Chr01	128313597	intron_variant	Chr01.g04912
Chr01	128360062	intron_variant	Chr01.g04912	XP_015370492.1 PREDICTED: junctophilin-1 isoform X1 [Diuraphis noxia]
Chr01	128374323	intron_variant	Chr01.g04912	XP_022168465.1 KRAB-A domain-containing protein 2-like, partial [Myzus persicae]
Chr01	128401646	intron_variant	Chr01.g04912	XP_015370492.1 PREDICTED: junctophilin-1 isoform X1 [Diuraphis noxia]
Chr01	128425172	intron_variant	Chr01.g04912	XP_015370492.1 PREDICTED: junctophilin-1 isoform X1 [Diuraphis noxia]
Chr01	128502315	intergenic_region	Chr01.g04916-Chr01.g04917
Chr01	128502824	intergenic_region	Chr01.g04916-Chr01.g04917
Chr01	128513557	intergenic_region	Chr01.g04916-Chr01.g04917
Chr01	128522206	intergenic_region	Chr01.g04916-Chr01.g04917
Chr01	128541099	intron_variant	Chr01.g04917	KAF0734120.1 zinc finger MYM-type protein 1-like [Aphis craccivora]
Chr01	128573801	intergenic_region	Chr01.g04918-Chr01.g04919	XP_015370492.1 PREDICTED: junctophilin-1 isoform X1 [Diuraphis noxia]
Chr01	128592731	intergenic_region	Chr01.g04918-Chr01.g04919	XP_015370492.1 PREDICTED: junctophilin-1 isoform X1 [Diuraphis noxia]
Chr01	128594997	intergenic_region	Chr01.g04918-Chr01.g04919	XP_015370492.1 PREDICTED: junctophilin-1 isoform X1 [Diuraphis noxia]
Chr01	128916954	intergenic_region	Chr01.g04921-Chr01.g04922
Chr01	128926791	intergenic_region	Chr01.g04921-Chr01.g04922
Chr01	128927002	intergenic_region	Chr01.g04921-Chr01.g04922
Chr01	128936539	intergenic_region	Chr01.g04921-Chr01.g04922
Chr01	128995070	intergenic_region	Chr01.g04921-Chr01.g04922
Chr01	129005996	intergenic_region	Chr01.g04921-Chr01.g04922
Chr01	129042588	intergenic_region	Chr01.g04922-Chr01.g04923	KAE9529198.1 hypothetical protein AGLY_011994 [Aphis glycines]
Chr01	129042888	intergenic_region	Chr01.g04922-Chr01.g04923	KAE9529198.1 hypothetical protein AGLY_011994 [Aphis glycines]
Chr01	129043526	intergenic_region	Chr01.g04922-Chr01.g04923	KAE9529198.1 hypothetical protein AGLY_011994 [Aphis glycines]
Chr01	129455306	5_prime_UTR_variant	Chr01.g04936	XP_001945184.2 probable ATP-dependent RNA helicase DHX35 [Acyrthosiphon pisum]
Chr01	129608623	3_prime_UTR_variant	Chr01.g04945	XP_008185199.1 uncharacterized protein LOC100158689 [Acyrthosiphon pisum]
Chr01	129654797	intron_variant	Chr01.g04949	XP_001952582.2 MFS-type transporter SLC18B1 [Acyrthosiphon pisum]
Chr01	129688435	intergenic_region	Chr01.g04949-Chr01.g04950	XP_001952582.2 MFS-type transporter SLC18B1 [Acyrthosiphon pisum]
Chr01	129806071	intergenic_region	Chr01.g04955-Chr01.g04956	XP_001943998.2 putative uncharacterized protein DDB_G0282499 [Acyrthosiphon pisum]
Chr01	129810146	intergenic_region	Chr01.g04955-Chr01.g04956	XP_001943998.2 putative uncharacterized protein DDB_G0282499 [Acyrthosiphon pisum]
Chr01	129816270	intergenic_region	Chr01.g04956-Chr01.g04957	XP_001943998.2 putative uncharacterized protein DDB_G0282499 [Acyrthosiphon pisum]
Chr01	129844030	missense_variant	Chr01.g04957	XP_001943941.2 legumain [Acyrthosiphon pisum]
Chr01	129908383	synonymous_variant	Chr01.g04961	KAE9528667.1 hypothetical protein AGLY_012242 [Aphis glycines]
Chr01	129918034	intergenic_region	Chr01.g04961-Chr01.g04962	KAE9528667.1 hypothetical protein AGLY_012242 [Aphis glycines]
Chr01	129999322	synonymous_variant	Chr01.g04966	XP_015367857.1 PREDICTED: uncharacterized protein LOC107164519 [Diuraphis noxia]
Chr01	129999646	3_prime_UTR_variant	Chr01.g04966	XP_015367857.1 PREDICTED: uncharacterized protein LOC107164519 [Diuraphis noxia]
Chr01	130042633	intergenic_region	Chr01.g04968-Chr01.g04969	XP_001948447.1 uncharacterized protein LOC100164796 [Acyrthosiphon pisum]
Chr01	130092979	intron_variant	Chr01.g04969	XP_001948491.2 uncharacterized protein LOC100162711 [Acyrthosiphon pisum]
Chr01	130121247	intron_variant	Chr01.g04969	XP_001948491.2 uncharacterized protein LOC100162711 [Acyrthosiphon pisum]
Chr01	130121465	intron_variant	Chr01.g04969	XP_001948491.2 uncharacterized protein LOC100162711 [Acyrthosiphon pisum]
Chr01	130123442	intron_variant	Chr01.g04969	XP_001948491.2 uncharacterized protein LOC100162711 [Acyrthosiphon pisum]
Chr01	130152923	synonymous_variant	Chr01.g04971	XP_001948010.1 transmembrane channel-like protein 7 [Acyrthosiphon pisum]
Chr01	130157322	intergenic_region	Chr01.g04971-Chr01.g04972	XP_001948010.1 transmembrane channel-like protein 7 [Acyrthosiphon pisum]
Chr01	131085393	3_prime_UTR_variant	Chr01.g05065	XP_022173736.1 protein wntless [Myzus persicae]
Chr01	131088706	intron_variant	Chr01.g05065	XP_022173736.1 protein wntless [Myzus persicae]
Chr01	131088977	intron_variant	Chr01.g05065	XP_022173736.1 protein wntless [Myzus persicae]
Chr01	131089573	intron_variant	Chr01.g05065	XP_022173736.1 protein wntless [Myzus persicae]
Chr01	131093615	synonymous_variant	Chr01.g05065	XP_022173736.1 protein wntless [Myzus persicae]
Chr01	131117691	intron_variant	Chr01.g05067	NP_001192099.1 aspartyl-tRNA synthetase, mitochondrial [Acyrthosiphon pisum]
Chr01	131307539	intergenic_region	Chr01.g05069-Chr01.g05070	XP_001944193.1 serine/threonine-protein kinase nekl-3-like isoform X2 [Acyrthosiphon pisum]
Chr01	131343894	intergenic_region	Chr01.g05072-Chr01.g05073	XP_016663497.1 uncharacterized protein LOC107884909 [Acyrthosiphon pisum]
Chr01	132208207	synonymous_variant	Chr01.g05129	XP_015367874.1 PREDICTED: uncharacterized protein LOC107164535 isoform X1 [Diuraphis noxia]
Chr01	132251018	intron_variant	Chr01.g05131	XP_008178841.1 filamin-A isoform X2 [Acyrthosiphon pisum]
Chr01	132260530	intron_variant	Chr01.g05131	XP_008178841.1 filamin-A isoform X2 [Acyrthosiphon pisum]
Chr01	132269866	intron_variant	Chr01.g05131	XP_008178841.1 filamin-A isoform X2 [Acyrthosiphon pisum]
Chr01	132305340	missense_variant	Chr01.g05131	XP_008178841.1 filamin-A isoform X2 [Acyrthosiphon pisum]
Chr01	132309755	synonymous_variant	Chr01.g05131	XP_008178841.1 filamin-A isoform X2 [Acyrthosiphon pisum]
Chr01	132349356	intron_variant	Chr01.g05131	XP_008178841.1 filamin-A isoform X2 [Acyrthosiphon pisum]
Chr01	132441458	intergenic_region	Chr01.g05134-Chr01.g05135	XP_027851197.1 cathepsin B-like [Aphis gossypii]
Chr01	132441570	intergenic_region	Chr01.g05134-Chr01.g05135	XP_027851197.1 cathepsin B-like [Aphis gossypii]
Chr01	132442989	intergenic_region	Chr01.g05134-Chr01.g05135	XP_027851197.1 cathepsin B-like [Aphis gossypii]
Chr01	132445736	intergenic_region	Chr01.g05134-Chr01.g05135	XP_027851197.1 cathepsin B-like [Aphis gossypii]
Chr01	132446145	intergenic_region	Chr01.g05134-Chr01.g05135	XP_027851197.1 cathepsin B-like [Aphis gossypii]
Chr01	132553744	intron_variant	Chr01.g05136	XP_003241682.1 E3 ubiquitin-protein ligase MARCH2-like isoform X2 [Acyrthosiphon pisum]
Chr01	132585494	intergenic_region	Chr01.g05138-Chr01.g05139	XP_029341685.1 uncharacterized protein LOC100569295 isoform X4 [Acyrthosiphon pisum]
Chr01	132618221	intergenic_region	Chr01.g05139-Chr01.g05140	XP_029341685.1 uncharacterized protein LOC100569295 isoform X4 [Acyrthosiphon pisum]
Chr01	132628319	intergenic_region	Chr01.g05140-Chr01.g05141	XP_022160914.1 uncharacterized protein LOC111027018 isoform X3 [Myzus persicae]
Chr01	132648218	intergenic_region	Chr01.g05141-Chr01.g05142	XP_022174558.1 uncharacterized protein LOC111036733 [Myzus persicae]
Chr01	132654479	5_prime_UTR_variant	Chr01.g05142	XP_008178829.1 DDB1- and CUL4-associated factor 7 [Acyrthosiphon pisum]
Chr01	132698692	intergenic_region	Chr01.g05143-Chr01.g05144	XP_001948147.2 E3 SUMO-protein ligase PIAS2-like [Acyrthosiphon pisum]
Chr01	132736521	intergenic_region	Chr01.g05144-Chr01.g05145	XP_016656502.2 calcium/calmodulin-dependent protein kinase type 1 isoform X2 [Acyrthosiphon pisum]
Chr01	132737843	intergenic_region	Chr01.g05144-Chr01.g05145	XP_008178822.2 calcium/calmodulin-dependent protein kinase type 1 isoform X3 [Acyrthosiphon pisum]
Chr01	132738102	intergenic_region	Chr01.g05144-Chr01.g05145	XP_008178822.2 calcium/calmodulin-dependent protein kinase type 1 isoform X3 [Acyrthosiphon pisum]
Chr01	132788939	intron_variant	Chr01.g05145	XP_008178822.2 calcium/calmodulin-dependent protein kinase type 1 isoform X3 [Acyrthosiphon pisum]
Chr01	132792044	intron_variant	Chr01.g05145	XP_008178822.2 calcium/calmodulin-dependent protein kinase type 1 isoform X3 [Acyrthosiphon pisum]
Chr01	132792646	intron_variant	Chr01.g05145	XP_008178822.2 calcium/calmodulin-dependent protein kinase type 1 isoform X3 [Acyrthosiphon pisum]
Chr01	132818933	intron_variant	Chr01.g05145	XP_008178822.2 calcium/calmodulin-dependent protein kinase type 1 isoform X3 [Acyrthosiphon pisum]
Chr01	132833402	intron_variant	Chr01.g05145	XP_008178822.2 calcium/calmodulin-dependent protein kinase type 1 isoform X3 [Acyrthosiphon pisum]
Chr01	132833695	intron_variant	Chr01.g05145	XP_008178822.2 calcium/calmodulin-dependent protein kinase type 1 isoform X3 [Acyrthosiphon pisum]
Chr01	132834317	intron_variant	Chr01.g05145	XP_008178822.2 calcium/calmodulin-dependent protein kinase type 1 isoform X3 [Acyrthosiphon pisum]
Chr01	132879713	intron_variant	Chr01.g05145	XP_008178822.2 calcium/calmodulin-dependent protein kinase type 1 isoform X3 [Acyrthosiphon pisum]
Chr01	132879764	intron_variant	Chr01.g05145	XP_008178822.2 calcium/calmodulin-dependent protein kinase type 1 isoform X3 [Acyrthosiphon pisum]
Chr01	132898987	intron_variant	Chr01.g05145	XP_008178822.2 calcium/calmodulin-dependent protein kinase type 1 isoform X3 [Acyrthosiphon pisum]
Chr01	132902759	intron_variant	Chr01.g05145	XP_008178822.2 calcium/calmodulin-dependent protein kinase type 1 isoform X3 [Acyrthosiphon pisum]
Chr01	132931857	intron_variant	Chr01.g05145	XP_008178822.2 calcium/calmodulin-dependent protein kinase type 1 isoform X3 [Acyrthosiphon pisum]
Chr01	132937393	intron_variant	Chr01.g05145	XP_008178822.2 calcium/calmodulin-dependent protein kinase type 1 isoform X3 [Acyrthosiphon pisum]
Chr01	132945396	intron_variant	Chr01.g05145	XP_008178822.2 calcium/calmodulin-dependent protein kinase type 1 isoform X3 [Acyrthosiphon pisum]
Chr01	132963396	intron_variant	Chr01.g05145	XP_008178822.2 calcium/calmodulin-dependent protein kinase type 1 isoform X3 [Acyrthosiphon pisum]
Chr01	132975616	intron_variant	Chr01.g05145	XP_008178822.2 calcium/calmodulin-dependent protein kinase type 1 isoform X3 [Acyrthosiphon pisum]
Chr01	132977039	intron_variant	Chr01.g05145	XP_008178822.2 calcium/calmodulin-dependent protein kinase type 1 isoform X3 [Acyrthosiphon pisum]
Chr01	133008307	intron_variant	Chr01.g05145	XP_008178822.2 calcium/calmodulin-dependent protein kinase type 1 isoform X3 [Acyrthosiphon pisum]
Chr01	133022119	intron_variant	Chr01.g05145	XP_008178822.2 calcium/calmodulin-dependent protein kinase type 1 isoform X3 [Acyrthosiphon pisum]
Chr01	133023327	intron_variant	Chr01.g05145	XP_008178822.2 calcium/calmodulin-dependent protein kinase type 1 isoform X3 [Acyrthosiphon pisum]
Chr01	133023522	intron_variant	Chr01.g05145	XP_008178822.2 calcium/calmodulin-dependent protein kinase type 1 isoform X3 [Acyrthosiphon pisum]
Chr01	133026200	intron_variant	Chr01.g05145	XP_008178822.2 calcium/calmodulin-dependent protein kinase type 1 isoform X3 [Acyrthosiphon pisum]
Chr01	133028485	intron_variant	Chr01.g05145	XP_008178822.2 calcium/calmodulin-dependent protein kinase type 1 isoform X3 [Acyrthosiphon pisum]
Chr01	133029362	intron_variant	Chr01.g05145	XP_008178822.2 calcium/calmodulin-dependent protein kinase type 1 isoform X3 [Acyrthosiphon pisum]
Chr01	133069853	intron_variant	Chr01.g05145	XP_008178822.2 calcium/calmodulin-dependent protein kinase type 1 isoform X3 [Acyrthosiphon pisum]
Chr01	133083535	intron_variant	Chr01.g05145	XP_008178822.2 calcium/calmodulin-dependent protein kinase type 1 isoform X3 [Acyrthosiphon pisum]
Chr01	133084857	intron_variant	Chr01.g05145	XP_008178822.2 calcium/calmodulin-dependent protein kinase type 1 isoform X3 [Acyrthosiphon pisum]
Chr01	133084945	intron_variant	Chr01.g05145	XP_008178822.2 calcium/calmodulin-dependent protein kinase type 1 isoform X3 [Acyrthosiphon pisum]
Chr01	133089560	intron_variant	Chr01.g05145	XP_008178822.2 calcium/calmodulin-dependent protein kinase type 1 isoform X3 [Acyrthosiphon pisum]
Chr01	133243412	intergenic_region	Chr01.g05149-Chr01.g05150	XP_025407643.1 uncharacterized protein LOC112681612, partial [Sipha flava]
Chr01	133484648	missense_variant	Chr01.g05173	KAE9523115.1 hypothetical protein AGLY_016483 [Aphis glycines]
Chr01	133665618	missense_variant	Chr01.g05187	KAF0709525.1 protein ALP1-like [Aphis craccivora]
Chr01	133994642	intron_variant	Chr01.g05199
Chr01	134081355	intergenic_region	Chr01.g05199-Chr01.g05200
Chr01	134135243	missense_variant	Chr01.g05201	XP_029341675.1 mucin-22 [Acyrthosiphon pisum]
Chr01	140885023	intergenic_region	Chr01.g05561-Chr01.g05562	XP_022179034.1 protein ANTAGONIST OF LIKE HETEROCHROMATIN PROTEIN 1-like [Myzus persicae]
Chr01	140885025	intergenic_region	Chr01.g05561-Chr01.g05562	XP_022179034.1 protein ANTAGONIST OF LIKE HETEROCHROMATIN PROTEIN 1-like [Myzus persicae]
Chr01	140886816	intergenic_region	Chr01.g05561-Chr01.g05562	XP_022179034.1 protein ANTAGONIST OF LIKE HETEROCHROMATIN PROTEIN 1-like [Myzus persicae]
Chr01	140887439	intergenic_region	Chr01.g05561-Chr01.g05562	KAF0726399.1 protein ANTAGONIST OF LIKE HETEROCHROMATIN PROTEIN 1-like, partial [Aphis craccivora]
Chr01	147716185	intergenic_region	Chr01.g06048-Chr01.g06049	XP_029347795.1 uncharacterized protein LOC115034623 [Acyrthosiphon pisum]
Chr02	429528	intron_variant	Chr02.g06376	XP_001944591.2 UDP-glucuronosyltransferase 2B15 [Acyrthosiphon pisum]
Chr02	675116	intergenic_region	Chr02.g06379-Chr02.g06380	KAF0767286.1 DUF4455 domain-containing protein [Aphis craccivora]
Chr02	675656	intergenic_region	Chr02.g06379-Chr02.g06380	KAF0767286.1 DUF4455 domain-containing protein [Aphis craccivora]
Chr02	676086	intergenic_region	Chr02.g06379-Chr02.g06380	KAF0767286.1 DUF4455 domain-containing protein [Aphis craccivora]
Chr02	695934	intergenic_region	Chr02.g06379-Chr02.g06380	KAF0767286.1 DUF4455 domain-containing protein [Aphis craccivora]
Chr02	700670	intergenic_region	Chr02.g06379-Chr02.g06380	KAF0767286.1 DUF4455 domain-containing protein [Aphis craccivora]
Chr02	711748	intergenic_region	Chr02.g06380-Chr02.g06381
Chr02	712047	intergenic_region	Chr02.g06380-Chr02.g06381
Chr02	719003	missense_variant	Chr02.g06381	XP_022172265.1 zinc finger protein 512B-like [Myzus persicae]
Chr02	727362	intergenic_region	Chr02.g06381-Chr02.g06382	XP_022172265.1 zinc finger protein 512B-like [Myzus persicae]
Chr02	736864	intergenic_region	Chr02.g06381-Chr02.g06382	XP_022172265.1 zinc finger protein 512B-like [Myzus persicae]
Chr02	737186	intergenic_region	Chr02.g06381-Chr02.g06382	XP_022172265.1 zinc finger protein 512B-like [Myzus persicae]
Chr02	746542	3_prime_UTR_variant	Chr02.g06382	XP_015367055.1 PREDICTED: repetitive proline-rich cell wall protein 2-like [Diuraphis noxia]
Chr02	800367	intergenic_region	Chr02.g06382-Chr02.g06383	XP_015367055.1 PREDICTED: repetitive proline-rich cell wall protein 2-like [Diuraphis noxia]
Chr02	811482	intergenic_region	Chr02.g06382-Chr02.g06383	XP_003245859.1 netrin receptor UNC5C isoform X1 [Acyrthosiphon pisum]
Chr02	811656	intergenic_region	Chr02.g06382-Chr02.g06383	XP_003245859.1 netrin receptor UNC5C isoform X1 [Acyrthosiphon pisum]
Chr02	819929	intron_variant	Chr02.g06383	XP_003245859.1 netrin receptor UNC5C isoform X1 [Acyrthosiphon pisum]
Chr02	834752	intron_variant	Chr02.g06383	XP_003245859.1 netrin receptor UNC5C isoform X1 [Acyrthosiphon pisum]
Chr02	849622	intron_variant	Chr02.g06383	XP_003245859.1 netrin receptor UNC5C isoform X1 [Acyrthosiphon pisum]
Chr02	850921	intron_variant	Chr02.g06383	XP_003245859.1 netrin receptor UNC5C isoform X1 [Acyrthosiphon pisum]
Chr02	859437	intron_variant	Chr02.g06383	XP_003245859.1 netrin receptor UNC5C isoform X1 [Acyrthosiphon pisum]
Chr02	874120	intron_variant	Chr02.g06383	XP_003245859.1 netrin receptor UNC5C isoform X1 [Acyrthosiphon pisum]
Chr02	874152	intron_variant	Chr02.g06383	XP_003245859.1 netrin receptor UNC5C isoform X1 [Acyrthosiphon pisum]
Chr02	874198	intron_variant	Chr02.g06383	XP_003245859.1 netrin receptor UNC5C isoform X1 [Acyrthosiphon pisum]
Chr02	887163	intron_variant	Chr02.g06383	XP_003245859.1 netrin receptor UNC5C isoform X1 [Acyrthosiphon pisum]
Chr02	915651	intergenic_region	Chr02.g06383-Chr02.g06384	XP_003245859.1 netrin receptor UNC5C isoform X1 [Acyrthosiphon pisum]
Chr02	917643	intergenic_region	Chr02.g06383-Chr02.g06384	XP_003245859.1 netrin receptor UNC5C isoform X1 [Acyrthosiphon pisum]
Chr02	935787	intergenic_region	Chr02.g06384-Chr02.g06385	XP_003245134.1 peroxisome biogenesis factor 2 isoform X1 [Acyrthosiphon pisum]
Chr02	959087	synonymous_variant	Chr02.g06386	NP_001153873.1 aspartyl-tRNA synthetase [Acyrthosiphon pisum]
Chr02	1044188	synonymous_variant	Chr02.g06391	XP_022172282.1 transcription factor HES-1-B [Myzus persicae]
Chr02	1097488	intergenic_region	Chr02.g06392-Chr02.g06393	NP_001156148.1 rer1 protein-like [Acyrthosiphon pisum]
Chr02	1114107	intergenic_region	Chr02.g06393-Chr02.g06394	XP_016661798.1 tip elongation aberrant protein 1 [Acyrthosiphon pisum]
Chr02	1118381	synonymous_variant	Chr02.g06394	XP_016661798.1 tip elongation aberrant protein 1 [Acyrthosiphon pisum]
Chr02	1118534	synonymous_variant	Chr02.g06394	XP_016661798.1 tip elongation aberrant protein 1 [Acyrthosiphon pisum]
Chr02	1161851	synonymous_variant	Chr02.g06397	XP_029343881.1 LOW QUALITY PROTEIN: mediator of RNA polymerase II transcription subunit 12 [Acyrthosiphon pisum]
Chr02	1235793	synonymous_variant	Chr02.g06400	XP_029343883.1 oxysterol-binding protein-related protein 9 isoform X1 [Acyrthosiphon pisum]
Chr02	1250780	synonymous_variant	Chr02.g06402	XP_029342174.1 golgin subfamily A member 6-like protein 22 [Acyrthosiphon pisum]
Chr02	1263930	3_prime_UTR_variant	Chr02.g06403	XP_001947648.1 uncharacterized protein LOC100159988 [Acyrthosiphon pisum]
Chr02	1265053	3_prime_UTR_variant	Chr02.g06403	XP_001947648.1 uncharacterized protein LOC100159988 [Acyrthosiphon pisum]
Chr02	1269396	intergenic_region	Chr02.g06403-Chr02.g06404	XP_001947648.1 uncharacterized protein LOC100159988 [Acyrthosiphon pisum]
Chr02	1274951	intron_variant	Chr02.g06404	XP_001946324.2 histone deacetylase Rpd3 [Acyrthosiphon pisum]
Chr02	1275290	intron_variant	Chr02.g06404	XP_001946324.2 histone deacetylase Rpd3 [Acyrthosiphon pisum]
Chr02	1411119	intron_variant	Chr02.g06405	XP_029343886.1 kinesin-like protein CG14535 isoform X1 [Acyrthosiphon pisum]
Chr02	1411504	intron_variant	Chr02.g06405	XP_029343886.1 kinesin-like protein CG14535 isoform X1 [Acyrthosiphon pisum]
Chr02	1417849	intron_variant	Chr02.g06405	XP_029343886.1 kinesin-like protein CG14535 isoform X1 [Acyrthosiphon pisum]
Chr02	1426476	intron_variant	Chr02.g06405	XP_029343886.1 kinesin-like protein CG14535 isoform X1 [Acyrthosiphon pisum]
Chr02	1443855	intron_variant	Chr02.g06405	XP_029343886.1 kinesin-like protein CG14535 isoform X1 [Acyrthosiphon pisum]
Chr02	1443956	intron_variant	Chr02.g06405	XP_029343886.1 kinesin-like protein CG14535 isoform X1 [Acyrthosiphon pisum]
Chr02	1450731	intron_variant	Chr02.g06405	XP_029343886.1 kinesin-like protein CG14535 isoform X1 [Acyrthosiphon pisum]
Chr02	1454594	intron_variant	Chr02.g06405	XP_029343886.1 kinesin-like protein CG14535 isoform X1 [Acyrthosiphon pisum]
Chr02	1466857	intron_variant	Chr02.g06405	XP_029343886.1 kinesin-like protein CG14535 isoform X1 [Acyrthosiphon pisum]
Chr02	1467052	intron_variant	Chr02.g06405	XP_029343886.1 kinesin-like protein CG14535 isoform X1 [Acyrthosiphon pisum]
Chr02	1469215	intron_variant	Chr02.g06405	XP_029343886.1 kinesin-like protein CG14535 isoform X1 [Acyrthosiphon pisum]
Chr02	1470430	synonymous_variant	Chr02.g06405	XP_029343886.1 kinesin-like protein CG14535 isoform X1 [Acyrthosiphon pisum]
Chr02	1470781	synonymous_variant	Chr02.g06405	XP_029343886.1 kinesin-like protein CG14535 isoform X1 [Acyrthosiphon pisum]
Chr02	1476141	intergenic_region	Chr02.g06405-Chr02.g06406	XP_029343886.1 kinesin-like protein CG14535 isoform X1 [Acyrthosiphon pisum]
Chr02	1607439	intron_variant	Chr02.g06410	XP_003241675.1 protein dachsous [Acyrthosiphon pisum]
Chr02	1610841	intron_variant	Chr02.g06410	XP_003241675.1 protein dachsous [Acyrthosiphon pisum]
Chr02	1611097	intron_variant	Chr02.g06410	XP_003241675.1 protein dachsous [Acyrthosiphon pisum]
Chr02	1611351	intron_variant	Chr02.g06410	XP_003241675.1 protein dachsous [Acyrthosiphon pisum]
Chr02	1618756	intron_variant	Chr02.g06410	XP_003241675.1 protein dachsous [Acyrthosiphon pisum]
Chr02	1622363	intron_variant	Chr02.g06410	XP_003241675.1 protein dachsous [Acyrthosiphon pisum]
Chr02	1633503	intron_variant	Chr02.g06410	XP_003241675.1 protein dachsous [Acyrthosiphon pisum]
Chr02	1635368	intron_variant	Chr02.g06410	XP_003241675.1 protein dachsous [Acyrthosiphon pisum]
Chr02	1635912	intron_variant	Chr02.g06410	XP_003241675.1 protein dachsous [Acyrthosiphon pisum]
Chr02	1636029	intron_variant	Chr02.g06410	XP_003241675.1 protein dachsous [Acyrthosiphon pisum]
Chr02	1639746	intron_variant	Chr02.g06410	XP_003241675.1 protein dachsous [Acyrthosiphon pisum]
Chr02	1643113	intron_variant	Chr02.g06410	XP_003241675.1 protein dachsous [Acyrthosiphon pisum]
Chr02	1645793	intron_variant	Chr02.g06410	XP_003241675.1 protein dachsous [Acyrthosiphon pisum]
Chr02	1645846	intron_variant	Chr02.g06410	XP_003241675.1 protein dachsous [Acyrthosiphon pisum]
Chr02	1675375	intron_variant	Chr02.g06410	XP_003241675.1 protein dachsous [Acyrthosiphon pisum]
Chr02	1675770	intron_variant	Chr02.g06410	XP_003241675.1 protein dachsous [Acyrthosiphon pisum]
Chr02	1677085	intron_variant	Chr02.g06410	XP_003241675.1 protein dachsous [Acyrthosiphon pisum]
Chr02	1700675	missense_variant	Chr02.g06410	XP_003241675.1 protein dachsous [Acyrthosiphon pisum]
Chr02	1707795	synonymous_variant	Chr02.g06410	XP_003241675.1 protein dachsous [Acyrthosiphon pisum]
Chr02	1717801	intron_variant	Chr02.g06410	XP_003241675.1 protein dachsous [Acyrthosiphon pisum]
Chr02	1731279	synonymous_variant	Chr02.g06410	XP_003241675.1 protein dachsous [Acyrthosiphon pisum]
Chr02	1731890	intergenic_region	Chr02.g06410-Chr02.g06411	XP_003241675.1 protein dachsous [Acyrthosiphon pisum]
Chr02	1770817	synonymous_variant	Chr02.g06414	XP_022177500.1 E3 ubiquitin-protein ligase NRDP1 [Myzus persicae]
Chr02	1774421	intron_variant	Chr02.g06414	XP_022177500.1 E3 ubiquitin-protein ligase NRDP1 [Myzus persicae]
Chr02	1774486	intron_variant	Chr02.g06414	XP_022177500.1 E3 ubiquitin-protein ligase NRDP1 [Myzus persicae]
Chr02	1776125	intron_variant	Chr02.g06414	XP_022177500.1 E3 ubiquitin-protein ligase NRDP1 [Myzus persicae]
Chr02	1781406	intron_variant	Chr02.g06414	XP_022177500.1 E3 ubiquitin-protein ligase NRDP1 [Myzus persicae]
Chr02	1792903	5_prime_UTR_premature_start_codon_gain_variant	Chr02.g06415	XP_001942820.2 type I inositol 3,4-bisphosphate 4-phosphatase isoform X1 [Acyrthosiphon pisum]
Chr02	1802142	intergenic_region	Chr02.g06415-Chr02.g06416	XP_001942820.2 type I inositol 3,4-bisphosphate 4-phosphatase isoform X1 [Acyrthosiphon pisum]
Chr02	1802397	intergenic_region	Chr02.g06415-Chr02.g06416	XP_001942820.2 type I inositol 3,4-bisphosphate 4-phosphatase isoform X1 [Acyrthosiphon pisum]
Chr02	1802553	intergenic_region	Chr02.g06415-Chr02.g06416	XP_001942820.2 type I inositol 3,4-bisphosphate 4-phosphatase isoform X1 [Acyrthosiphon pisum]
Chr02	1802882	intergenic_region	Chr02.g06415-Chr02.g06416	XP_001942820.2 type I inositol 3,4-bisphosphate 4-phosphatase isoform X1 [Acyrthosiphon pisum]
Chr02	1803333	intergenic_region	Chr02.g06415-Chr02.g06416	XP_001942820.2 type I inositol 3,4-bisphosphate 4-phosphatase isoform X1 [Acyrthosiphon pisum]
Chr02	1806851	synonymous_variant	Chr02.g06416	XP_003241670.1 transcription initiation factor TFIID subunit 1 isoform X1 [Acyrthosiphon pisum]
Chr02	1809200	synonymous_variant	Chr02.g06416	XP_003241670.1 transcription initiation factor TFIID subunit 1 isoform X1 [Acyrthosiphon pisum]
Chr02	1815289	intron_variant	Chr02.g06416	XP_001942923.1 uncharacterized protein LOC100169379 [Acyrthosiphon pisum]
Chr02	1815667	intron_variant	Chr02.g06416	XP_001942923.1 uncharacterized protein LOC100169379 [Acyrthosiphon pisum]
Chr02	1817148	synonymous_variant	Chr02.g06416	XP_003241670.1 transcription initiation factor TFIID subunit 1 isoform X1 [Acyrthosiphon pisum]
Chr02	1820830	missense_variant	Chr02.g06417	XP_001942923.1 uncharacterized protein LOC100169379 [Acyrthosiphon pisum]
Chr02	1823669	intergenic_region	Chr02.g06417-Chr02.g06418	XP_003241670.1 transcription initiation factor TFIID subunit 1 isoform X1 [Acyrthosiphon pisum]
Chr02	1830801	3_prime_UTR_variant	Chr02.g06418	XP_001943170.1 bifunctional lycopene cyclase/phytoene synthase [Acyrthosiphon pisum]
Chr02	1830924	3_prime_UTR_variant	Chr02.g06418	XP_001943170.1 bifunctional lycopene cyclase/phytoene synthase [Acyrthosiphon pisum]
Chr02	1831591	synonymous_variant	Chr02.g06418	XP_001943170.1 bifunctional lycopene cyclase/phytoene synthase [Acyrthosiphon pisum]
Chr02	1831679	synonymous_variant	Chr02.g06418	XP_001943170.1 bifunctional lycopene cyclase/phytoene synthase [Acyrthosiphon pisum]
Chr02	1849846	intron_variant	Chr02.g06418	XP_001943170.1 bifunctional lycopene cyclase/phytoene synthase [Acyrthosiphon pisum]
Chr02	1888341	intergenic_region	Chr02.g06420-Chr02.g06421	XP_001950787.1 bifunctional lycopene cyclase/phytoene synthase [Acyrthosiphon pisum]
Chr02	2020335	synonymous_variant	Chr02.g06429	XP_022180716.1 sodium/calcium exchanger 3 [Myzus persicae]
Chr02	2061284	5_prime_UTR_variant	Chr02.g06433	XP_008182786.1 YTH domain-containing protein 1 isoform X2 [Acyrthosiphon pisum]
Chr02	2076522	synonymous_variant	Chr02.g06435	KAE9524723.1 hypothetical protein AGLY_014773 [Aphis glycines]
Chr02	2076709	synonymous_variant	Chr02.g06435	KAE9524723.1 hypothetical protein AGLY_014773 [Aphis glycines]
Chr02	2195644	intron_variant	Chr02.g06441	XP_026808192.1 disintegrin and metalloproteinase domain-containing protein 11 isoform X1 [Rhopalosiphum maidis]
Chr02	2196798	intron_variant	Chr02.g06441	XP_026808192.1 disintegrin and metalloproteinase domain-containing protein 11 isoform X1 [Rhopalosiphum maidis]
Chr02	2222995	intron_variant	Chr02.g06441	XP_026808192.1 disintegrin and metalloproteinase domain-containing protein 11 isoform X1 [Rhopalosiphum maidis]
Chr02	2225816	intron_variant	Chr02.g06441	XP_026808192.1 disintegrin and metalloproteinase domain-containing protein 11 isoform X1 [Rhopalosiphum maidis]
Chr02	2227551	intron_variant	Chr02.g06441	XP_026808192.1 disintegrin and metalloproteinase domain-containing protein 11 isoform X1 [Rhopalosiphum maidis]
Chr02	2242903	intron_variant	Chr02.g06441	XP_026808192.1 disintegrin and metalloproteinase domain-containing protein 11 isoform X1 [Rhopalosiphum maidis]
Chr02	2243040	intron_variant	Chr02.g06441	XP_026808192.1 disintegrin and metalloproteinase domain-containing protein 11 isoform X1 [Rhopalosiphum maidis]
Chr02	2245785	intron_variant	Chr02.g06441	XP_026808192.1 disintegrin and metalloproteinase domain-containing protein 11 isoform X1 [Rhopalosiphum maidis]
Chr02	2262927	intron_variant	Chr02.g06441	XP_026808192.1 disintegrin and metalloproteinase domain-containing protein 11 isoform X1 [Rhopalosiphum maidis]
Chr02	2266538	intron_variant	Chr02.g06441	XP_026808192.1 disintegrin and metalloproteinase domain-containing protein 11 isoform X1 [Rhopalosiphum maidis]
Chr02	2266599	intron_variant	Chr02.g06441	XP_026808192.1 disintegrin and metalloproteinase domain-containing protein 11 isoform X1 [Rhopalosiphum maidis]
Chr02	2266837	intron_variant	Chr02.g06441	XP_026808192.1 disintegrin and metalloproteinase domain-containing protein 11 isoform X1 [Rhopalosiphum maidis]
Chr02	2275304	intron_variant	Chr02.g06441	XP_026808192.1 disintegrin and metalloproteinase domain-containing protein 11 isoform X1 [Rhopalosiphum maidis]
Chr02	2286805	intron_variant	Chr02.g06441	XP_026808192.1 disintegrin and metalloproteinase domain-containing protein 11 isoform X1 [Rhopalosiphum maidis]
Chr02	2290722	intron_variant	Chr02.g06441	XP_026808192.1 disintegrin and metalloproteinase domain-containing protein 11 isoform X1 [Rhopalosiphum maidis]
Chr02	2306232	intron_variant	Chr02.g06441	XP_026808192.1 disintegrin and metalloproteinase domain-containing protein 11 isoform X1 [Rhopalosiphum maidis]
Chr02	2307771	intron_variant	Chr02.g06441	XP_026808192.1 disintegrin and metalloproteinase domain-containing protein 11 isoform X1 [Rhopalosiphum maidis]
Chr02	2316482	intron_variant	Chr02.g06441	XP_026808192.1 disintegrin and metalloproteinase domain-containing protein 11 isoform X1 [Rhopalosiphum maidis]
Chr02	2317059	intron_variant	Chr02.g06441	XP_026808192.1 disintegrin and metalloproteinase domain-containing protein 11 isoform X1 [Rhopalosiphum maidis]
Chr02	2333747	intron_variant	Chr02.g06441	XP_026808192.1 disintegrin and metalloproteinase domain-containing protein 11 isoform X1 [Rhopalosiphum maidis]
Chr02	2348528	intron_variant	Chr02.g06441	XP_026808192.1 disintegrin and metalloproteinase domain-containing protein 11 isoform X1 [Rhopalosiphum maidis]
Chr02	2425847	intron_variant	Chr02.g06441	XP_026808192.1 disintegrin and metalloproteinase domain-containing protein 11 isoform X1 [Rhopalosiphum maidis]
Chr02	2425938	intron_variant	Chr02.g06441	XP_026808192.1 disintegrin and metalloproteinase domain-containing protein 11 isoform X1 [Rhopalosiphum maidis]
Chr02	2427960	intron_variant	Chr02.g06441	XP_026808192.1 disintegrin and metalloproteinase domain-containing protein 11 isoform X1 [Rhopalosiphum maidis]
Chr02	2429063	intron_variant	Chr02.g06441	XP_026808192.1 disintegrin and metalloproteinase domain-containing protein 11 isoform X1 [Rhopalosiphum maidis]
Chr02	2429215	intron_variant	Chr02.g06441	XP_026808192.1 disintegrin and metalloproteinase domain-containing protein 11 isoform X1 [Rhopalosiphum maidis]
Chr02	2452099	intron_variant	Chr02.g06441	XP_026808192.1 disintegrin and metalloproteinase domain-containing protein 11 isoform X1 [Rhopalosiphum maidis]
Chr02	2455354	intergenic_region	Chr02.g06441-Chr02.g06442	XP_026808192.1 disintegrin and metalloproteinase domain-containing protein 11 isoform X1 [Rhopalosiphum maidis]
Chr02	2456396	intergenic_region	Chr02.g06441-Chr02.g06442	XP_026808192.1 disintegrin and metalloproteinase domain-containing protein 11 isoform X1 [Rhopalosiphum maidis]
Chr02	2461037	intergenic_region	Chr02.g06441-Chr02.g06442	XP_026808192.1 disintegrin and metalloproteinase domain-containing protein 11 isoform X1 [Rhopalosiphum maidis]
Chr02	2461084	intergenic_region	Chr02.g06441-Chr02.g06442	XP_026808192.1 disintegrin and metalloproteinase domain-containing protein 11 isoform X1 [Rhopalosiphum maidis]
Chr02	2464148	intergenic_region	Chr02.g06441-Chr02.g06442	XP_016661332.1 cyclin-dependent kinase 11B isoform X2 [Acyrthosiphon pisum]
Chr02	2464796	intergenic_region	Chr02.g06441-Chr02.g06442	XP_016661332.1 cyclin-dependent kinase 11B isoform X2 [Acyrthosiphon pisum]
Chr02	2465193	intergenic_region	Chr02.g06441-Chr02.g06442	XP_016661332.1 cyclin-dependent kinase 11B isoform X2 [Acyrthosiphon pisum]
Chr02	2465694	intergenic_region	Chr02.g06441-Chr02.g06442	XP_016661332.1 cyclin-dependent kinase 11B isoform X2 [Acyrthosiphon pisum]
Chr02	2478803	intron_variant	Chr02.g06443	XP_008184801.1 cyclin-dependent kinase 12 [Acyrthosiphon pisum]
Chr02	2479990	synonymous_variant	Chr02.g06443	XP_008184801.1 cyclin-dependent kinase 12 [Acyrthosiphon pisum]
Chr02	2481532	intergenic_region	Chr02.g06443-Chr02.g06444	XP_001952719.2 ubiquitin carboxyl-terminal hydrolase 47 [Acyrthosiphon pisum]
Chr02	2483926	intergenic_region	Chr02.g06443-Chr02.g06444	XP_001952719.2 ubiquitin carboxyl-terminal hydrolase 47 [Acyrthosiphon pisum]
Chr02	2484094	intergenic_region	Chr02.g06443-Chr02.g06444	XP_001952719.2 ubiquitin carboxyl-terminal hydrolase 47 [Acyrthosiphon pisum]
Chr02	2484392	intergenic_region	Chr02.g06443-Chr02.g06444	XP_001952719.2 ubiquitin carboxyl-terminal hydrolase 47 [Acyrthosiphon pisum]
Chr02	2580552	synonymous_variant	Chr02.g06450	XP_022163053.1 L-xylulose reductase-like [Myzus persicae]
Chr02	2589666	intergenic_region	Chr02.g06450-Chr02.g06451	XP_022163053.1 L-xylulose reductase-like [Myzus persicae]
Chr02	2606973	intergenic_region	Chr02.g06450-Chr02.g06451	XP_022163053.1 L-xylulose reductase-like [Myzus persicae]
Chr02	2608618	intergenic_region	Chr02.g06450-Chr02.g06451	XP_022163053.1 L-xylulose reductase-like [Myzus persicae]
Chr02	2608752	intergenic_region	Chr02.g06450-Chr02.g06451	XP_022163053.1 L-xylulose reductase-like [Myzus persicae]
Chr02	2608756	intergenic_region	Chr02.g06450-Chr02.g06451	XP_022163053.1 L-xylulose reductase-like [Myzus persicae]
Chr02	2608861	intergenic_region	Chr02.g06450-Chr02.g06451	XP_022163053.1 L-xylulose reductase-like [Myzus persicae]
Chr02	2609071	intergenic_region	Chr02.g06450-Chr02.g06451	XP_022163053.1 L-xylulose reductase-like [Myzus persicae]
Chr02	2636020	intergenic_region	Chr02.g06450-Chr02.g06451	XP_022163053.1 L-xylulose reductase-like [Myzus persicae]
Chr02	2636296	intergenic_region	Chr02.g06450-Chr02.g06451	XP_022163053.1 L-xylulose reductase-like [Myzus persicae]
Chr02	2639031	intergenic_region	Chr02.g06450-Chr02.g06451	XP_022163053.1 L-xylulose reductase-like [Myzus persicae]
Chr02	2640717	intergenic_region	Chr02.g06450-Chr02.g06451	XP_022163053.1 L-xylulose reductase-like [Myzus persicae]
Chr02	2650856	intergenic_region	Chr02.g06450-Chr02.g06451	XP_022163053.1 L-xylulose reductase-like [Myzus persicae]
Chr02	2671730	intergenic_region	Chr02.g06450-Chr02.g06451	XP_022163053.1 L-xylulose reductase-like [Myzus persicae]
Chr02	2693775	intergenic_region	Chr02.g06450-Chr02.g06451	XP_022163053.1 L-xylulose reductase-like [Myzus persicae]
Chr02	2698171	intergenic_region	Chr02.g06450-Chr02.g06451	XP_022163053.1 L-xylulose reductase-like [Myzus persicae]
Chr02	2698416	intergenic_region	Chr02.g06450-Chr02.g06451	XP_022163053.1 L-xylulose reductase-like [Myzus persicae]
Chr02	2754584	intergenic_region	Chr02.g06450-Chr02.g06451	XP_022163053.1 L-xylulose reductase-like [Myzus persicae]
Chr02	2764537	intergenic_region	Chr02.g06450-Chr02.g06451	XP_022163053.1 L-xylulose reductase-like [Myzus persicae]
Chr02	2799724	intergenic_region	Chr02.g06450-Chr02.g06451	XP_008190241.1 uncharacterized protein K02A2.6-like [Acyrthosiphon pisum]
Chr02	2800188	intergenic_region	Chr02.g06450-Chr02.g06451	XP_008190241.1 uncharacterized protein K02A2.6-like [Acyrthosiphon pisum]
Chr02	2806429	intergenic_region	Chr02.g06451-Chr02.g06452	XP_008190241.1 uncharacterized protein K02A2.6-like [Acyrthosiphon pisum]
Chr02	2918685	synonymous_variant	Chr02.g06456
Chr02	2948091	intron_variant	Chr02.g06457	XP_003248223.1 matrix metalloproteinase-19 isoform X2 [Acyrthosiphon pisum]
Chr02	2948586	synonymous_variant	Chr02.g06457	XP_003248223.1 matrix metalloproteinase-19 isoform X2 [Acyrthosiphon pisum]
Chr02	2952402	synonymous_variant	Chr02.g06457	XP_003248223.1 matrix metalloproteinase-19 isoform X2 [Acyrthosiphon pisum]
Chr02	2956987	synonymous_variant	Chr02.g06457	XP_003248223.1 matrix metalloproteinase-19 isoform X2 [Acyrthosiphon pisum]
Chr02	3002873	intergenic_region	Chr02.g06457-Chr02.g06458	XP_008183826.1 importin-5 [Acyrthosiphon pisum]
Chr02	3009392	synonymous_variant	Chr02.g06458	XP_008183826.1 importin-5 [Acyrthosiphon pisum]
Chr02	3011185	synonymous_variant	Chr02.g06458	XP_008183826.1 importin-5 [Acyrthosiphon pisum]
Chr02	3018989	missense_variant	Chr02.g06460	XP_022163054.1 thioredoxin, mitochondrial [Myzus persicae]
Chr02	3030442	intron_variant	Chr02.g06462	XP_022163059.1 RRP15-like protein [Myzus persicae]
Chr02	3053655	missense_variant	Chr02.g06464	XP_029343905.1 DNA repair protein RAD50 isoform X3 [Acyrthosiphon pisum]
Chr02	3064922	intron_variant	Chr02.g06465	XP_022182569.1 testis-expressed protein 2 isoform X1 [Myzus persicae]
Chr02	3067544	5_prime_UTR_variant	Chr02.g06465	XP_022182569.1 testis-expressed protein 2 isoform X1 [Myzus persicae]
Chr02	3093847	intergenic_region	Chr02.g06465-Chr02.g06466	XP_022182569.1 testis-expressed protein 2 isoform X1 [Myzus persicae]
Chr02	3108100	3_prime_UTR_variant	Chr02.g06466	XP_003245045.1 uncharacterized protein LOC100573017 [Acyrthosiphon pisum]
Chr02	3133917	intron_variant	Chr02.g06466	XP_003245045.1 uncharacterized protein LOC100573017 [Acyrthosiphon pisum]
Chr02	3134068	intron_variant	Chr02.g06466	XP_003245045.1 uncharacterized protein LOC100573017 [Acyrthosiphon pisum]
Chr02	3185929	synonymous_variant	Chr02.g06467	XP_001948329.1 facilitated trehalose transporter Tret1-2 homolog isoform X1 [Acyrthosiphon pisum]
Chr02	3186085	3_prime_UTR_variant	Chr02.g06467	XP_001948329.1 facilitated trehalose transporter Tret1-2 homolog isoform X1 [Acyrthosiphon pisum]
Chr02	3267529	missense_variant	Chr02.g06471
Chr02	3268260	intron_variant	Chr02.g06470
Chr02	3325952	synonymous_variant	Chr02.g06474	XP_001951879.1 uncharacterized protein LOC100161729 [Acyrthosiphon pisum]
Chr02	3349975	intergenic_region	Chr02.g06475-Chr02.g06476	XP_016665048.1 xanthine dehydrogenase [Acyrthosiphon pisum]
Chr02	3351381	intergenic_region	Chr02.g06475-Chr02.g06476	XP_016665048.1 xanthine dehydrogenase [Acyrthosiphon pisum]
Chr02	3389591	intron_variant	Chr02.g06476	KAE9545104.1 hypothetical protein AGLY_000647 [Aphis glycines]
Chr02	3391409	intron_variant	Chr02.g06477	XP_022182536.1 spectrin beta chain isoform X1 [Myzus persicae]
Chr02	3423643	intron_variant	Chr02.g06481	XP_001951525.1 TRPL translocation defect protein 14 [Acyrthosiphon pisum]
Chr02	3473036	intron_variant	Chr02.g06483	XP_001951325.2 uncharacterized protein LOC100167745 [Acyrthosiphon pisum]
Chr02	3654085	intergenic_region	Chr02.g06490-Chr02.g06491	XP_001947868.2 scoloptoxin SSD14 [Acyrthosiphon pisum]
Chr02	3705067	missense_variant	Chr02.g06493	NP_001313548.1 uncharacterized protein LOC100159087 precursor [Acyrthosiphon pisum]
Chr02	3748142	intergenic_region	Chr02.g06497-Chr02.g06498	XP_016663972.1 nitric oxide synthase, salivary gland isoform X1 [Acyrthosiphon pisum]
Chr02	3748403	intergenic_region	Chr02.g06497-Chr02.g06498	XP_016663972.1 nitric oxide synthase, salivary gland isoform X1 [Acyrthosiphon pisum]
Chr02	3906142	intron_variant	Chr02.g06499	XP_029343920.1 regulating synaptic membrane exocytosis protein 1 isoform X1 [Acyrthosiphon pisum]
Chr02	3909236	intron_variant	Chr02.g06499	XP_029343920.1 regulating synaptic membrane exocytosis protein 1 isoform X1 [Acyrthosiphon pisum]
Chr02	3912406	intron_variant	Chr02.g06499	XP_029343920.1 regulating synaptic membrane exocytosis protein 1 isoform X1 [Acyrthosiphon pisum]
Chr02	3936976	intron_variant	Chr02.g06499	XP_029343920.1 regulating synaptic membrane exocytosis protein 1 isoform X1 [Acyrthosiphon pisum]
Chr02	3940887	intron_variant	Chr02.g06499	XP_029343920.1 regulating synaptic membrane exocytosis protein 1 isoform X1 [Acyrthosiphon pisum]
Chr02	3956073	synonymous_variant	Chr02.g06499	XP_029343920.1 regulating synaptic membrane exocytosis protein 1 isoform X1 [Acyrthosiphon pisum]
Chr02	3976764	intergenic_region	Chr02.g06499-Chr02.g06500	XP_029343920.1 regulating synaptic membrane exocytosis protein 1 isoform X1 [Acyrthosiphon pisum]
Chr02	3980227	intergenic_region	Chr02.g06499-Chr02.g06500	XP_029343920.1 regulating synaptic membrane exocytosis protein 1 isoform X1 [Acyrthosiphon pisum]
Chr02	4004253	intergenic_region	Chr02.g06499-Chr02.g06500	XP_029343920.1 regulating synaptic membrane exocytosis protein 1 isoform X1 [Acyrthosiphon pisum]
Chr02	4018904	intergenic_region	Chr02.g06499-Chr02.g06500	XP_029343920.1 regulating synaptic membrane exocytosis protein 1 isoform X1 [Acyrthosiphon pisum]
Chr02	4451004	intron_variant	Chr02.g06525	XP_003244884.1 uncharacterized protein LOC100570919 [Acyrthosiphon pisum]
Chr02	4488137	intergenic_region	Chr02.g06525-Chr02.g06526	XP_003244884.1 uncharacterized protein LOC100570919 [Acyrthosiphon pisum]
Chr02	4499770	intergenic_region	Chr02.g06525-Chr02.g06526	XP_003244884.1 uncharacterized protein LOC100570919 [Acyrthosiphon pisum]
Chr02	4507633	intergenic_region	Chr02.g06525-Chr02.g06526	XP_003244884.1 uncharacterized protein LOC100570919 [Acyrthosiphon pisum]
Chr02	4508272	intergenic_region	Chr02.g06525-Chr02.g06526	XP_003244884.1 uncharacterized protein LOC100570919 [Acyrthosiphon pisum]
Chr02	4511125	intergenic_region	Chr02.g06525-Chr02.g06526	XP_003244884.1 uncharacterized protein LOC100570919 [Acyrthosiphon pisum]
Chr02	4535189	intron_variant	Chr02.g06526	XP_029343937.1 allatostatin-A receptor-like [Acyrthosiphon pisum]
Chr02	4552055	intron_variant	Chr02.g06526	XP_029343937.1 allatostatin-A receptor-like [Acyrthosiphon pisum]
Chr02	4559284	intron_variant	Chr02.g06526	XP_029343937.1 allatostatin-A receptor-like [Acyrthosiphon pisum]
Chr02	4572878	intron_variant	Chr02.g06526	XP_029343937.1 allatostatin-A receptor-like [Acyrthosiphon pisum]
Chr02	4579413	intron_variant	Chr02.g06526	XP_029343937.1 allatostatin-A receptor-like [Acyrthosiphon pisum]
Chr02	4605111	intron_variant	Chr02.g06526	XP_029343937.1 allatostatin-A receptor-like [Acyrthosiphon pisum]
Chr02	4635733	intron_variant	Chr02.g06526	XP_029343937.1 allatostatin-A receptor-like [Acyrthosiphon pisum]
Chr02	4642554	intron_variant	Chr02.g06526	XP_029343937.1 allatostatin-A receptor-like [Acyrthosiphon pisum]
Chr02	4654252	intergenic_region	Chr02.g06526-Chr02.g06527	XP_029343937.1 allatostatin-A receptor-like [Acyrthosiphon pisum]
Chr02	4700489	intron_variant	Chr02.g06527	XP_003244885.1 unconventional myosin-XV isoform X3 [Acyrthosiphon pisum]
Chr02	4700689	intron_variant	Chr02.g06527	XP_003244885.1 unconventional myosin-XV isoform X3 [Acyrthosiphon pisum]
Chr02	4700698	intron_variant	Chr02.g06527	XP_003244885.1 unconventional myosin-XV isoform X3 [Acyrthosiphon pisum]
Chr02	4723993	missense_variant	Chr02.g06527	XP_003244885.1 unconventional myosin-XV isoform X3 [Acyrthosiphon pisum]
Chr02	4724789	synonymous_variant	Chr02.g06527	XP_003244885.1 unconventional myosin-XV isoform X3 [Acyrthosiphon pisum]
Chr02	4738268	synonymous_variant	Chr02.g06527	XP_003244885.1 unconventional myosin-XV isoform X3 [Acyrthosiphon pisum]
Chr02	4739512	synonymous_variant	Chr02.g06527	XP_003244885.1 unconventional myosin-XV isoform X3 [Acyrthosiphon pisum]
Chr02	4819518	intron_variant	Chr02.g06529	XP_008183609.1 acidic repeat-containing protein isoform X1 [Acyrthosiphon pisum]
Chr02	4819588	intron_variant	Chr02.g06529	XP_008183609.1 acidic repeat-containing protein isoform X1 [Acyrthosiphon pisum]
Chr02	4824717	intergenic_region	Chr02.g06529-Chr02.g06530	XP_008183609.1 acidic repeat-containing protein isoform X1 [Acyrthosiphon pisum]
Chr02	4842138	5_prime_UTR_variant	Chr02.g06532	XP_001944622.3 LOW QUALITY PROTEIN: protein CLEC16A homolog [Acyrthosiphon pisum]
Chr02	4845578	synonymous_variant	Chr02.g06532	XP_001944622.3 LOW QUALITY PROTEIN: protein CLEC16A homolog [Acyrthosiphon pisum]
Chr02	4881577	intergenic_region	Chr02.g06533-Chr02.g06534	XP_008188248.1 putative 3-methyladenine DNA glycosylase isoform X1 [Acyrthosiphon pisum]
Chr02	4901537	intron_variant	Chr02.g06534	XP_001950020.2 inactive rhomboid protein 1 isoform X1 [Acyrthosiphon pisum]
Chr02	4904178	intron_variant	Chr02.g06534	XP_001950020.2 inactive rhomboid protein 1 isoform X1 [Acyrthosiphon pisum]
Chr02	4904865	intron_variant	Chr02.g06534	XP_001950020.2 inactive rhomboid protein 1 isoform X1 [Acyrthosiphon pisum]
Chr02	4905548	intron_variant	Chr02.g06534	XP_001950020.2 inactive rhomboid protein 1 isoform X1 [Acyrthosiphon pisum]
Chr02	4925265	intron_variant	Chr02.g06534	XP_001950020.2 inactive rhomboid protein 1 isoform X1 [Acyrthosiphon pisum]
Chr02	4925303	intron_variant	Chr02.g06534	XP_001950020.2 inactive rhomboid protein 1 isoform X1 [Acyrthosiphon pisum]
Chr02	4925474	intron_variant	Chr02.g06534	XP_001950020.2 inactive rhomboid protein 1 isoform X1 [Acyrthosiphon pisum]
Chr02	5000731	synonymous_variant	Chr02.g06537	XP_008184243.1 mucin-3A isoform X1 [Acyrthosiphon pisum]
Chr02	5001839	synonymous_variant	Chr02.g06537	XP_008184243.1 mucin-3A isoform X1 [Acyrthosiphon pisum]
Chr02	5051234	intron_variant	Chr02.g06537	XP_008184243.1 mucin-3A isoform X1 [Acyrthosiphon pisum]
Chr02	5051757	intron_variant	Chr02.g06537	XP_008184243.1 mucin-3A isoform X1 [Acyrthosiphon pisum]
Chr02	5242503	missense_variant	Chr02.g06544	XP_001943486.1 signal peptide, CUB and EGF-like domain-containing protein 1 [Acyrthosiphon pisum]
Chr02	5257366	3_prime_UTR_variant	Chr02.g06546	XP_008187055.1 cycle isoform X1 [Acyrthosiphon pisum]
Chr02	5379554	intron_variant	Chr02.g06553	XP_001952397.1 membrane-bound transcription factor site-1 protease isoform X1 [Acyrthosiphon pisum]
Chr02	5380386	intron_variant	Chr02.g06553	XP_001952397.1 membrane-bound transcription factor site-1 protease isoform X1 [Acyrthosiphon pisum]
Chr02	5380402	intron_variant	Chr02.g06553	XP_001952397.1 membrane-bound transcription factor site-1 protease isoform X1 [Acyrthosiphon pisum]
Chr02	5380408	intron_variant	Chr02.g06553	XP_001952397.1 membrane-bound transcription factor site-1 protease isoform X1 [Acyrthosiphon pisum]
Chr02	5381310	intron_variant	Chr02.g06553	XP_001952397.1 membrane-bound transcription factor site-1 protease isoform X1 [Acyrthosiphon pisum]
Chr02	5381757	intron_variant	Chr02.g06553	XP_001952397.1 membrane-bound transcription factor site-1 protease isoform X1 [Acyrthosiphon pisum]
Chr02	5439983	synonymous_variant	Chr02.g06561	KAF0756762.1 serine hydrolase-like protein [Aphis craccivora]
Chr02	5442011	synonymous_variant	Chr02.g06561	KAF0756762.1 serine hydrolase-like protein [Aphis craccivora]
Chr02	5569676	intron_variant	Chr02.g06565	XP_029343945.1 uncharacterized protein LOC100572104 [Acyrthosiphon pisum]
Chr02	5696523	intergenic_region	Chr02.g06566-Chr02.g06567	QGW08833.1 uridine 5'-diphospho-glucuronosyltransferase [Sitobion avenae]
Chr02	5696530	intergenic_region	Chr02.g06566-Chr02.g06567	QGW08833.1 uridine 5'-diphospho-glucuronosyltransferase [Sitobion avenae]
Chr02	6051244	3_prime_UTR_variant	Chr02.g06590	XP_027847773.1 protein bric-a-brac 1-like [Aphis gossypii]
Chr02	6084926	intron_variant	Chr02.g06590	XP_027847773.1 protein bric-a-brac 1-like [Aphis gossypii]
Chr02	6275140	missense_variant	Chr02.g06595	XP_001943480.2 citron Rho-interacting kinase [Acyrthosiphon pisum]
Chr02	6278977	synonymous_variant	Chr02.g06595	XP_001943480.2 citron Rho-interacting kinase [Acyrthosiphon pisum]
Chr02	6313175	intron_variant	Chr02.g06598	XP_008187379.1 par domain protein 1 isoform X1 [Acyrthosiphon pisum]
Chr02	6418731	intron_variant	Chr02.g06599	XP_022173816.1 cationic amino acid transporter 4 [Myzus persicae]
Chr02	6554809	synonymous_variant	Chr02.g06603	XP_001944980.2 RING finger protein nhl-1 isoform X1 [Acyrthosiphon pisum]
Chr02	6554995	synonymous_variant	Chr02.g06603	XP_001944980.2 RING finger protein nhl-1 isoform X1 [Acyrthosiphon pisum]
Chr02	6559711	synonymous_variant	Chr02.g06603	XP_001944980.2 RING finger protein nhl-1 isoform X1 [Acyrthosiphon pisum]
Chr02	6559939	synonymous_variant	Chr02.g06603	XP_001944980.2 RING finger protein nhl-1 isoform X1 [Acyrthosiphon pisum]
Chr02	6572874	5_prime_UTR_variant	Chr02.g06603	XP_001944980.2 RING finger protein nhl-1 isoform X1 [Acyrthosiphon pisum]
Chr02	6604175	intergenic_region	Chr02.g06603-Chr02.g06604	XP_001944980.2 RING finger protein nhl-1 isoform X1 [Acyrthosiphon pisum]
Chr02	6737674	intergenic_region	Chr02.g06605-Chr02.g06606	XP_008180527.1 uncharacterized protein LOC103308615 [Acyrthosiphon pisum]
Chr02	6801799	intergenic_region	Chr02.g06605-Chr02.g06606	XP_008180527.1 uncharacterized protein LOC103308615 [Acyrthosiphon pisum]
Chr02	6827790	intergenic_region	Chr02.g06605-Chr02.g06606	XP_008180527.1 uncharacterized protein LOC103308615 [Acyrthosiphon pisum]
Chr02	6845274	intergenic_region	Chr02.g06605-Chr02.g06606	XP_008180527.1 uncharacterized protein LOC103308615 [Acyrthosiphon pisum]
Chr02	6977207	3_prime_UTR_variant	Chr02.g06610	XP_001947473.1 J domain-containing protein [Acyrthosiphon pisum]
Chr02	6999487	synonymous_variant	Chr02.g06611	XP_008181443.1 putative homeodomain transcription factor [Acyrthosiphon pisum]
Chr02	7018386	intron_variant	Chr02.g06612	XP_001944769.1 transcription elongation factor B polypeptide 3 [Acyrthosiphon pisum]
Chr02	7021943	intergenic_region	Chr02.g06612-Chr02.g06613	XP_001944769.1 transcription elongation factor B polypeptide 3 [Acyrthosiphon pisum]
Chr02	7023125	intergenic_region	Chr02.g06612-Chr02.g06613	XP_001944769.1 transcription elongation factor B polypeptide 3 [Acyrthosiphon pisum]
Chr02	7024045	intergenic_region	Chr02.g06612-Chr02.g06613	XP_001944769.1 transcription elongation factor B polypeptide 3 [Acyrthosiphon pisum]
Chr02	7029702	synonymous_variant	Chr02.g06613	XP_008181449.2 gamma-2-syntrophin [Acyrthosiphon pisum]
Chr02	7056637	synonymous_variant	Chr02.g06614	XP_001944649.2 hairy/enhancer-of-split related with YRPW motif protein [Acyrthosiphon pisum]
Chr02	7056646	synonymous_variant	Chr02.g06614	XP_001944649.2 hairy/enhancer-of-split related with YRPW motif protein [Acyrthosiphon pisum]
Chr02	7063957	intergenic_region	Chr02.g06614-Chr02.g06615	XP_001944649.2 hairy/enhancer-of-split related with YRPW motif protein [Acyrthosiphon pisum]
Chr02	7076219	intron_variant	Chr02.g06616	KAF0772224.1 Uncharacterized protein FWK35_00008572 [Aphis craccivora]
Chr02	7077124	intron_variant	Chr02.g06616	KAF0772224.1 Uncharacterized protein FWK35_00008572 [Aphis craccivora]
Chr02	7123761	intergenic_region	Chr02.g06616-Chr02.g06617	XP_001944597.2 semaphorin-1A [Acyrthosiphon pisum]
Chr02	7145866	missense_variant	Chr02.g06617	XP_001944540.1 integrator complex subunit 14 [Acyrthosiphon pisum]
Chr02	7252821	intergenic_region	Chr02.g06620-Chr02.g06621	XP_016658618.1 insulin gene enhancer protein isl-1 isoform X3 [Acyrthosiphon pisum]
Chr02	7254959	intron_variant	Chr02.g06621	XP_016658618.1 insulin gene enhancer protein isl-1 isoform X3 [Acyrthosiphon pisum]
Chr02	7256239	intron_variant	Chr02.g06621	XP_016658618.1 insulin gene enhancer protein isl-1 isoform X3 [Acyrthosiphon pisum]
Chr02	7258636	synonymous_variant	Chr02.g06621	XP_016658618.1 insulin gene enhancer protein isl-1 isoform X3 [Acyrthosiphon pisum]
Chr02	7391510	synonymous_variant	Chr02.g06623	XP_022176082.1 S phase cyclin A-associated protein in the endoplasmic reticulum [Myzus persicae]
Chr02	7391561	synonymous_variant	Chr02.g06623	XP_022176082.1 S phase cyclin A-associated protein in the endoplasmic reticulum [Myzus persicae]
Chr02	7401750	intron_variant	Chr02.g06624	XP_022176082.1 S phase cyclin A-associated protein in the endoplasmic reticulum [Myzus persicae]
Chr02	7511970	intergenic_region	Chr02.g06631-Chr02.g06632	XP_001948732.2 gastrula zinc finger protein XlCGF57.1 [Acyrthosiphon pisum]
Chr02	7533326	intergenic_region	Chr02.g06632-Chr02.g06633	KAF0771022.1 poly(rC)-binding protein 3 isoform X1, partial [Aphis craccivora]
Chr02	7534171	intergenic_region	Chr02.g06632-Chr02.g06633	KAF0771022.1 poly(rC)-binding protein 3 isoform X1, partial [Aphis craccivora]
Chr02	7560884	missense_variant	Chr02.g06634	XP_003244019.1 putative leucine-rich repeat-containing protein DDB_G0290503 [Acyrthosiphon pisum]
Chr02	7615957	intron_variant	Chr02.g06635	XP_029343960.1 V-type proton ATPase 116 kDa subunit a isoform X2 [Acyrthosiphon pisum]
Chr02	7659626	intergenic_region	Chr02.g06637-Chr02.g06638	XP_001944606.2 ATP-binding cassette sub-family B member 7, mitochondrial [Acyrthosiphon pisum]
Chr02	7664290	intron_variant	Chr02.g06638	XP_001944606.2 ATP-binding cassette sub-family B member 7, mitochondrial [Acyrthosiphon pisum]
Chr02	7694343	synonymous_variant	Chr02.g06639	XP_022176157.1 CREB-binding protein-like [Myzus persicae]
Chr02	7696281	synonymous_variant	Chr02.g06639	XP_022176157.1 CREB-binding protein-like [Myzus persicae]
Chr02	7697577	synonymous_variant	Chr02.g06639	XP_022176157.1 CREB-binding protein-like [Myzus persicae]
Chr02	7698009	synonymous_variant	Chr02.g06639	XP_022176157.1 CREB-binding protein-like [Myzus persicae]
Chr02	7892337	intron_variant	Chr02.g06648	XP_001947222.2 tubulin-specific chaperone cofactor E-like protein [Acyrthosiphon pisum]
Chr02	7892758	intron_variant	Chr02.g06648	XP_001947222.2 tubulin-specific chaperone cofactor E-like protein [Acyrthosiphon pisum]
Chr02	7893330	intron_variant	Chr02.g06648	XP_001947222.2 tubulin-specific chaperone cofactor E-like protein [Acyrthosiphon pisum]
Chr02	7894553	missense_variant	Chr02.g06648	XP_001947222.2 tubulin-specific chaperone cofactor E-like protein [Acyrthosiphon pisum]
Chr02	7896347	intron_variant	Chr02.g06648	XP_001947222.2 tubulin-specific chaperone cofactor E-like protein [Acyrthosiphon pisum]
Chr02	7912152	3_prime_UTR_variant	Chr02.g06651	XP_001946628.1 endoplasmic reticulum lectin 1 isoform X1 [Acyrthosiphon pisum]
Chr02	7924440	5_prime_UTR_premature_start_codon_gain_variant	Chr02.g06652	NP_001155656.1 eukaryotic translation initiation factor 3 subunit F [Acyrthosiphon pisum]
Chr02	7930420	intergenic_region	Chr02.g06652-Chr02.g06653	NP_001155656.1 eukaryotic translation initiation factor 3 subunit F [Acyrthosiphon pisum]
Chr02	7936490	5_prime_UTR_variant	Chr02.g06653	XP_001946679.1 AN1-type zinc finger protein 4 [Acyrthosiphon pisum]
Chr02	7940390	5_prime_UTR_variant	Chr02.g06654	XP_015378869.1 PREDICTED: structural maintenance of chromosomes protein 5 [Diuraphis noxia]
Chr02	7952923	intergenic_region	Chr02.g06654-Chr02.g06655	XP_015378869.1 PREDICTED: structural maintenance of chromosomes protein 5 [Diuraphis noxia]
Chr02	7953236	intergenic_region	Chr02.g06654-Chr02.g06655	XP_015378869.1 PREDICTED: structural maintenance of chromosomes protein 5 [Diuraphis noxia]
Chr02	7954843	intergenic_region	Chr02.g06654-Chr02.g06655	XP_015378869.1 PREDICTED: structural maintenance of chromosomes protein 5 [Diuraphis noxia]
Chr02	7954989	intergenic_region	Chr02.g06654-Chr02.g06655	XP_015378869.1 PREDICTED: structural maintenance of chromosomes protein 5 [Diuraphis noxia]
Chr02	7980876	intron_variant	Chr02.g06657	XP_015378888.1 PREDICTED: uncharacterized protein LOC107173049 isoform X1 [Diuraphis noxia]
Chr02	7986614	intron_variant	Chr02.g06657	XP_015378888.1 PREDICTED: uncharacterized protein LOC107173049 isoform X1 [Diuraphis noxia]
Chr02	8012974	synonymous_variant	Chr02.g06657	XP_015378888.1 PREDICTED: uncharacterized protein LOC107173049 isoform X1 [Diuraphis noxia]
Chr02	8013530	synonymous_variant	Chr02.g06657	XP_015378888.1 PREDICTED: uncharacterized protein LOC107173049 isoform X1 [Diuraphis noxia]
Chr02	8022877	intron_variant	Chr02.g06657	XP_015378888.1 PREDICTED: uncharacterized protein LOC107173049 isoform X1 [Diuraphis noxia]
Chr02	8034671	intron_variant	Chr02.g06657	XP_015378888.1 PREDICTED: uncharacterized protein LOC107173049 isoform X1 [Diuraphis noxia]
Chr02	8036637	intron_variant	Chr02.g06657	XP_015378888.1 PREDICTED: uncharacterized protein LOC107173049 isoform X1 [Diuraphis noxia]
Chr02	8036642	intron_variant	Chr02.g06657	XP_015378888.1 PREDICTED: uncharacterized protein LOC107173049 isoform X1 [Diuraphis noxia]
Chr02	8037968	intron_variant	Chr02.g06657	XP_015378888.1 PREDICTED: uncharacterized protein LOC107173049 isoform X1 [Diuraphis noxia]
Chr02	8039861	intron_variant	Chr02.g06657
Chr02	8126009	synonymous_variant	Chr02.g06660	XP_008179772.1 LOW QUALITY PROTEIN: aminopeptidase N [Acyrthosiphon pisum]
Chr02	8183352	missense_variant	Chr02.g06664	XP_029342186.1 mucin-2 [Acyrthosiphon pisum]
Chr02	8185989	synonymous_variant	Chr02.g06664	XP_029342186.1 mucin-2 [Acyrthosiphon pisum]
Chr02	8191277	intron_variant	Chr02.g06665	XP_029342186.1 mucin-2 [Acyrthosiphon pisum]
Chr02	8270113	intron_variant	Chr02.g06667	DAA06100.1 TPA_inf: cathepsin B [Acyrthosiphon pisum]
Chr02	8271215	missense_variant	Chr02.g06667	DAA06100.1 TPA_inf: cathepsin B [Acyrthosiphon pisum]
Chr02	8428181	intron_variant	Chr02.g06669	XP_001946434.1 ly6/PLAUR domain-containing protein 6B [Acyrthosiphon pisum]
Chr02	8428192	intron_variant	Chr02.g06669	XP_001946434.1 ly6/PLAUR domain-containing protein 6B [Acyrthosiphon pisum]
Chr02	8429199	intron_variant	Chr02.g06669	XP_001946434.1 ly6/PLAUR domain-containing protein 6B [Acyrthosiphon pisum]
Chr02	8467019	3_prime_UTR_variant	Chr02.g06669	XP_001946434.1 ly6/PLAUR domain-containing protein 6B [Acyrthosiphon pisum]
Chr02	8484000	synonymous_variant	Chr02.g06671	XP_016659994.1 transmembrane protein KIAA1109 isoform X3 [Acyrthosiphon pisum]
Chr02	8535872	synonymous_variant	Chr02.g06673	XP_015369494.1 PREDICTED: netrin-A-like [Diuraphis noxia]
Chr02	8614876	intergenic_region	Chr02.g06673-Chr02.g06674	XP_015369494.1 PREDICTED: netrin-A-like [Diuraphis noxia]
Chr02	8641003	intron_variant	Chr02.g06676	XP_022165239.1 syntaxin-8 [Myzus persicae]
Chr02	8641095	intron_variant	Chr02.g06676	XP_022165239.1 syntaxin-8 [Myzus persicae]
Chr02	8674980	intron_variant	Chr02.g06677	XP_001946981.2 BTB/POZ domain-containing protein 2 isoform X1 [Acyrthosiphon pisum]
Chr02	8675964	intron_variant	Chr02.g06677	XP_001946981.2 BTB/POZ domain-containing protein 2 isoform X1 [Acyrthosiphon pisum]
Chr02	8714374	intron_variant	Chr02.g06678	XP_008184058.1 transcriptional repressor protein YY1 isoform X1 [Acyrthosiphon pisum]
Chr02	8714483	intron_variant	Chr02.g06678	XP_008184058.1 transcriptional repressor protein YY1 isoform X1 [Acyrthosiphon pisum]
Chr02	8720149	intergenic_region	Chr02.g06678-Chr02.g06679	XP_008184058.1 transcriptional repressor protein YY1 isoform X1 [Acyrthosiphon pisum]
Chr02	8815352	synonymous_variant	Chr02.g06682	XP_001948344.2 chromosome-associated kinesin KIF4 [Acyrthosiphon pisum]
Chr02	8819620	intron_variant	Chr02.g06683	XP_001948344.2 chromosome-associated kinesin KIF4 [Acyrthosiphon pisum]
Chr02	8837986	intron_variant	Chr02.g06684	XP_001948390.2 uncharacterized protein LOC100163498 isoform X1 [Acyrthosiphon pisum]
Chr02	8886048	intron_variant	Chr02.g06687	KAE9538211.1 hypothetical protein AGLY_006183 [Aphis glycines]
Chr02	8891583	intron_variant	Chr02.g06687	NP_001280324.1 transmembrane emp24 domain-containing protein eca precursor [Acyrthosiphon pisum]
Chr02	8892173	intron_variant	Chr02.g06687	XP_022165231.1 DDRGK domain-containing protein 1 isoform X1 [Myzus persicae]
Chr02	8893369	intron_variant	Chr02.g06687	XP_022165231.1 DDRGK domain-containing protein 1 isoform X1 [Myzus persicae]
Chr02	8893640	synonymous_variant	Chr02.g06687	KAE9538211.1 hypothetical protein AGLY_006183 [Aphis glycines]
Chr02	8925366	3_prime_UTR_variant	Chr02.g06693	XP_022163215.1 LOW QUALITY PROTEIN: protein CREBRF homolog [Myzus persicae]
Chr02	8927756	intergenic_region	Chr02.g06693-Chr02.g06694	XP_022163215.1 LOW QUALITY PROTEIN: protein CREBRF homolog [Myzus persicae]
Chr02	8936839	intergenic_region	Chr02.g06693-Chr02.g06694	NP_001155906.1 uncharacterized protein LOC100302321 [Acyrthosiphon pisum]
Chr02	8941639	intron_variant	Chr02.g06694	NP_001155906.1 uncharacterized protein LOC100302321 [Acyrthosiphon pisum]
Chr02	8950518	synonymous_variant	Chr02.g06694	NP_001155906.1 uncharacterized protein LOC100302321 [Acyrthosiphon pisum]
Chr02	8960439	synonymous_variant	Chr02.g06696	XP_001948018.4 helicase SKI2W [Acyrthosiphon pisum]
Chr02	8962072	intron_variant	Chr02.g06696	XP_008178358.1 uncharacterized protein LOC100166862 [Acyrthosiphon pisum]
Chr02	8964383	synonymous_variant	Chr02.g06697	XP_008178358.1 uncharacterized protein LOC100166862 [Acyrthosiphon pisum]
Chr02	9112069	intergenic_region	Chr02.g06698-Chr02.g06699	XP_025207345.1 uncharacterized protein LOC112603130 [Melanaphis sacchari]
Chr02	9112739	intergenic_region	Chr02.g06698-Chr02.g06699	XP_025207345.1 uncharacterized protein LOC112603130 [Melanaphis sacchari]
Chr02	9123190	synonymous_variant	Chr02.g06699	XP_008178377.1 dopamine receptor 2 [Acyrthosiphon pisum]
Chr02	9232858	3_prime_UTR_variant	Chr02.g06703	XP_025203598.1 vesicle transport through interaction with t-SNAREs homolog 1A [Melanaphis sacchari]
Chr02	9313979	intergenic_region	Chr02.g06707-Chr02.g06708	XP_026815781.1 uncharacterized protein LOC113555556 isoform X1 [Rhopalosiphum maidis]
Chr02	9345796	synonymous_variant	Chr02.g06708	XP_001943898.1 uncharacterized protein LOC100169243 [Acyrthosiphon pisum]
Chr02	9345865	synonymous_variant	Chr02.g06708	XP_001943898.1 uncharacterized protein LOC100169243 [Acyrthosiphon pisum]
Chr02	9399176	intergenic_region	Chr02.g06708-Chr02.g06709	XP_001943850.2 probable serine/threonine-protein kinase nek3 isoform X2 [Acyrthosiphon pisum]
Chr02	9400217	5_prime_UTR_variant	Chr02.g06709	XP_001943850.2 probable serine/threonine-protein kinase nek3 isoform X2 [Acyrthosiphon pisum]
Chr02	9406158	intron_variant	Chr02.g06709	XP_001943850.2 probable serine/threonine-protein kinase nek3 isoform X2 [Acyrthosiphon pisum]
Chr02	9410453	intron_variant	Chr02.g06709	XP_001943850.2 probable serine/threonine-protein kinase nek3 isoform X2 [Acyrthosiphon pisum]
Chr02	9415570	intron_variant	Chr02.g06709	XP_001943850.2 probable serine/threonine-protein kinase nek3 isoform X2 [Acyrthosiphon pisum]
Chr02	9440224	intron_variant	Chr02.g06709	XP_001943850.2 probable serine/threonine-protein kinase nek3 isoform X2 [Acyrthosiphon pisum]
Chr02	9461531	intron_variant	Chr02.g06709	XP_001943850.2 probable serine/threonine-protein kinase nek3 isoform X2 [Acyrthosiphon pisum]
Chr02	9461734	intron_variant	Chr02.g06709	XP_001943850.2 probable serine/threonine-protein kinase nek3 isoform X2 [Acyrthosiphon pisum]
Chr02	9461759	intron_variant	Chr02.g06709	XP_001943850.2 probable serine/threonine-protein kinase nek3 isoform X2 [Acyrthosiphon pisum]
Chr02	9462937	intron_variant	Chr02.g06709	XP_001943850.2 probable serine/threonine-protein kinase nek3 isoform X2 [Acyrthosiphon pisum]
Chr02	9473501	intron_variant	Chr02.g06709	XP_001943850.2 probable serine/threonine-protein kinase nek3 isoform X2 [Acyrthosiphon pisum]
Chr02	9475224	intron_variant	Chr02.g06709	XP_001943850.2 probable serine/threonine-protein kinase nek3 isoform X2 [Acyrthosiphon pisum]
Chr02	9481420	intron_variant	Chr02.g06709	XP_001943850.2 probable serine/threonine-protein kinase nek3 isoform X2 [Acyrthosiphon pisum]
Chr02	9503311	intron_variant	Chr02.g06709	XP_001943850.2 probable serine/threonine-protein kinase nek3 isoform X2 [Acyrthosiphon pisum]
Chr02	9540882	intron_variant	Chr02.g06712	NP_001155792.1 CDGSH iron-sulfur domain-containing protein 3, mitochondrial-like [Acyrthosiphon pisum]
Chr02	9561274	intergenic_region	Chr02.g06716-Chr02.g06717	XP_022173838.1 chloride intracellular channel exc-4 isoform X1 [Myzus persicae]
Chr02	9570699	intron_variant	Chr02.g06717	XP_022173838.1 chloride intracellular channel exc-4 isoform X1 [Myzus persicae]
Chr02	9588363	intron_variant	Chr02.g06717	XP_001943697.1 wiskott-Aldrich syndrome protein family member 3 [Acyrthosiphon pisum]
Chr02	9588981	intron_variant	Chr02.g06717	XP_001943697.1 wiskott-Aldrich syndrome protein family member 3 [Acyrthosiphon pisum]
Chr02	9589802	intron_variant	Chr02.g06717	XP_001943697.1 wiskott-Aldrich syndrome protein family member 3 [Acyrthosiphon pisum]
Chr02	9589843	intron_variant	Chr02.g06717	XP_001943697.1 wiskott-Aldrich syndrome protein family member 3 [Acyrthosiphon pisum]
Chr02	9589976	intron_variant	Chr02.g06717	XP_001943697.1 wiskott-Aldrich syndrome protein family member 3 [Acyrthosiphon pisum]
Chr02	9614811	intergenic_region	Chr02.g06719-Chr02.g06720	NP_001233054.1 uncharacterized protein LOC100167860 [Acyrthosiphon pisum]
Chr02	9654522	intron_variant	Chr02.g06721	XP_003247299.1 dual 3',5'-cyclic-AMP and -GMP phosphodiesterase 11 isoform X2 [Acyrthosiphon pisum]
Chr02	9657423	intron_variant	Chr02.g06721	XP_003247299.1 dual 3',5'-cyclic-AMP and -GMP phosphodiesterase 11 isoform X2 [Acyrthosiphon pisum]
Chr02	9698069	intron_variant	Chr02.g06721	XP_003247299.1 dual 3',5'-cyclic-AMP and -GMP phosphodiesterase 11 isoform X2 [Acyrthosiphon pisum]
Chr02	9825737	synonymous_variant	Chr02.g06726	XP_001946109.2 nuclear pore complex protein Nup85 [Acyrthosiphon pisum]
Chr02	9836953	synonymous_variant	Chr02.g06727	XP_008183477.1 uncharacterized protein LOC100160892 [Acyrthosiphon pisum]
Chr02	9845411	intergenic_region	Chr02.g06727-Chr02.g06728	XP_008183477.1 uncharacterized protein LOC100160892 [Acyrthosiphon pisum]
Chr02	9857321	synonymous_variant	Chr02.g06729	XP_022173833.1 uncharacterized protein LOC111036202 isoform X1 [Myzus persicae]
Chr02	9858320	intron_variant	Chr02.g06729	XP_022173833.1 uncharacterized protein LOC111036202 isoform X1 [Myzus persicae]
Chr02	9865240	intron_variant	Chr02.g06729	XP_022173833.1 uncharacterized protein LOC111036202 isoform X1 [Myzus persicae]
Chr02	9870360	intron_variant	Chr02.g06729	XP_022173833.1 uncharacterized protein LOC111036202 isoform X1 [Myzus persicae]
Chr02	9870420	intron_variant	Chr02.g06729	XP_022173833.1 uncharacterized protein LOC111036202 isoform X1 [Myzus persicae]
Chr02	9877412	intron_variant	Chr02.g06729	XP_022173833.1 uncharacterized protein LOC111036202 isoform X1 [Myzus persicae]
Chr02	9940376	intergenic_region	Chr02.g06729-Chr02.g06730	XP_008183341.1 uncharacterized protein LOC100168613 isoform X1 [Acyrthosiphon pisum]
Chr02	9943106	intergenic_region	Chr02.g06730-Chr02.g06731	XP_008183341.1 uncharacterized protein LOC100168613 isoform X1 [Acyrthosiphon pisum]
Chr02	9943413	3_prime_UTR_variant	Chr02.g06731	XP_001952347.2 uncharacterized protein LOC100162365 [Acyrthosiphon pisum]
Chr02	10207748	intron_variant	Chr02.g06736	XP_001948700.2 protein artichoke [Acyrthosiphon pisum]
Chr02	10239476	intron_variant	Chr02.g06736	XP_001948700.2 protein artichoke [Acyrthosiphon pisum]
Chr02	10266307	intron_variant	Chr02.g06736	XP_001948700.2 protein artichoke [Acyrthosiphon pisum]
Chr02	10283004	intron_variant	Chr02.g06736	XP_001948700.2 protein artichoke [Acyrthosiphon pisum]
Chr02	10283018	intron_variant	Chr02.g06736	XP_001948700.2 protein artichoke [Acyrthosiphon pisum]
Chr02	10291336	intron_variant	Chr02.g06736	XP_001948700.2 protein artichoke [Acyrthosiphon pisum]
Chr02	10335051	intron_variant	Chr02.g06736	XP_001948700.2 protein artichoke [Acyrthosiphon pisum]
Chr02	10337033	intron_variant	Chr02.g06736	XP_001948700.2 protein artichoke [Acyrthosiphon pisum]
Chr02	10337245	intron_variant	Chr02.g06736	XP_001948700.2 protein artichoke [Acyrthosiphon pisum]
Chr02	10349114	intron_variant	Chr02.g06736	XP_001948700.2 protein artichoke [Acyrthosiphon pisum]
Chr02	10352521	intron_variant	Chr02.g06736	XP_001948700.2 protein artichoke [Acyrthosiphon pisum]
Chr02	10375629	intron_variant	Chr02.g06736	XP_001948700.2 protein artichoke [Acyrthosiphon pisum]
Chr02	10375691	intron_variant	Chr02.g06736	XP_001948700.2 protein artichoke [Acyrthosiphon pisum]
Chr02	10430150	intron_variant	Chr02.g06737	XP_026809664.1 serine/arginine-rich splicing factor 7-like [Rhopalosiphum maidis]
Chr02	10442812	missense_variant	Chr02.g06738	XP_003248179.3 uncharacterized protein PF11_0213-like [Acyrthosiphon pisum]
Chr02	10455429	missense_variant	Chr02.g06738	XP_003248179.3 uncharacterized protein PF11_0213-like [Acyrthosiphon pisum]
Chr02	10466401	intron_variant	Chr02.g06739	XP_022170275.1 protein borderless isoform X1 [Myzus persicae]
Chr02	10508259	intergenic_region	Chr02.g06740-Chr02.g06741	XP_022170282.1 spermatogenesis-associated protein 6 isoform X2 [Myzus persicae]
Chr02	10508475	intergenic_region	Chr02.g06740-Chr02.g06741	XP_022170282.1 spermatogenesis-associated protein 6 isoform X2 [Myzus persicae]
Chr02	10537526	intron_variant	Chr02.g06741	XP_008179049.1 uncharacterized protein LOC100166088 [Acyrthosiphon pisum]
Chr02	10537601	intron_variant	Chr02.g06741	XP_008179049.1 uncharacterized protein LOC100166088 [Acyrthosiphon pisum]
Chr02	10538583	intron_variant	Chr02.g06741	XP_008179049.1 uncharacterized protein LOC100166088 [Acyrthosiphon pisum]
Chr02	10562664	intron_variant	Chr02.g06741	XP_008179049.1 uncharacterized protein LOC100166088 [Acyrthosiphon pisum]
Chr02	10584780	missense_variant	Chr02.g06741	XP_008179049.1 uncharacterized protein LOC100166088 [Acyrthosiphon pisum]
Chr02	10647405	intron_variant	Chr02.g06743	NP_001156261.1 DNA-directed RNA polymerase II subunit RPB11-a [Acyrthosiphon pisum]
Chr02	10649012	intergenic_region	Chr02.g06743-Chr02.g06744	NP_001156261.1 DNA-directed RNA polymerase II subunit RPB11-a [Acyrthosiphon pisum]
[truncated: 9,679 more rows]
