# Supplementary material for: A-to-I RNA editing of CYP18A1 mediates transgenerational wing dimorphism in aphids
Source: eLife. 2025 Apr 3;13:RP96540. doi: 10.7554/eLife.96540 (PMC11968105; doi:10.7554/eLife.96540)
Supplement: Supplementary file 6. [file elife-96540-supp6.xlsx]

## Sheet: Sheet1
Chromosome	Editing Position	Editing Type	Related Gene ID	Related Gene Annotation	Coded Number in Fig. S2
Chr09	4355160	missense_variant	Chr09.g16657	XP_001947874.1 cytochrome P450 306a1 [Acyrthosiphon pisum]	1
Chr09	4354691	3 prime UTR variant	Chr09.g16657	XP_001947874.1 cytochrome P450 306a1 [Acyrthosiphon pisum]	2
Chr09	4363494	intergenic_region	Chr09.g16657-Chr09.g16658	XP_001947874.1 cytochrome P450 306a1 [Acyrthosiphon pisum]	Not detected in wingless adults
Chr04	27758379	missense_variant	Chr04.g10543	XP_029342548.1 cytochrome P450 302a1, mitochondrial isoform X1 [Acyrthosiphon pisum]	3
Chr07	10327827	missense_variant	Chr07.g14234	XP_001944183.2 cytochrome P450 315a1, mitochondrial [Acyrthosiphon pisum]	4
Chr07	10321240	intron_variant	Chr07.g14233	XP_001944183.2 cytochrome P450 315a1, mitochondrial [Acyrthosiphon pisum]	Not detected in wingless adults
Chr07	10331837	intergenic_region	Chr07.g14234-Chr07.g14235	XP_001944183.2 cytochrome P450 315a1, mitochondrial [Acyrthosiphon pisum]	5
Chr04	29135882	intron_variant	Chr04.g10601	XP_008182215.1 ecdysone receptor isoform X1 [Acyrthosiphon pisum]	Not detected in wingless adults
Chr02	14594426	5 prime UTR premature_start_codon_gain_variant	Chr02.g06891	XP_029344120.1 nuclear hormone receptor FTZ-F1 [Acyrthosiphon pisum]	6
Chr02	14625360	intergenic_region	Chr02.g06891-Chr02.g06892	XP_029344120.1 nuclear hormone receptor FTZ-F1 [Acyrthosiphon pisum]	Not detected in wingless adults
Chr02	14629226	intergenic_region	Chr02.g06891-Chr02.g06892	XP_029344120.1 nuclear hormone receptor FTZ-F1 [Acyrthosiphon pisum]	7
Chr02	14629348	intergenic_region	Chr02.g06891-Chr02.g06892	XP_029344120.1 nuclear hormone receptor FTZ-F1 [Acyrthosiphon pisum]	Not detected in wingless adults
Chr02	14629892	intergenic_region	Chr02.g06891-Chr02.g06892	XP_029344120.1 nuclear hormone receptor FTZ-F1 [Acyrthosiphon pisum]	Not detected in wingless adults
Chr09	27449096	intron_variant	Chr09.g17466	XP_001947027.2 nuclear hormone receptor FTZ-F1 beta isoform X1 [Acyrthosiphon pisum]	8
Chr03	29297370	intergenic_region	Chr03.g09092-Chr03.g09093	XP_025199548.1 ecdysone-induced protein 74EF [Melanaphis sacchari]	Not detected in wingless adults
Chr03	29285489	synonymous_variant	Chr03.g09092	XP_025199548.1 ecdysone-induced protein 74EF [Melanaphis sacchari]	9
Chr03	29283182	intron_variant	Chr03.g09092	XP_025199548.1 ecdysone-induced protein 74EF [Melanaphis sacchari]	Not detected in wingless adults
Chr08	17478604	intergenic_region	Chr08.g15840-Chr08.g15841	XP_022162355.1 ecdysone-inducible protein E75-like isoform X1 [Myzus persicae]	Not detected in wingless adults
Chr08	17479150	intergenic_region	Chr08.g15840-Chr08.g15841	XP_022162355.1 ecdysone-inducible protein E75-like isoform X1 [Myzus persicae]	Not detected in wingless adults
Chr08	17478491	intergenic_region	Chr08.g15840-Chr08.g15841	XP_022162355.1 ecdysone-inducible protein E75-like isoform X1 [Myzus persicae]	Not detected in wingless adults
Chr02	11532167	intergenic_region	Chr02.g06764-Chr02.g06765	XP_008180578.1 broad-complex core protein isoform X1 [Acyrthosiphon pisum]	Not detected in wingless adults
Chr07	11757445	intron_variant	Chr07.g14328	XP_008178792.1 broad-complex core protein isoforms 1/2/3/4/5 isoform X2 [Acyrthosiphon pisum]	Not detected in wingless adults
Chr02	11538331	intergenic_region	Chr02.g06764-Chr02.g06765	XP_008180578.1 broad-complex core protein isoform X1 [Acyrthosiphon pisum]	Not detected in wingless adults
Chr02	11519947	intron_variant	Chr02.g06764	XP_008180578.1 broad-complex core protein isoform X1 [Acyrthosiphon pisum]	Not detected in wingless adults
Chr07	11780404	intron_variant	Chr07.g14328	XP_008178792.1 broad-complex core protein isoforms 1/2/3/4/5 isoform X2 [Acyrthosiphon pisum]	Not detected in wingless adults
Chr07	11771925	intron_variant	Chr07.g14328	XP_008178792.1 broad-complex core protein isoforms 1/2/3/4/5 isoform X2 [Acyrthosiphon pisum]	Not detected in wingless adults
													3
													6
