# Supplementary material for: A-to-I RNA editing of CYP18A1 mediates transgenerational wing dimorphism in aphids
Source: eLife. 2025 Apr 3;13:RP96540. doi: 10.7554/eLife.96540 (PMC11968105; doi:10.7554/eLife.96540)
Supplement: Supplementary file 7. [file elife-96540-supp7.xlsx]

## Sheet: Sheet1
Primers used in this study.
CYP18A1-528F	GCACTTGGTACTCCGACACA
CYP18A1-528R	CGGTTCGAATCTGACACTCA
CYP18A1-759F	GAGCTTGTTTTTGCCGAGAC
CYP18A1-759R	CAAGCCCTGAAACAGTTGGT
CYP18A1-qF	GGAGATCAAACGCTCTCAGG
CYP18A1-qR	TACCGAATCGATCTCGTCCT
ADAR2-qF	TTACATGATTGCCATGCAGA
ADAR2-qR	CCACAAGGAGCCGTGTTTAT
Actin-qF	CTGCCGCTTCCACCTCATT
Actin-qR	GATACCGCAAGATTCCATTCC
GAPDH-qF	GCTCCATTAGCCAAGGTTATTC
GAPDH-qR	CAGCACCTCTACCATCTCTCC
mir-3036-5p-qF	ATTGGTTTCTAGATCTCAGCA
U6-qF	CGCAAGGATGACACGCAA
miRNA Universal primer R	TAACGAGACGACGACAGAC
dsADAR2-F	TGCAGAAATATTGACCCGCAG
dsADAR2-R	TTCACCCTGAGCAACACCAT
dsCYP18A1-F	AACGACGGGTACATGGACAT
dsCYP18A1-R	CTCAACATGCCGAACAGCTT
